# Supplementary material
Source: PubMed Central journal article supplement (PMC6537907)

Mass spectrum

Deconvoluted spectrum

Annotated masses

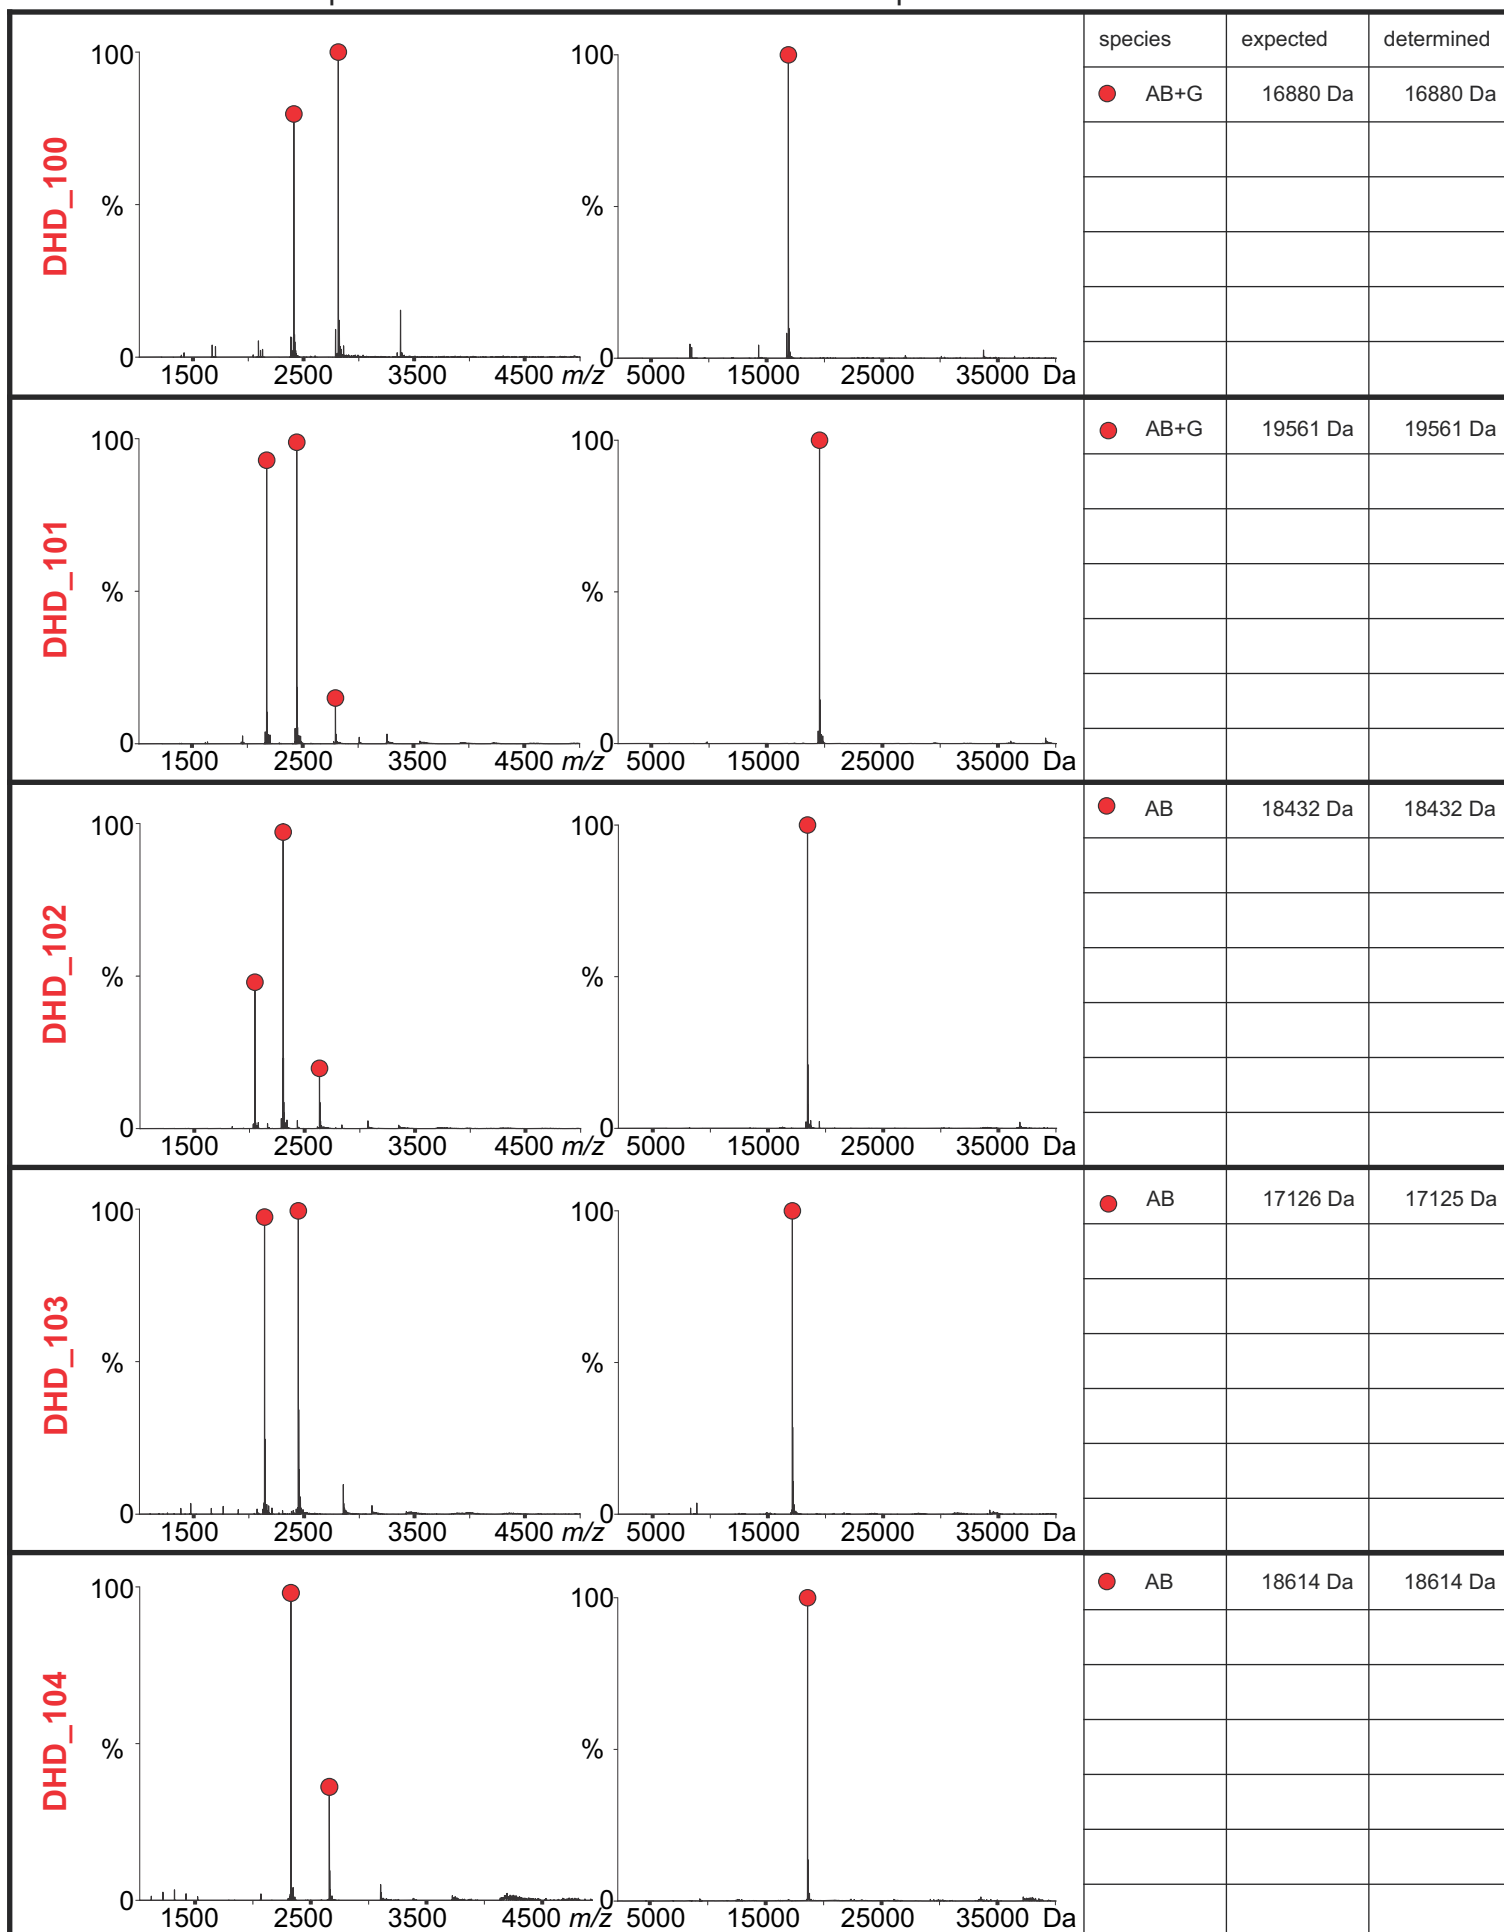

Mass spectrum

Deconvoluted spectrum

Annotated masses

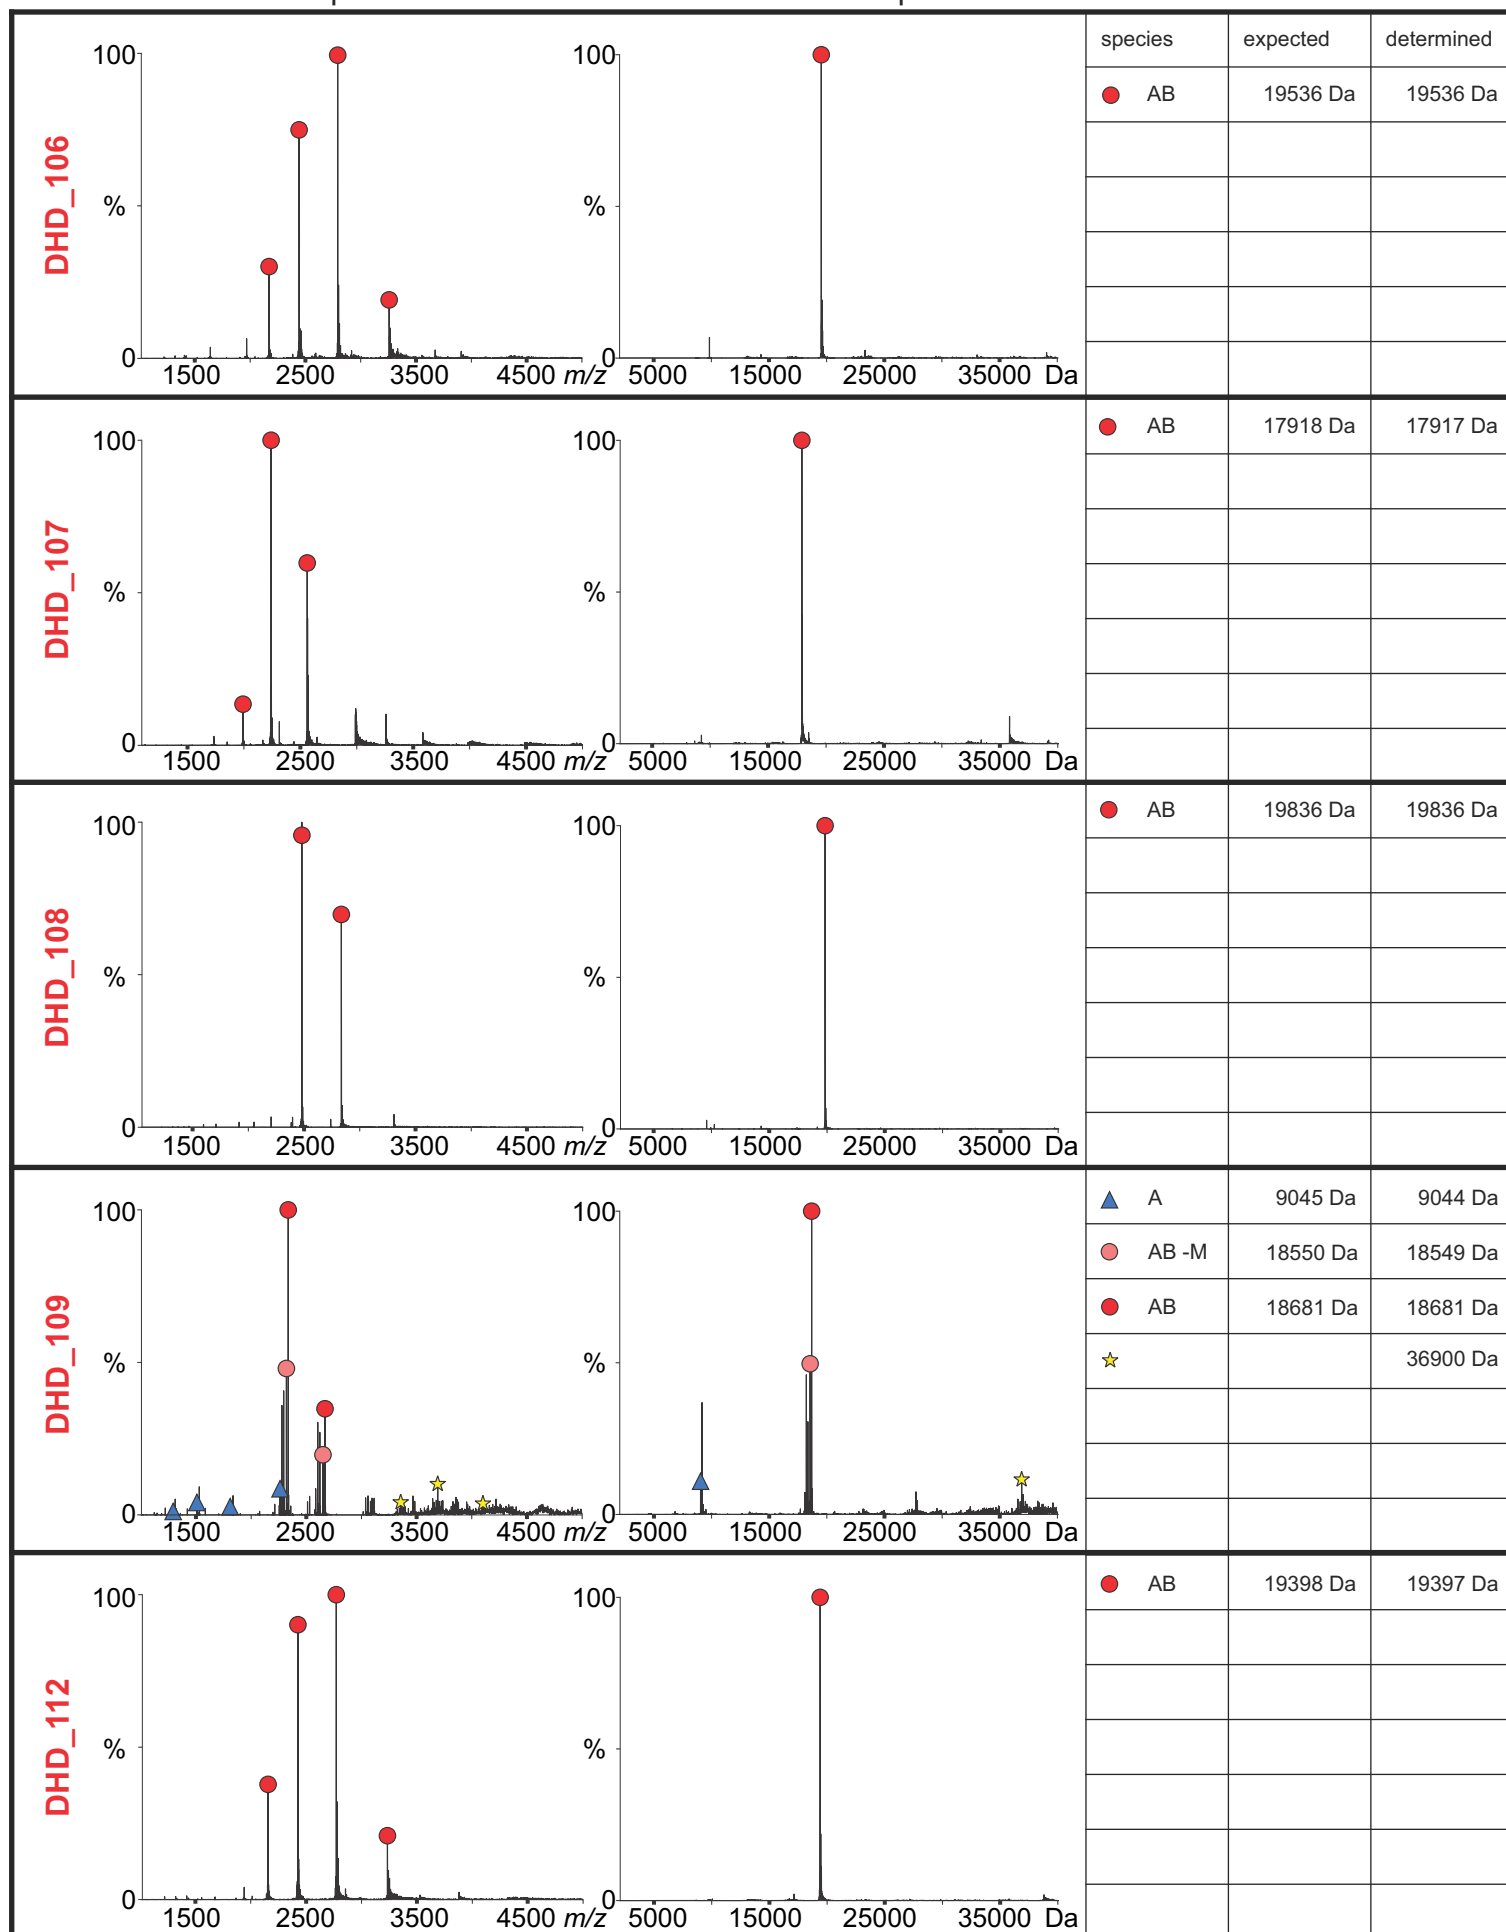

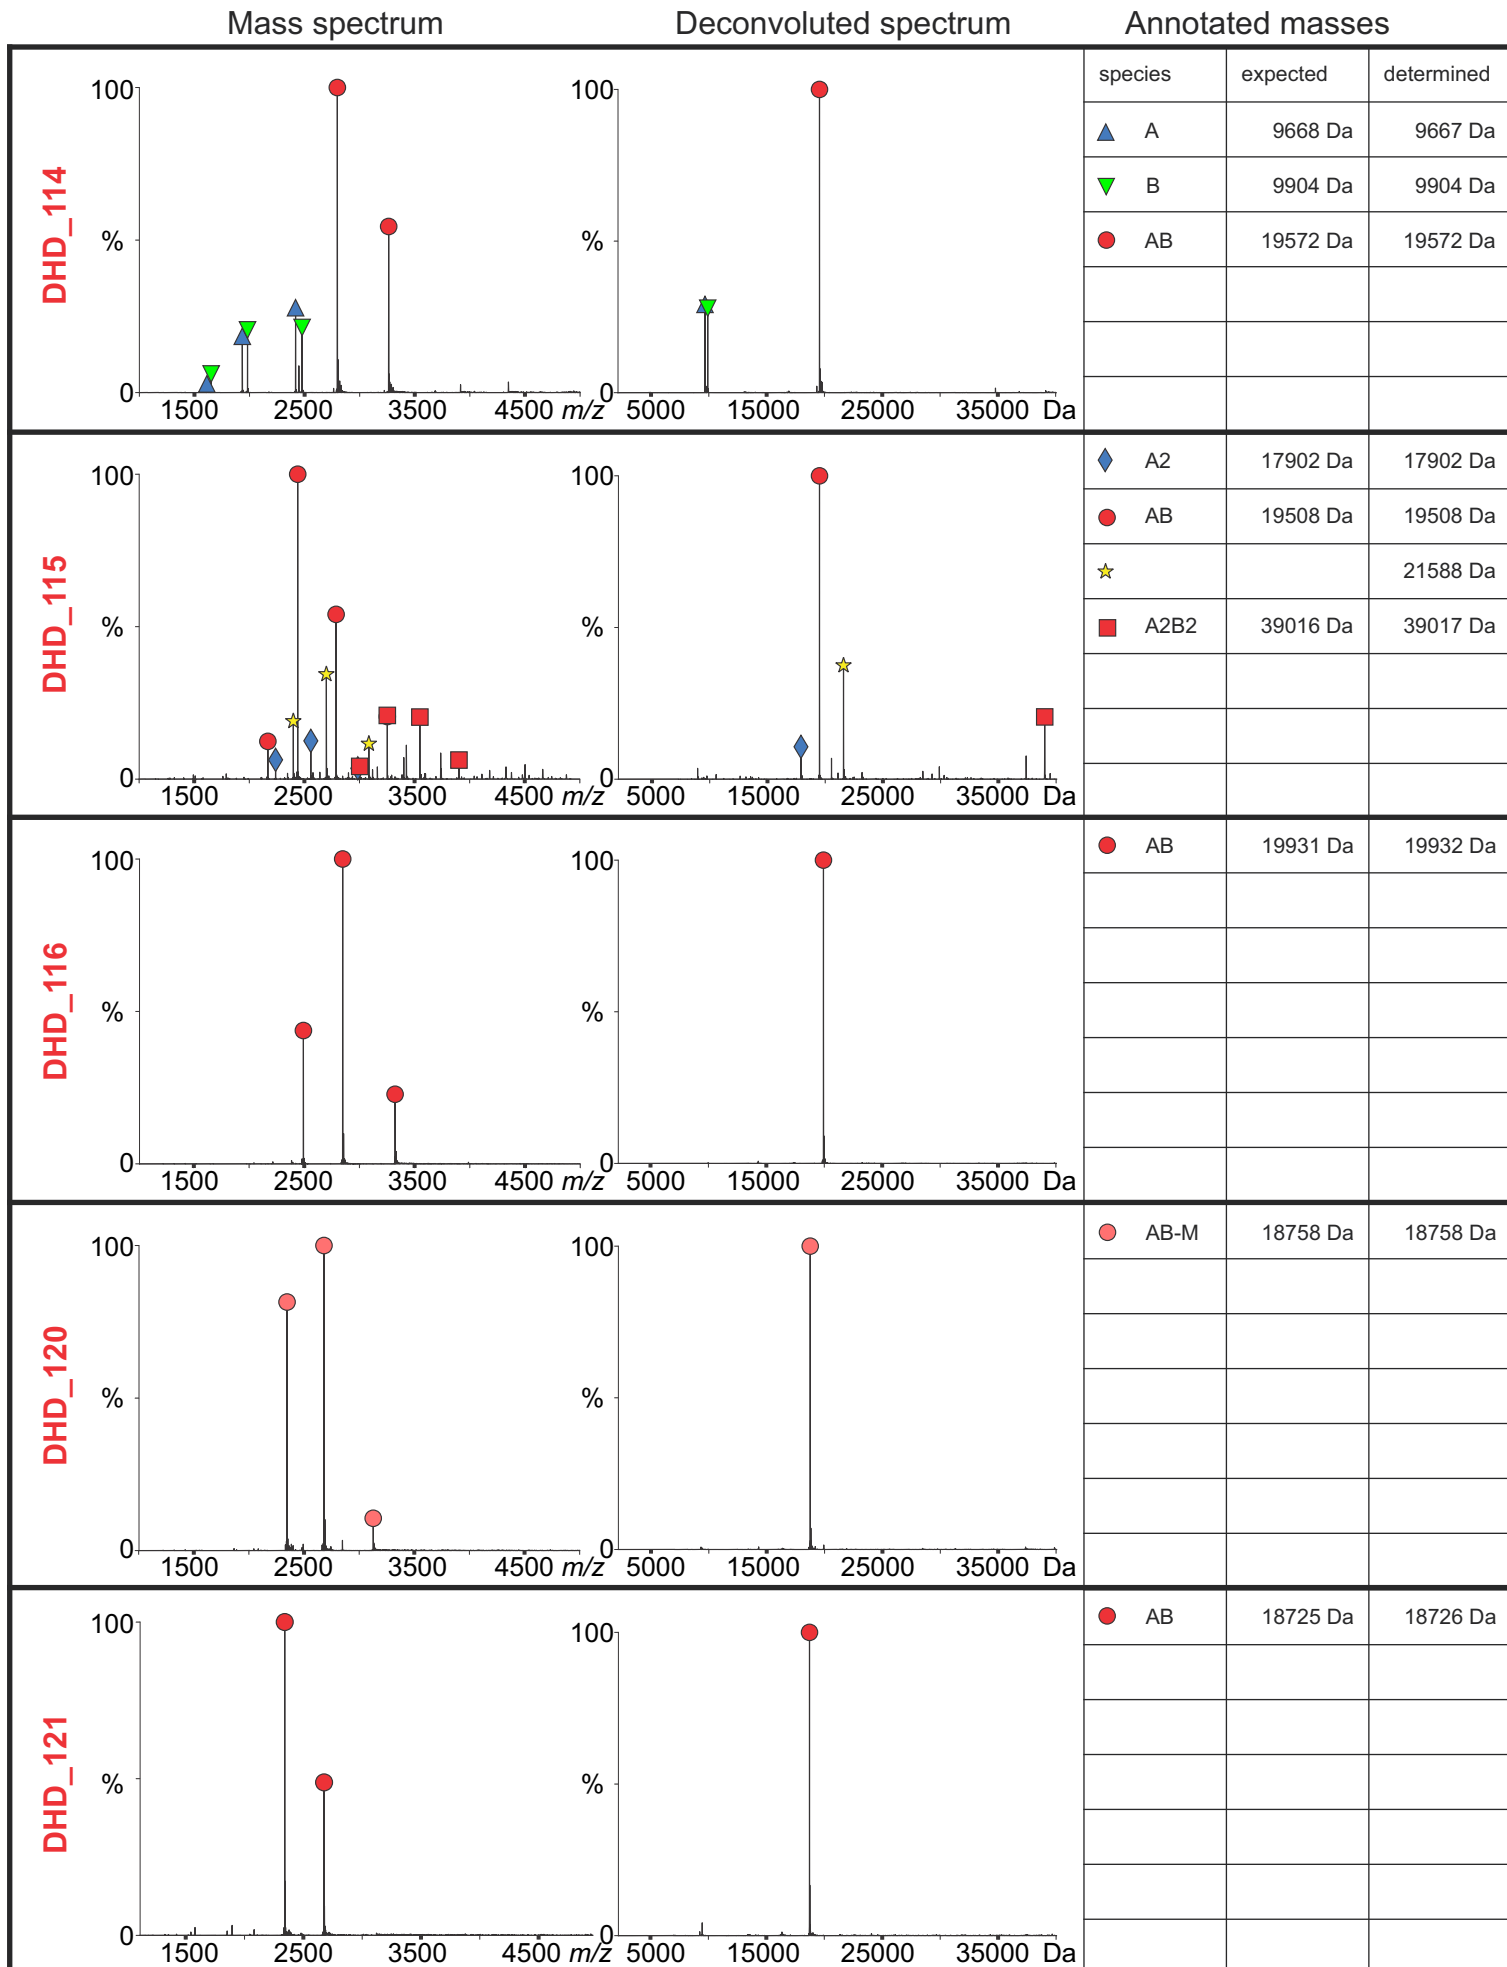

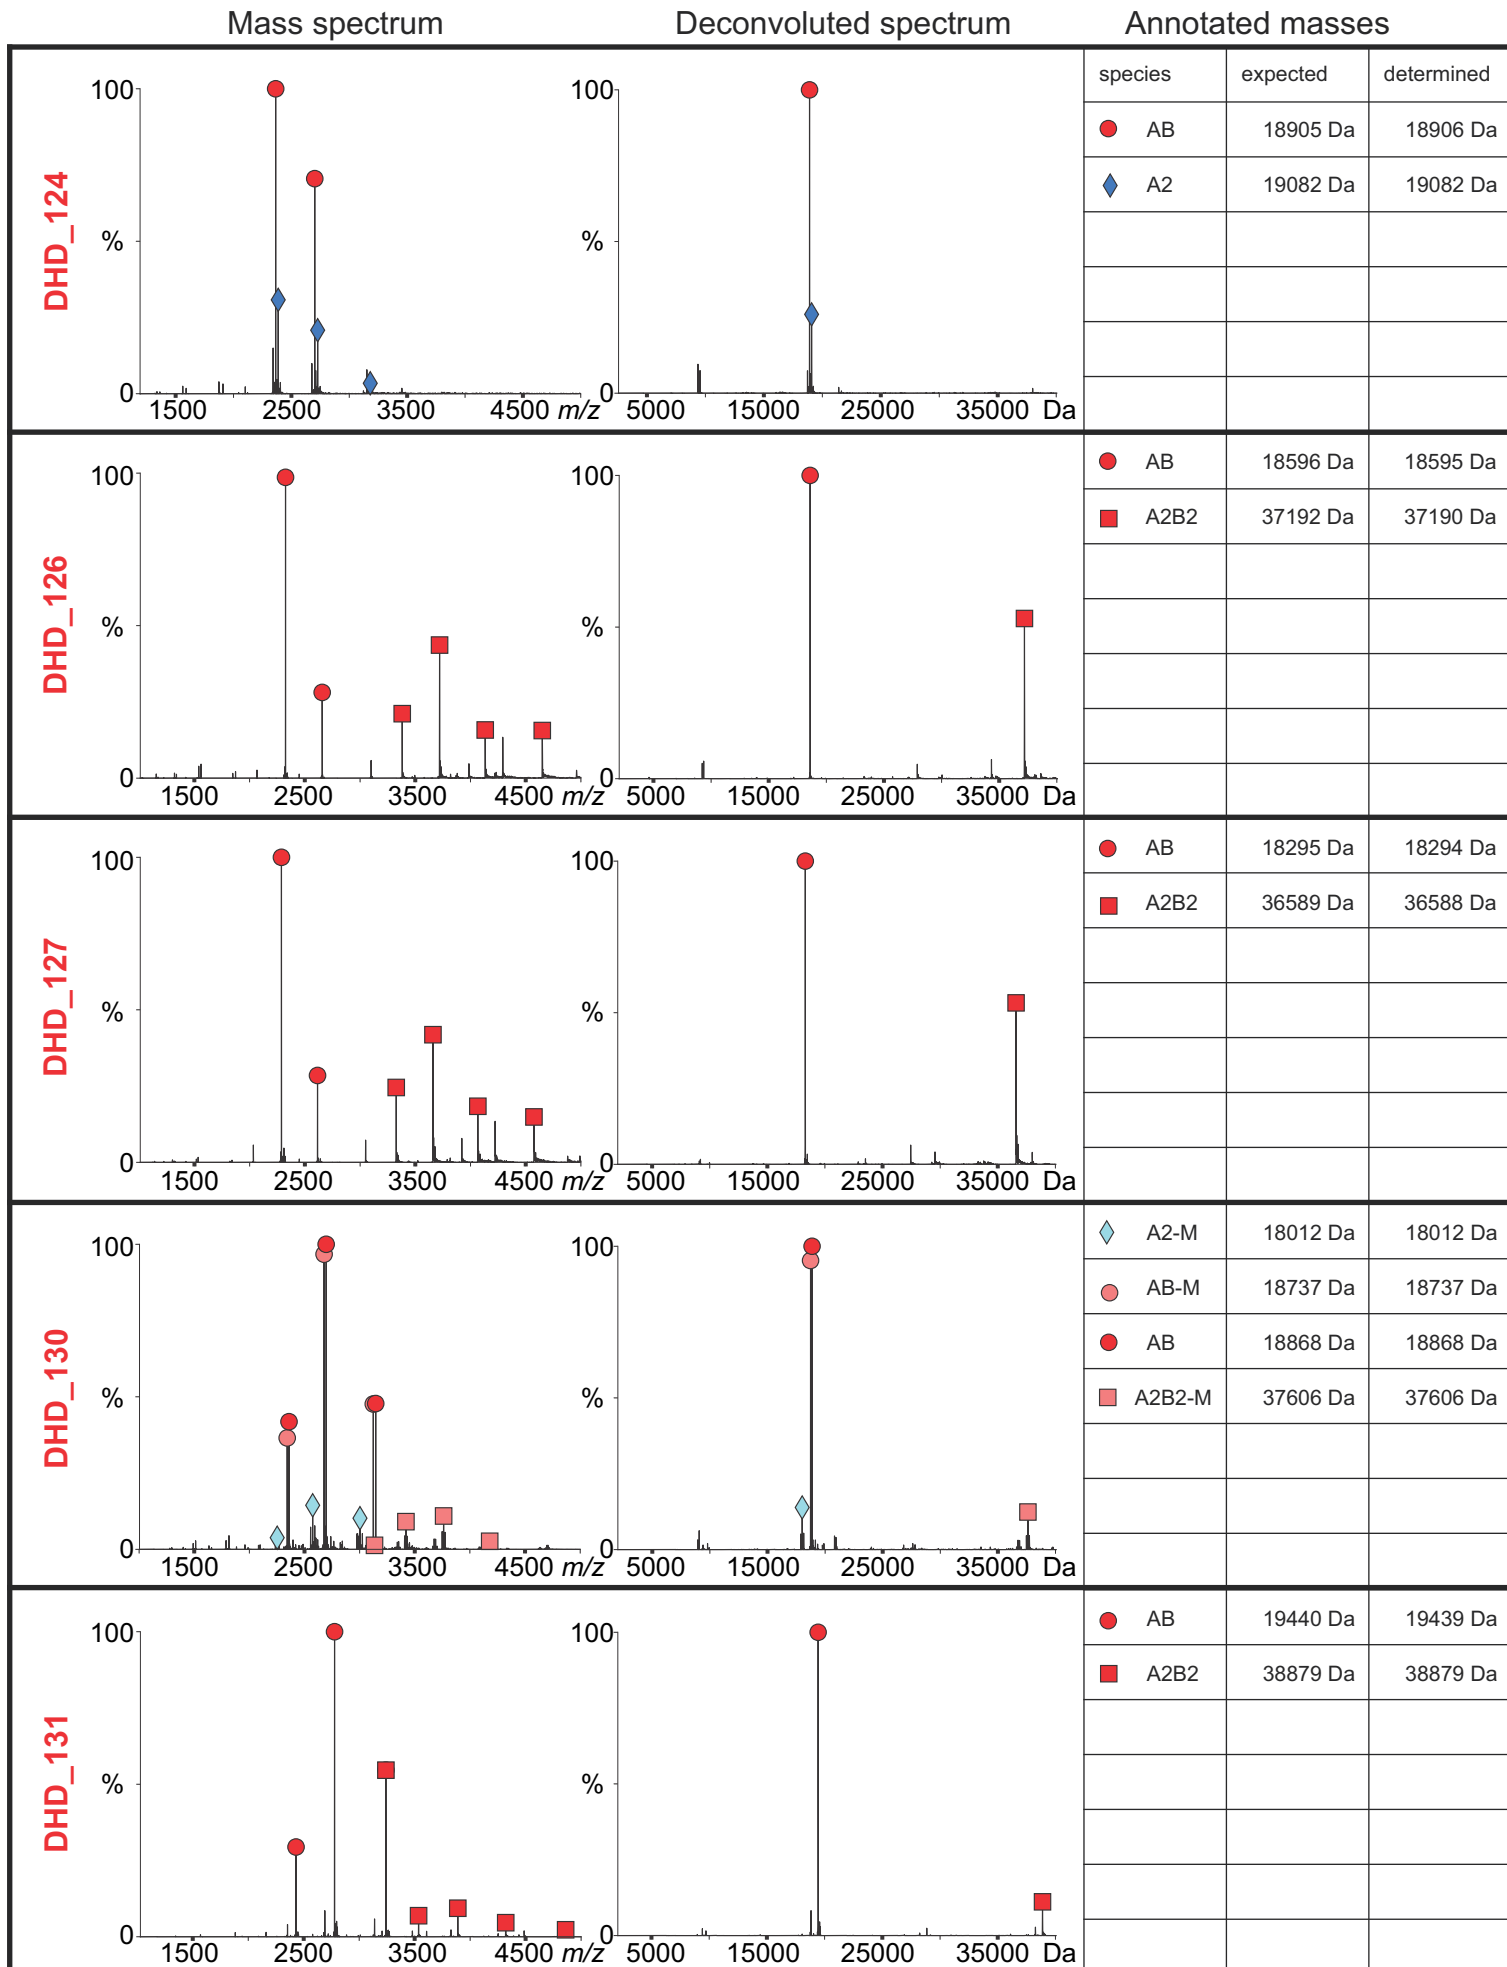

Mass spectrum

Deconvoluted spectrum

Annotated masses

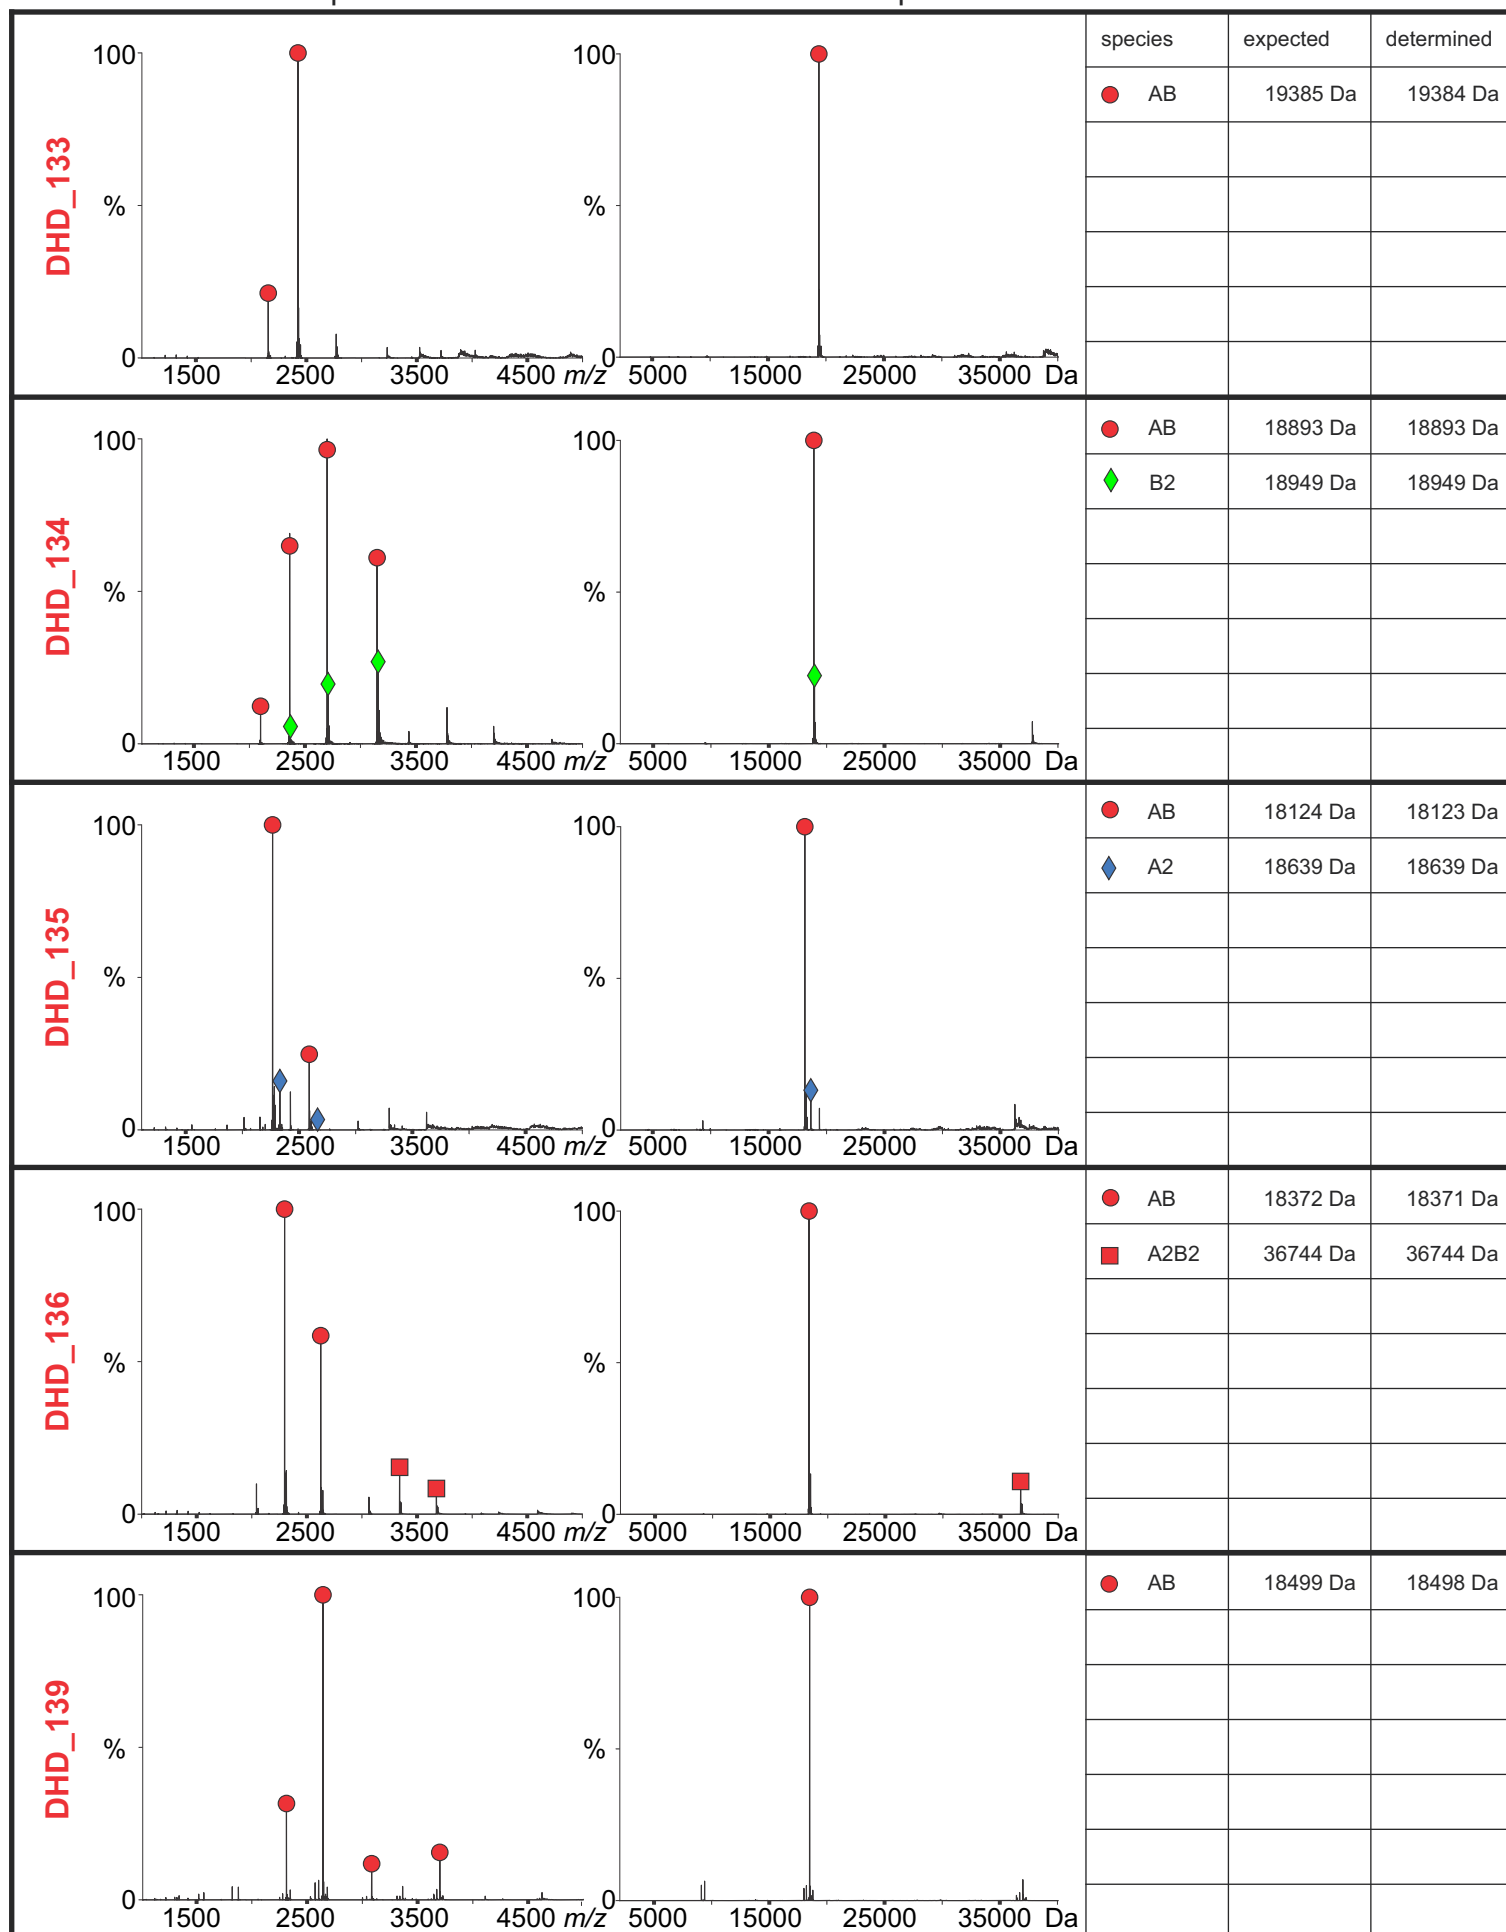

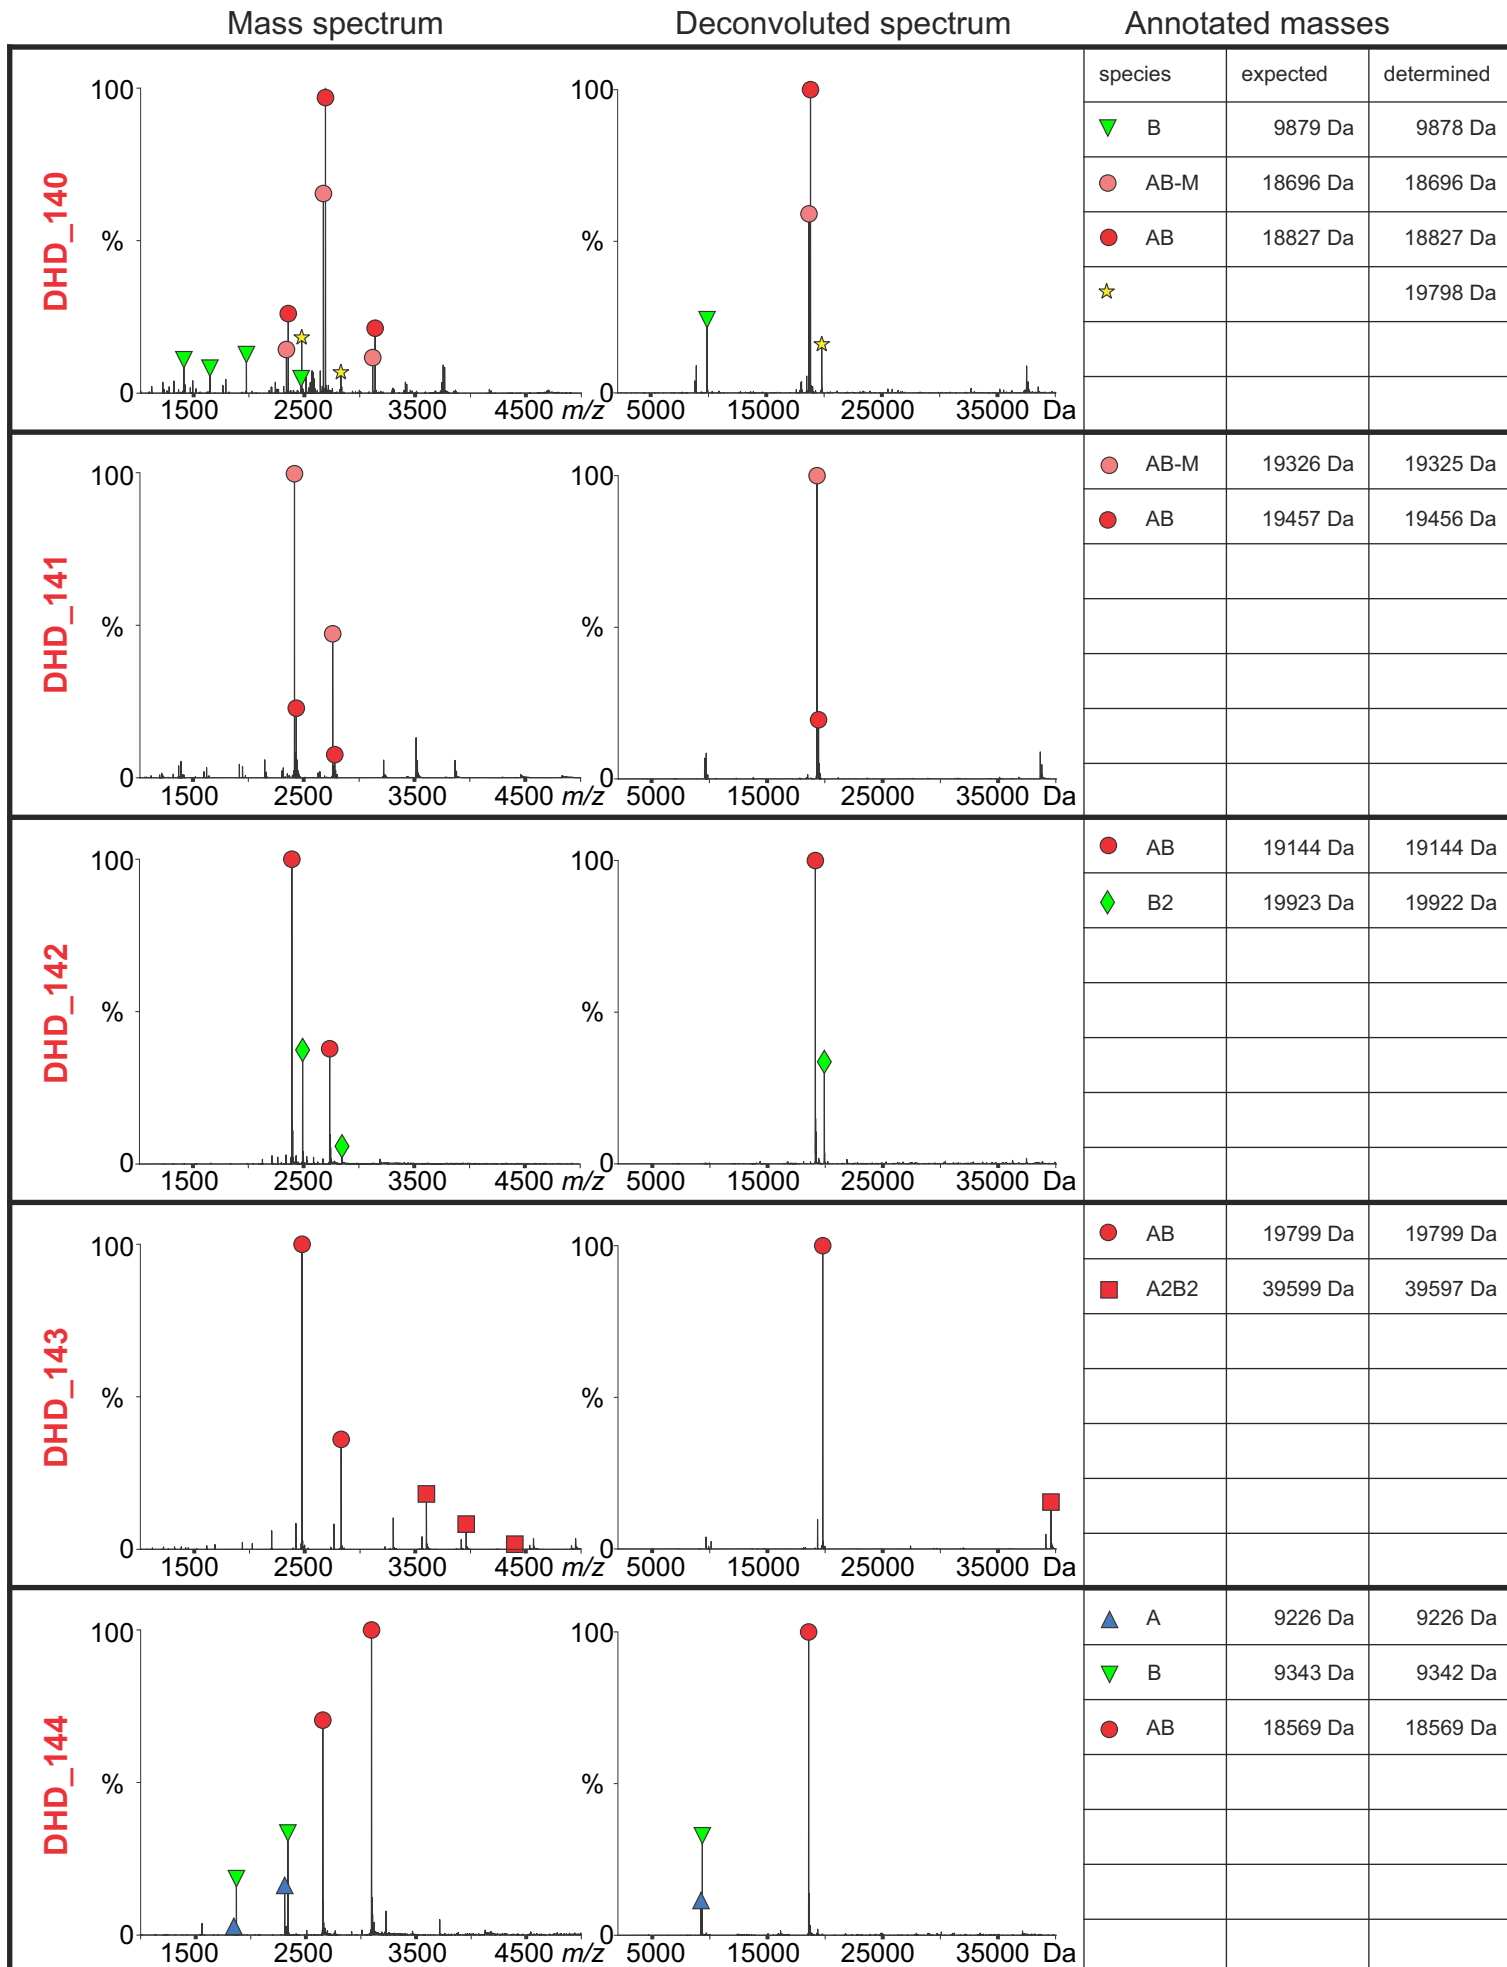

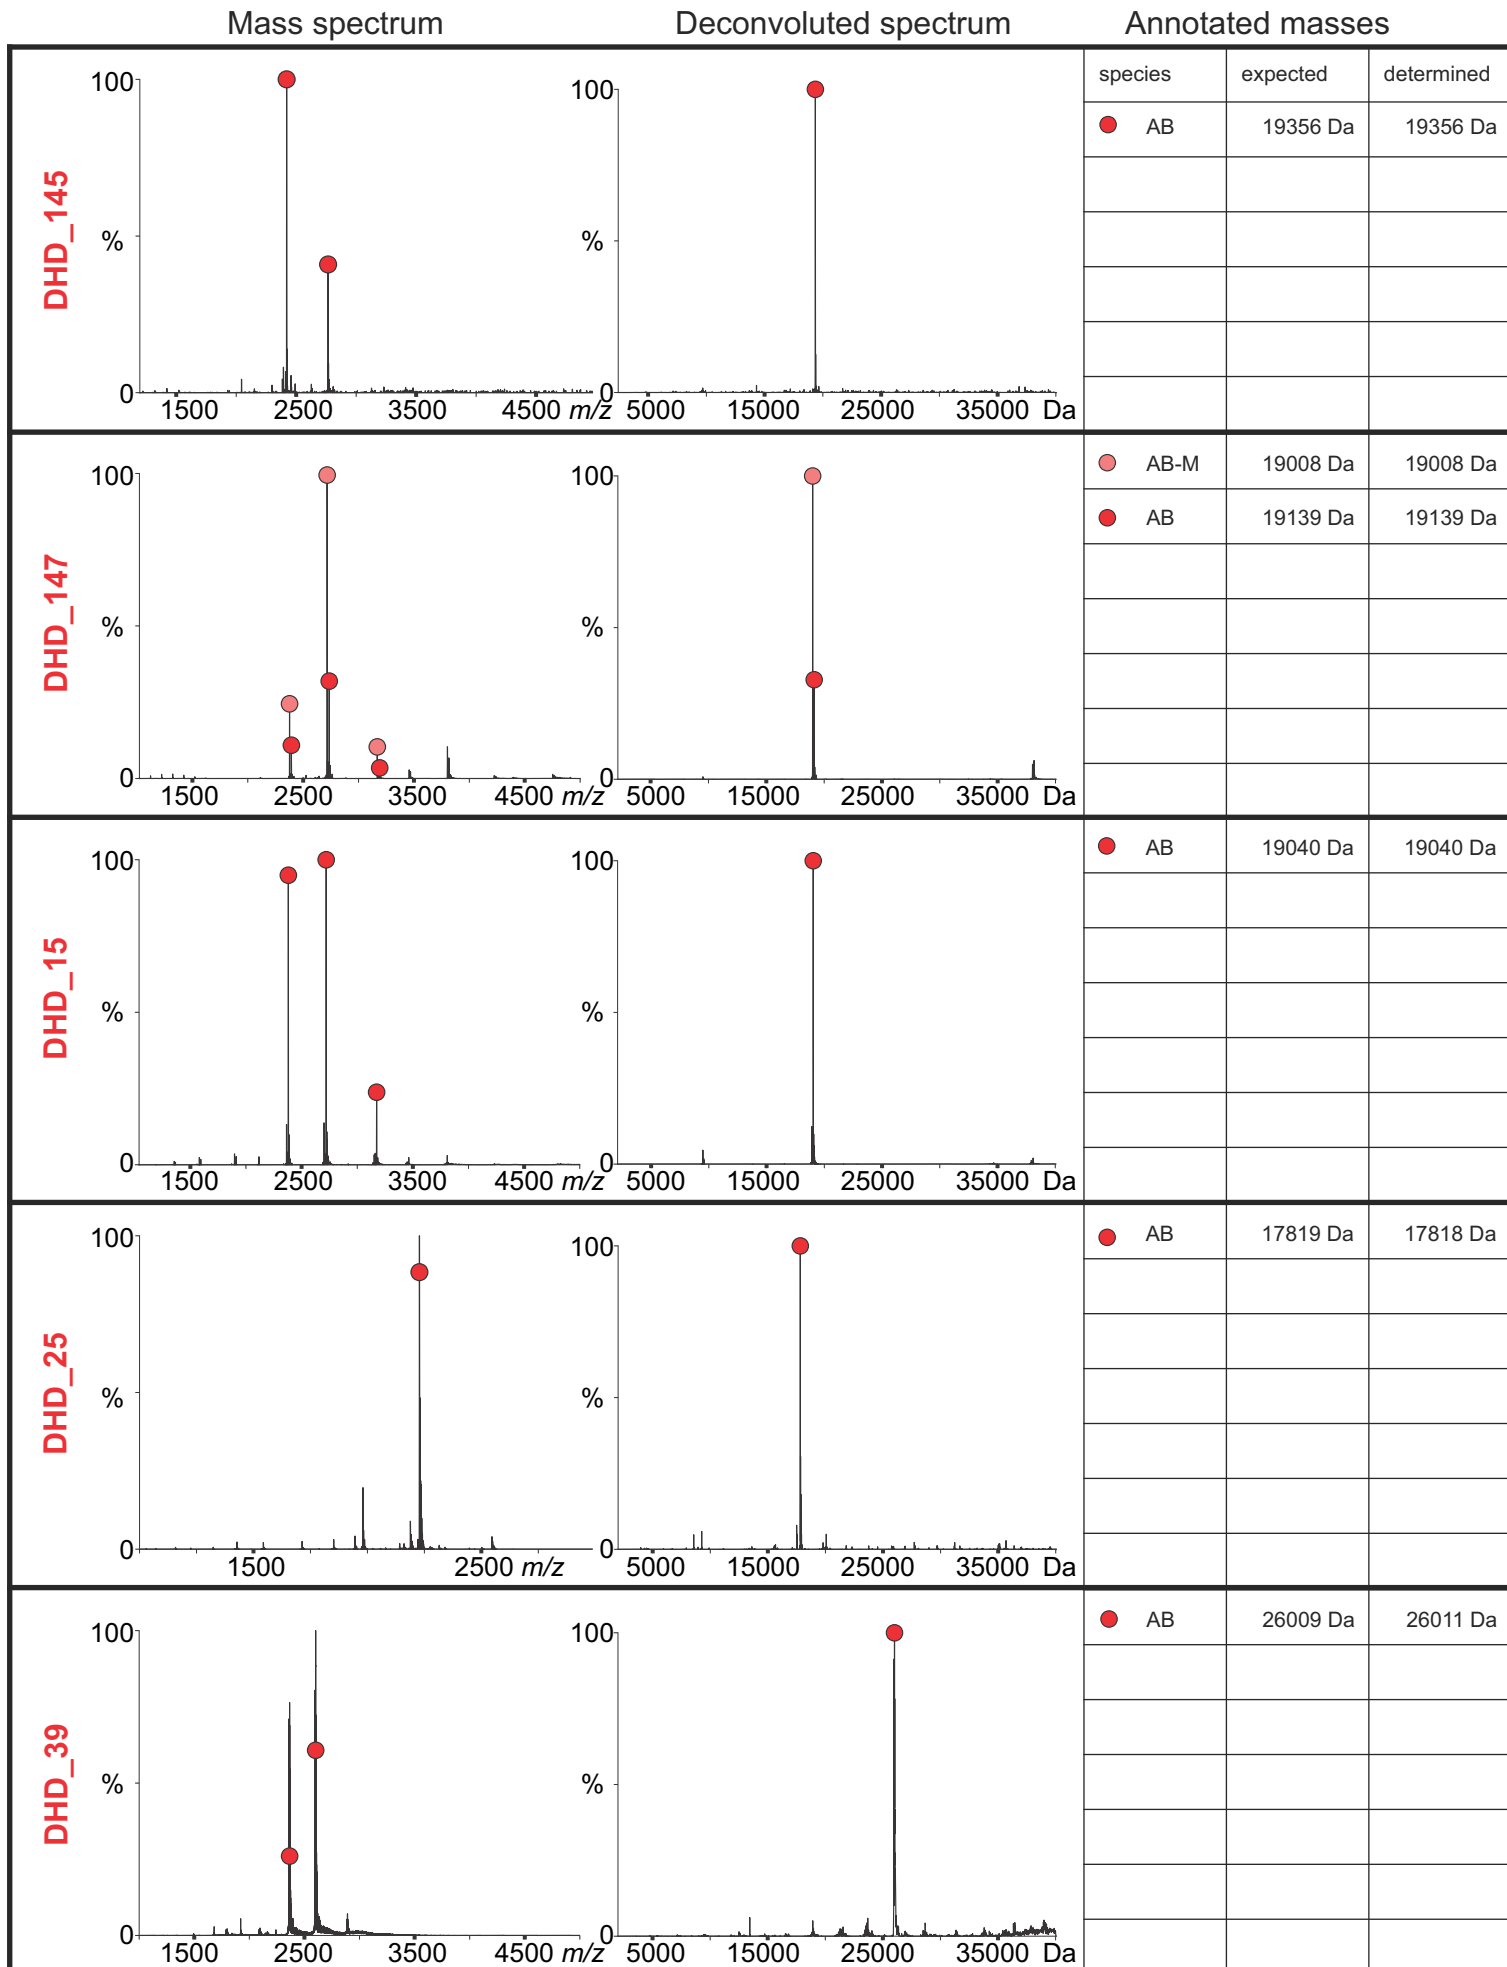

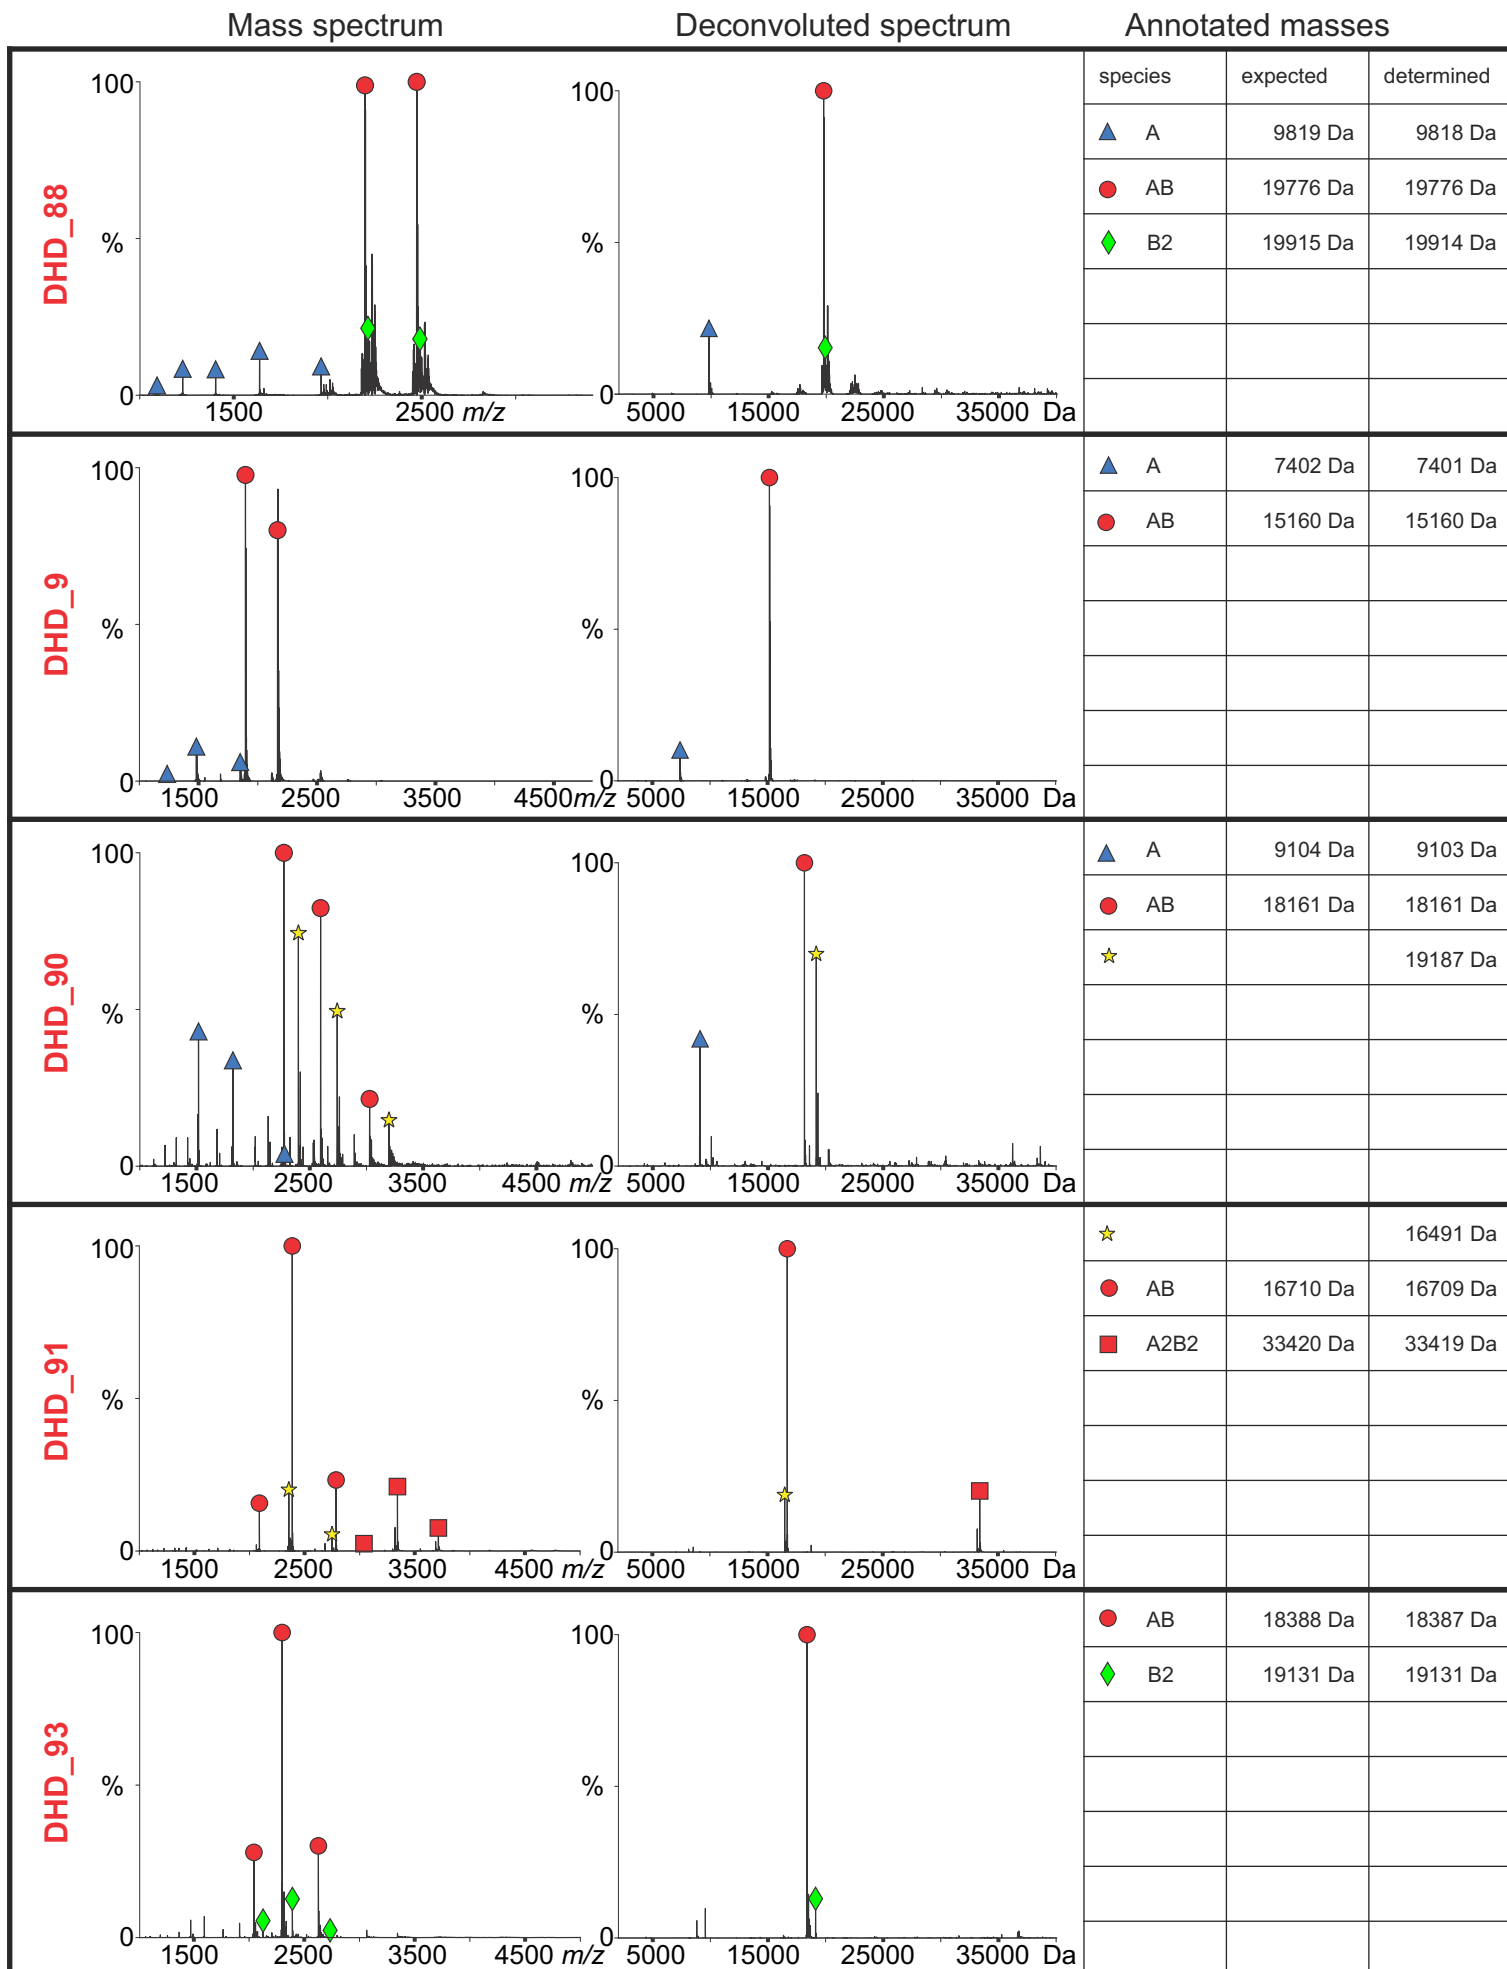



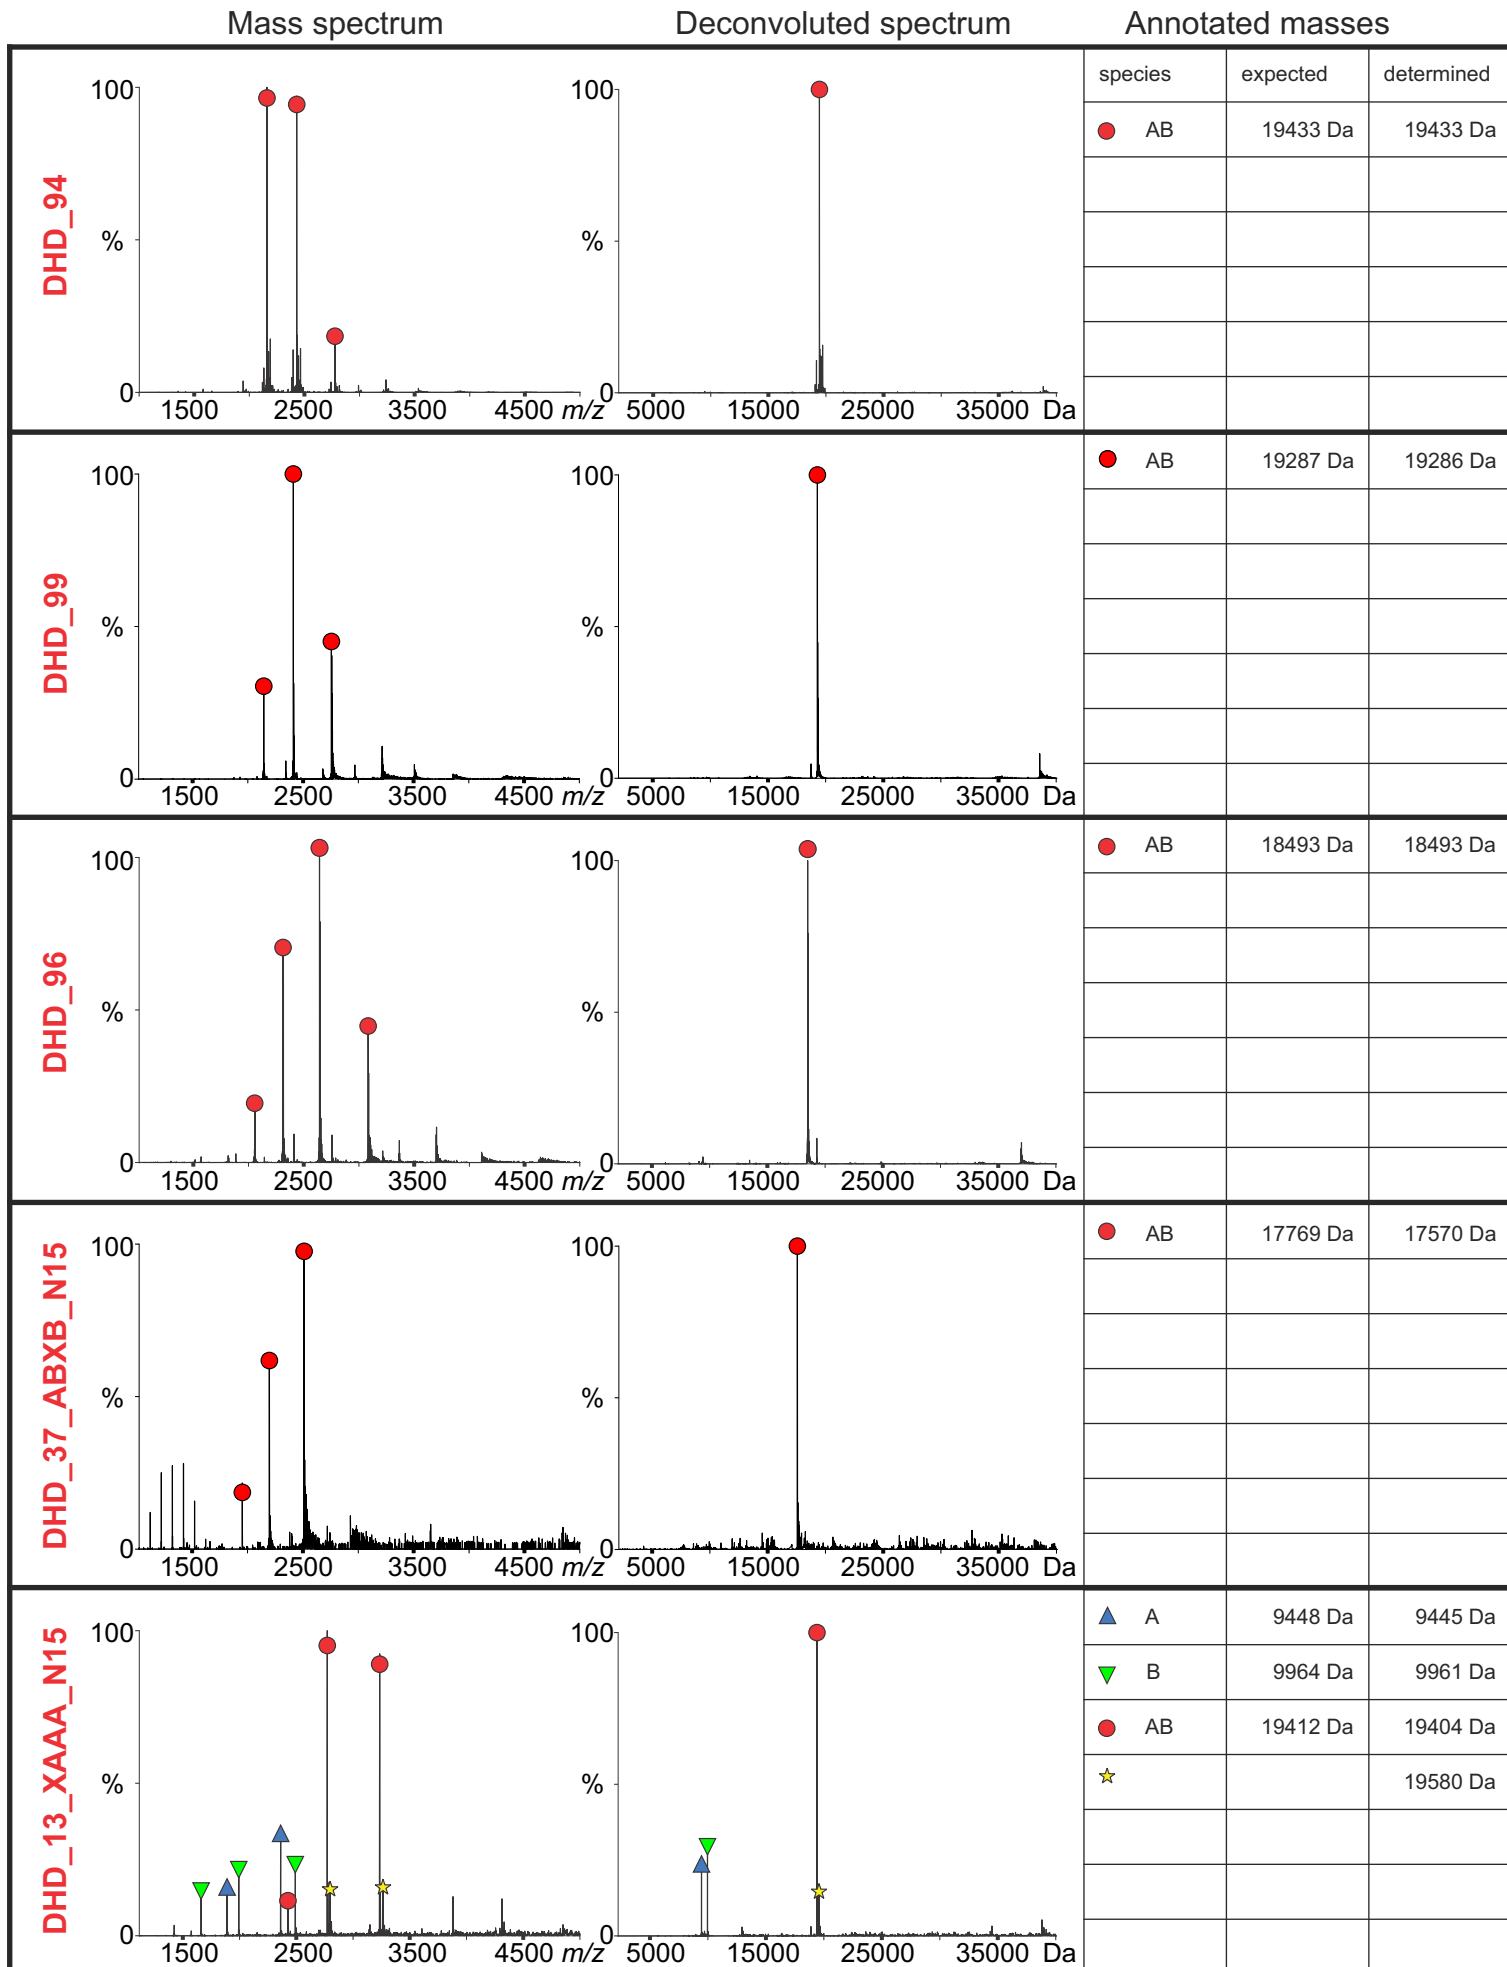

Mass spectrum

Deconvoluted spectrum

Annotated masses

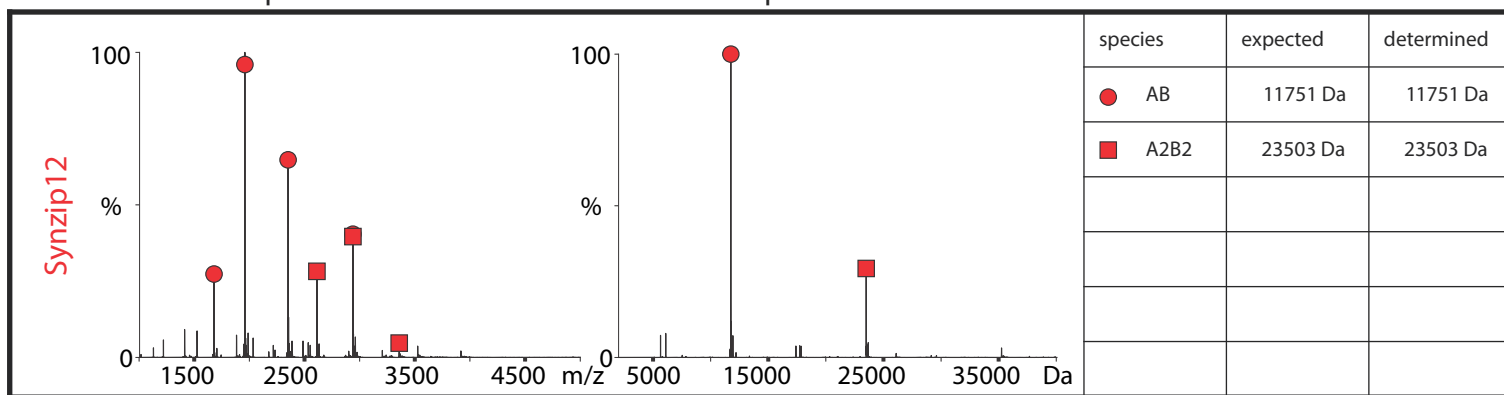

Supplement: NIHMS1025591-supplement-Sup_Table_4.pdf [file NIHMS1025591-supplement-Sup_Table_4.pdf]
