# Supplementary material
Source: PubMed Central journal article supplement (PMC6537907)

Mass spectrum

Deconvoluted spectrum

Annotated masses

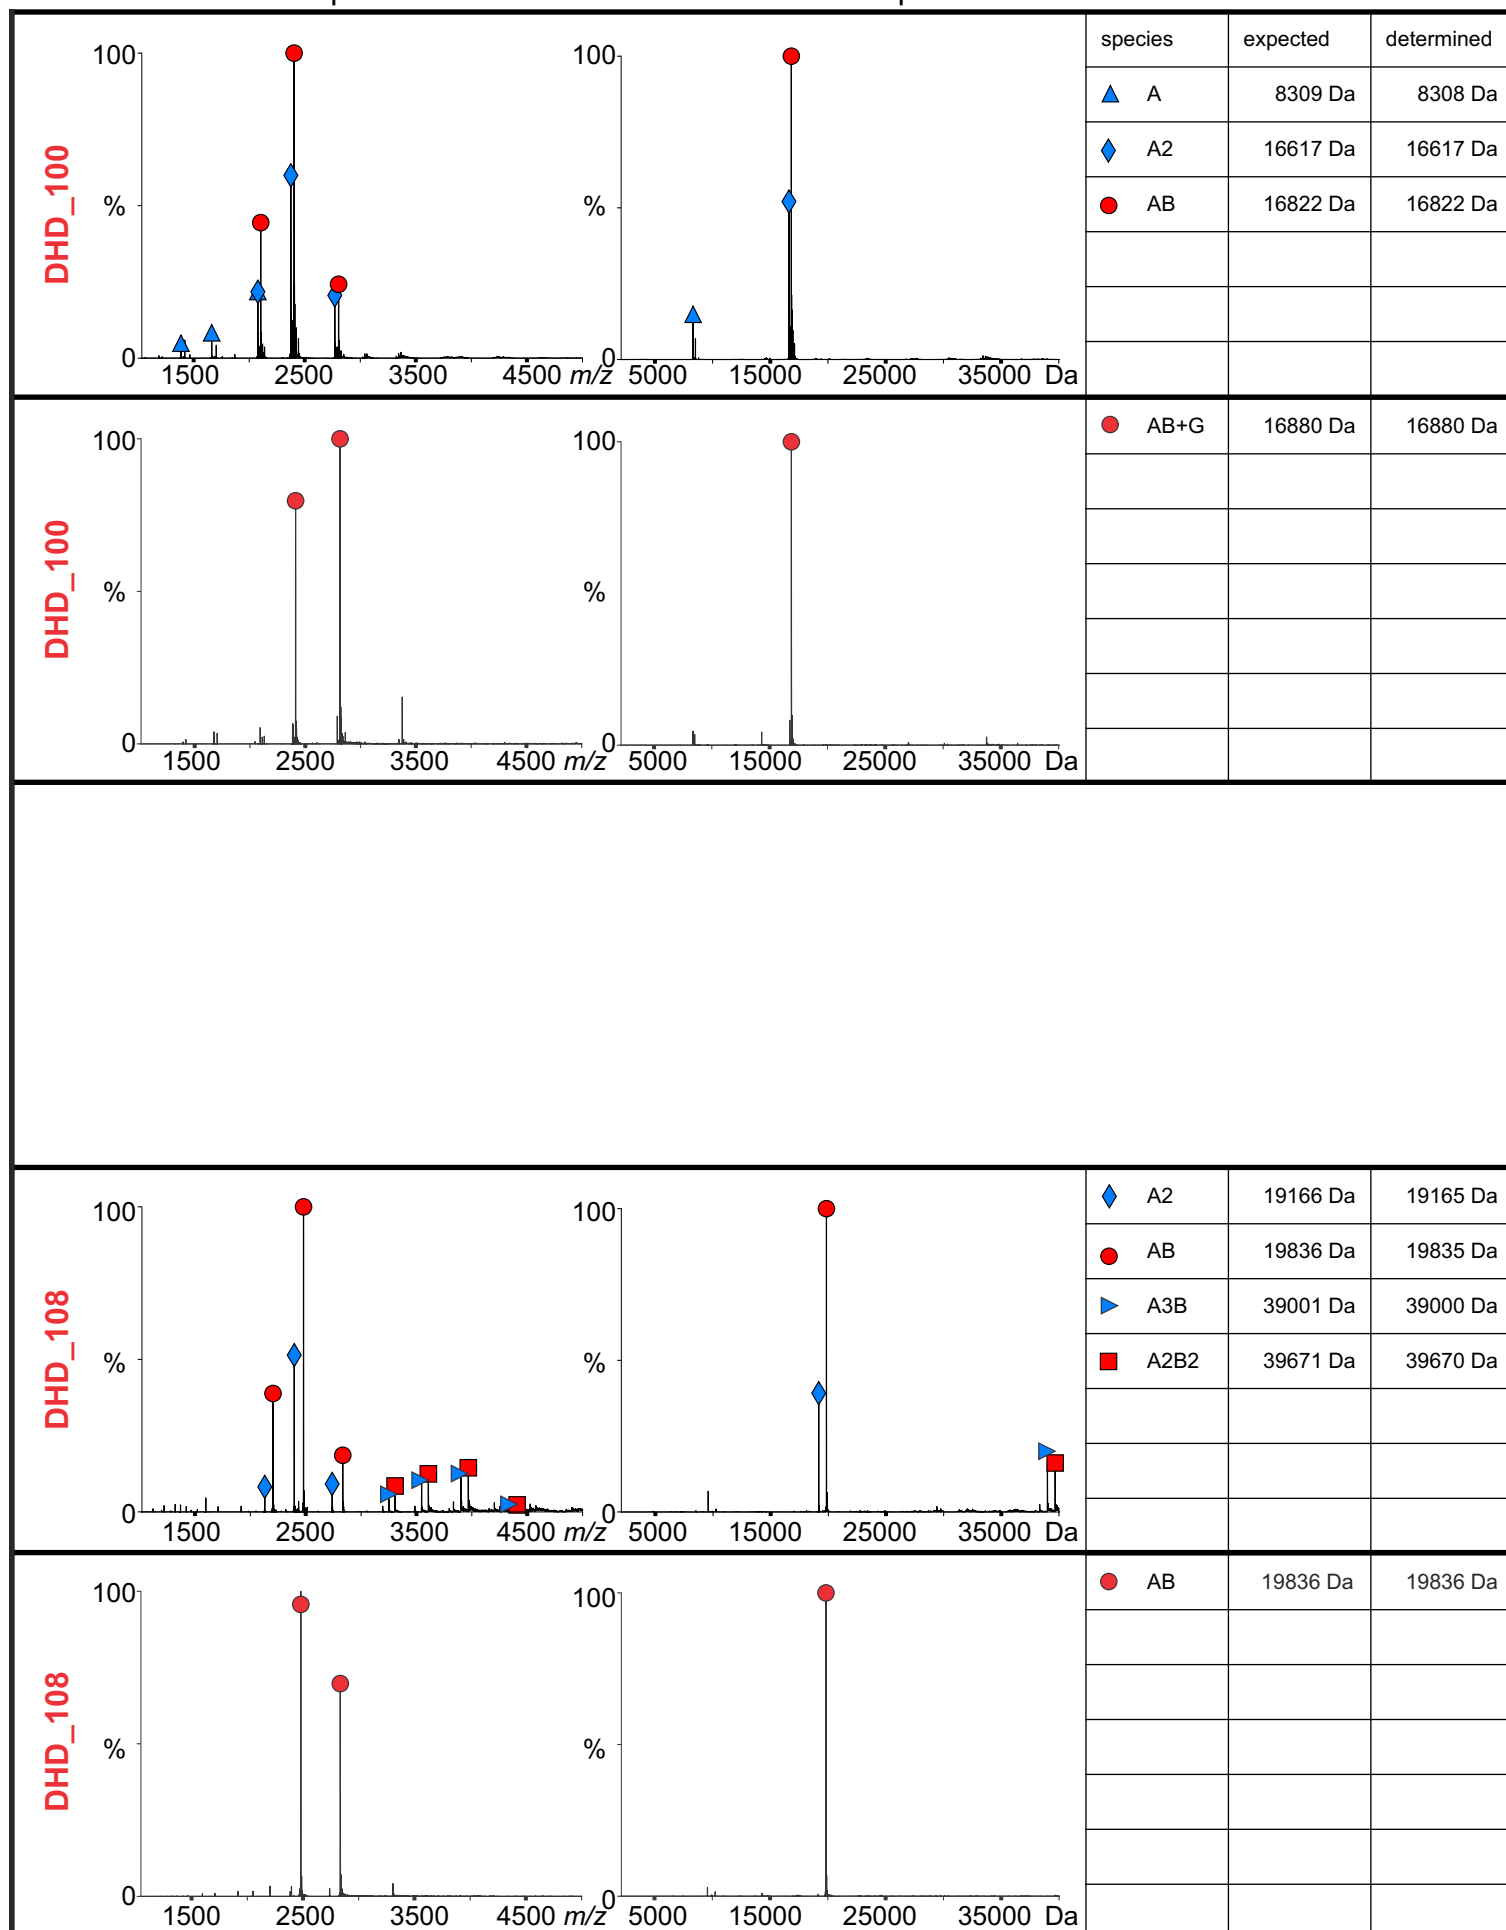

Mass spectrum

Deconvoluted spectrum

Annotated masses

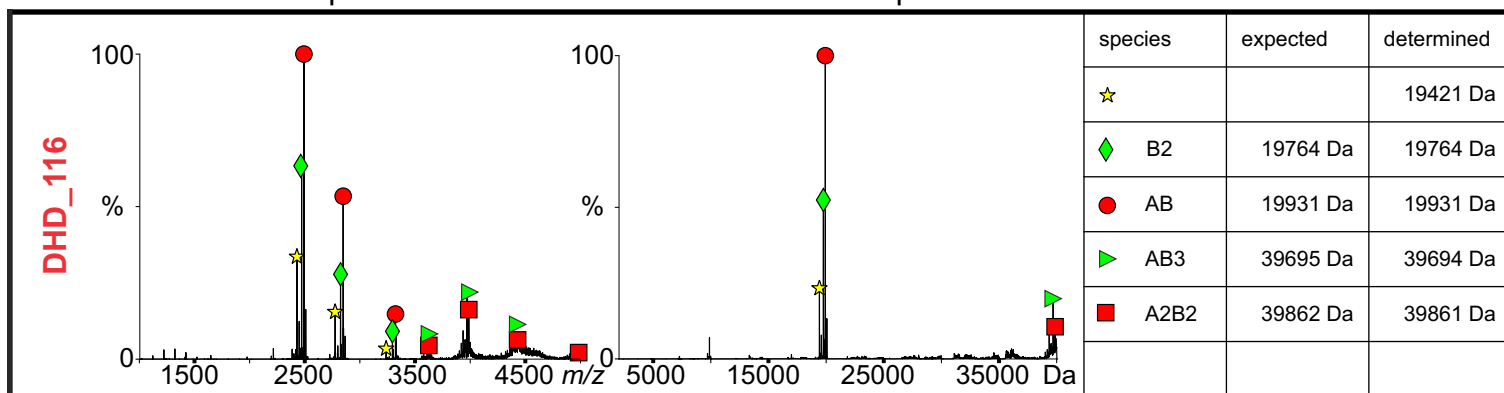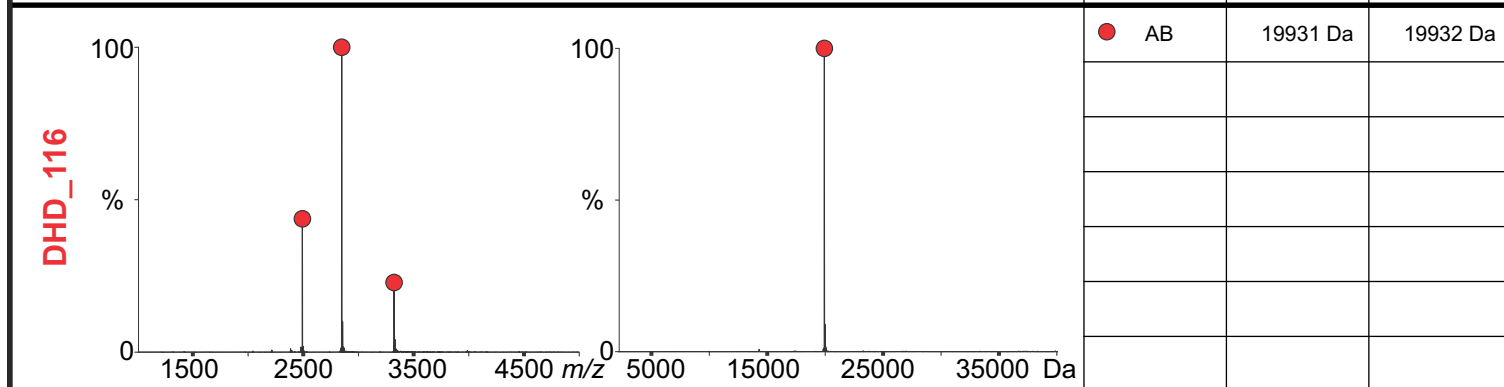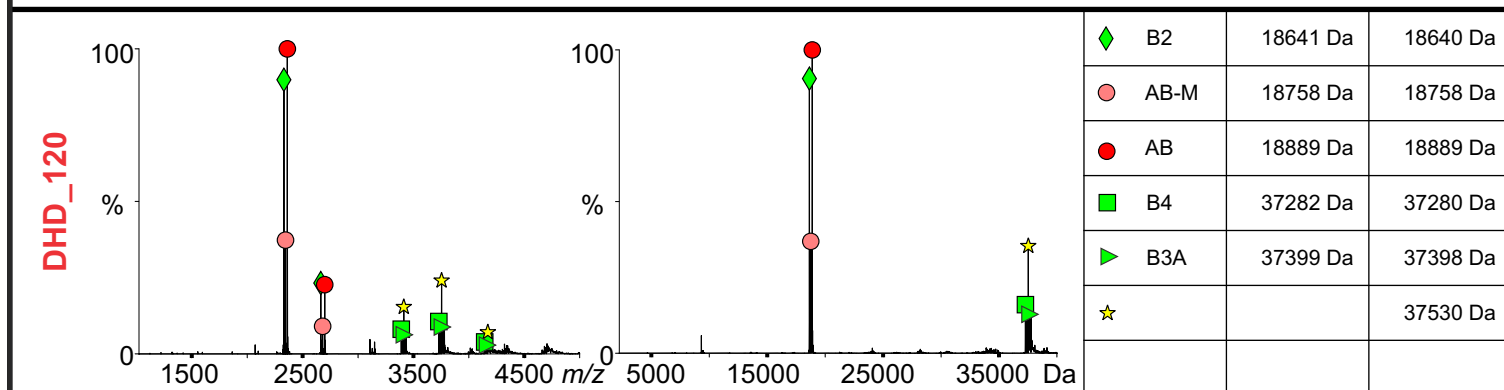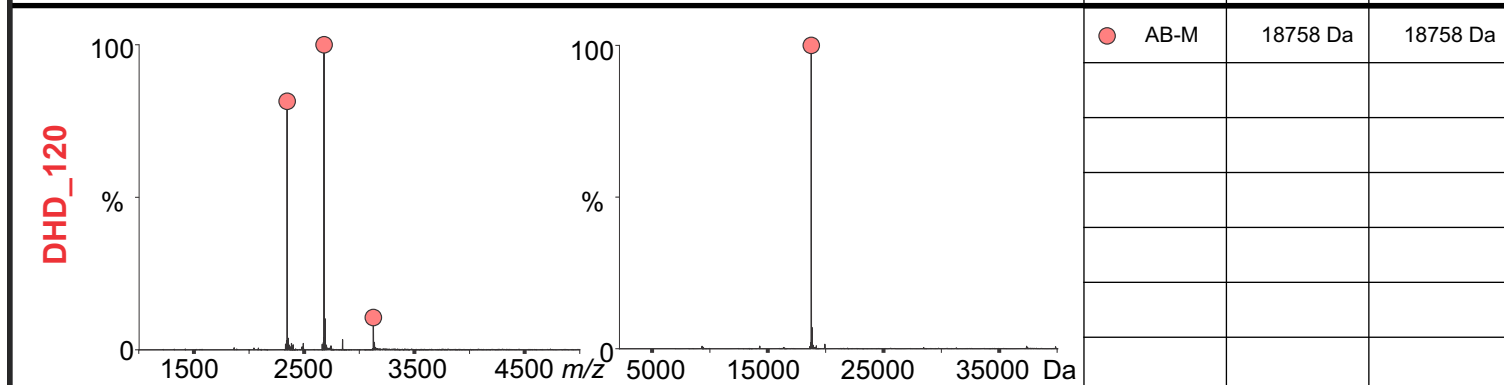

Mass spectrum

Deconvoluted spectrum

Annotated masses

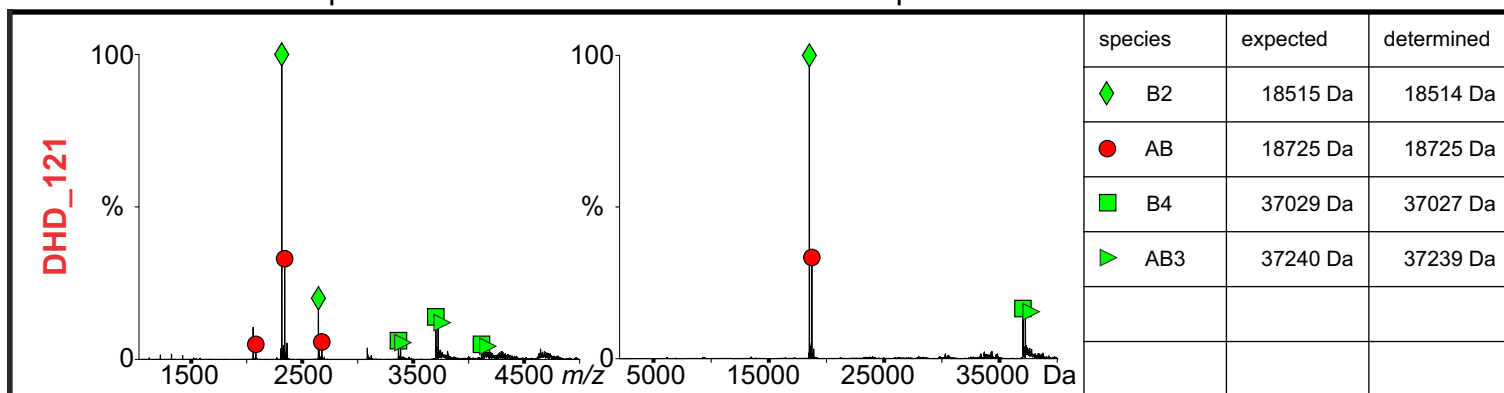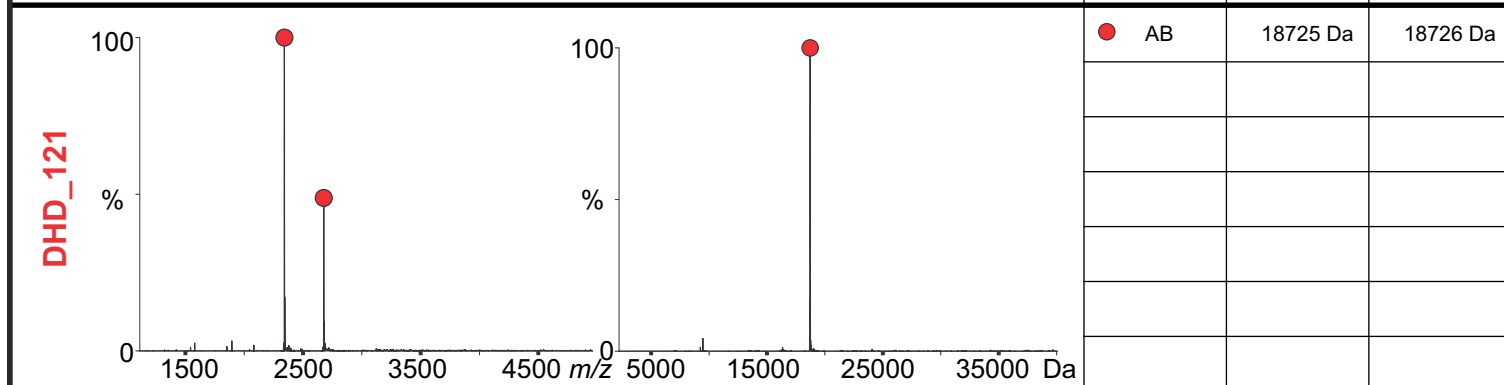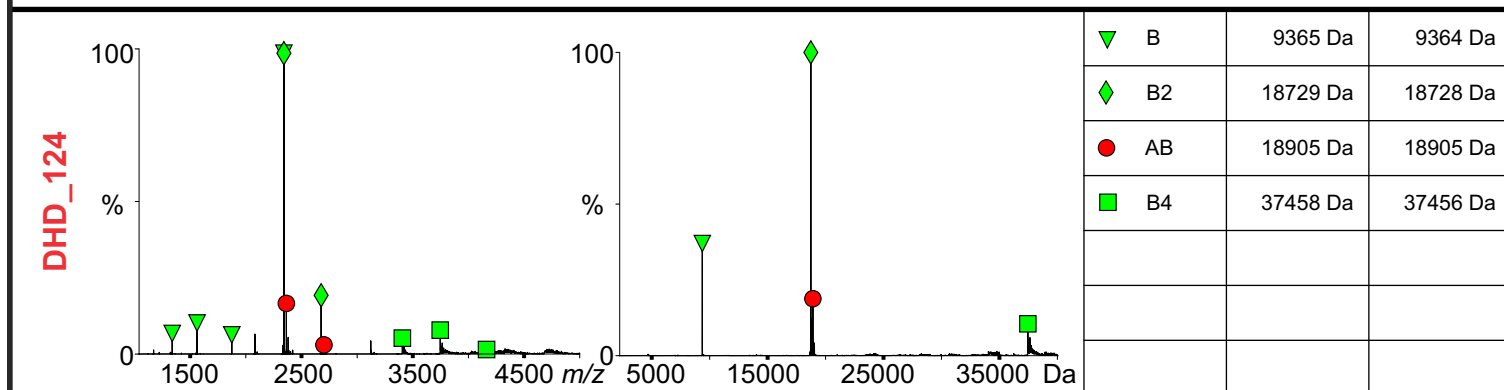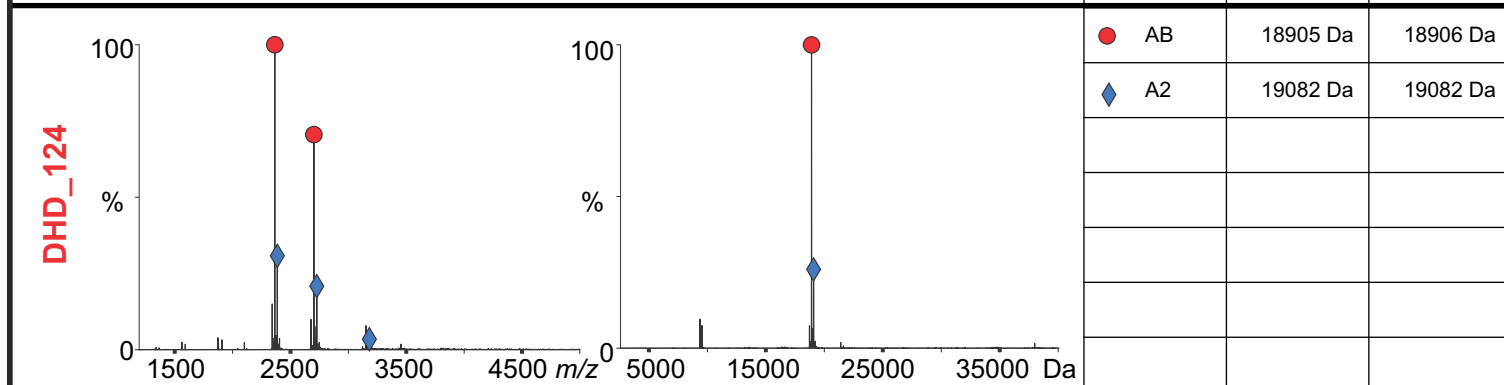

Mass spectrum

Deconvoluted spectrum

Annotated masses

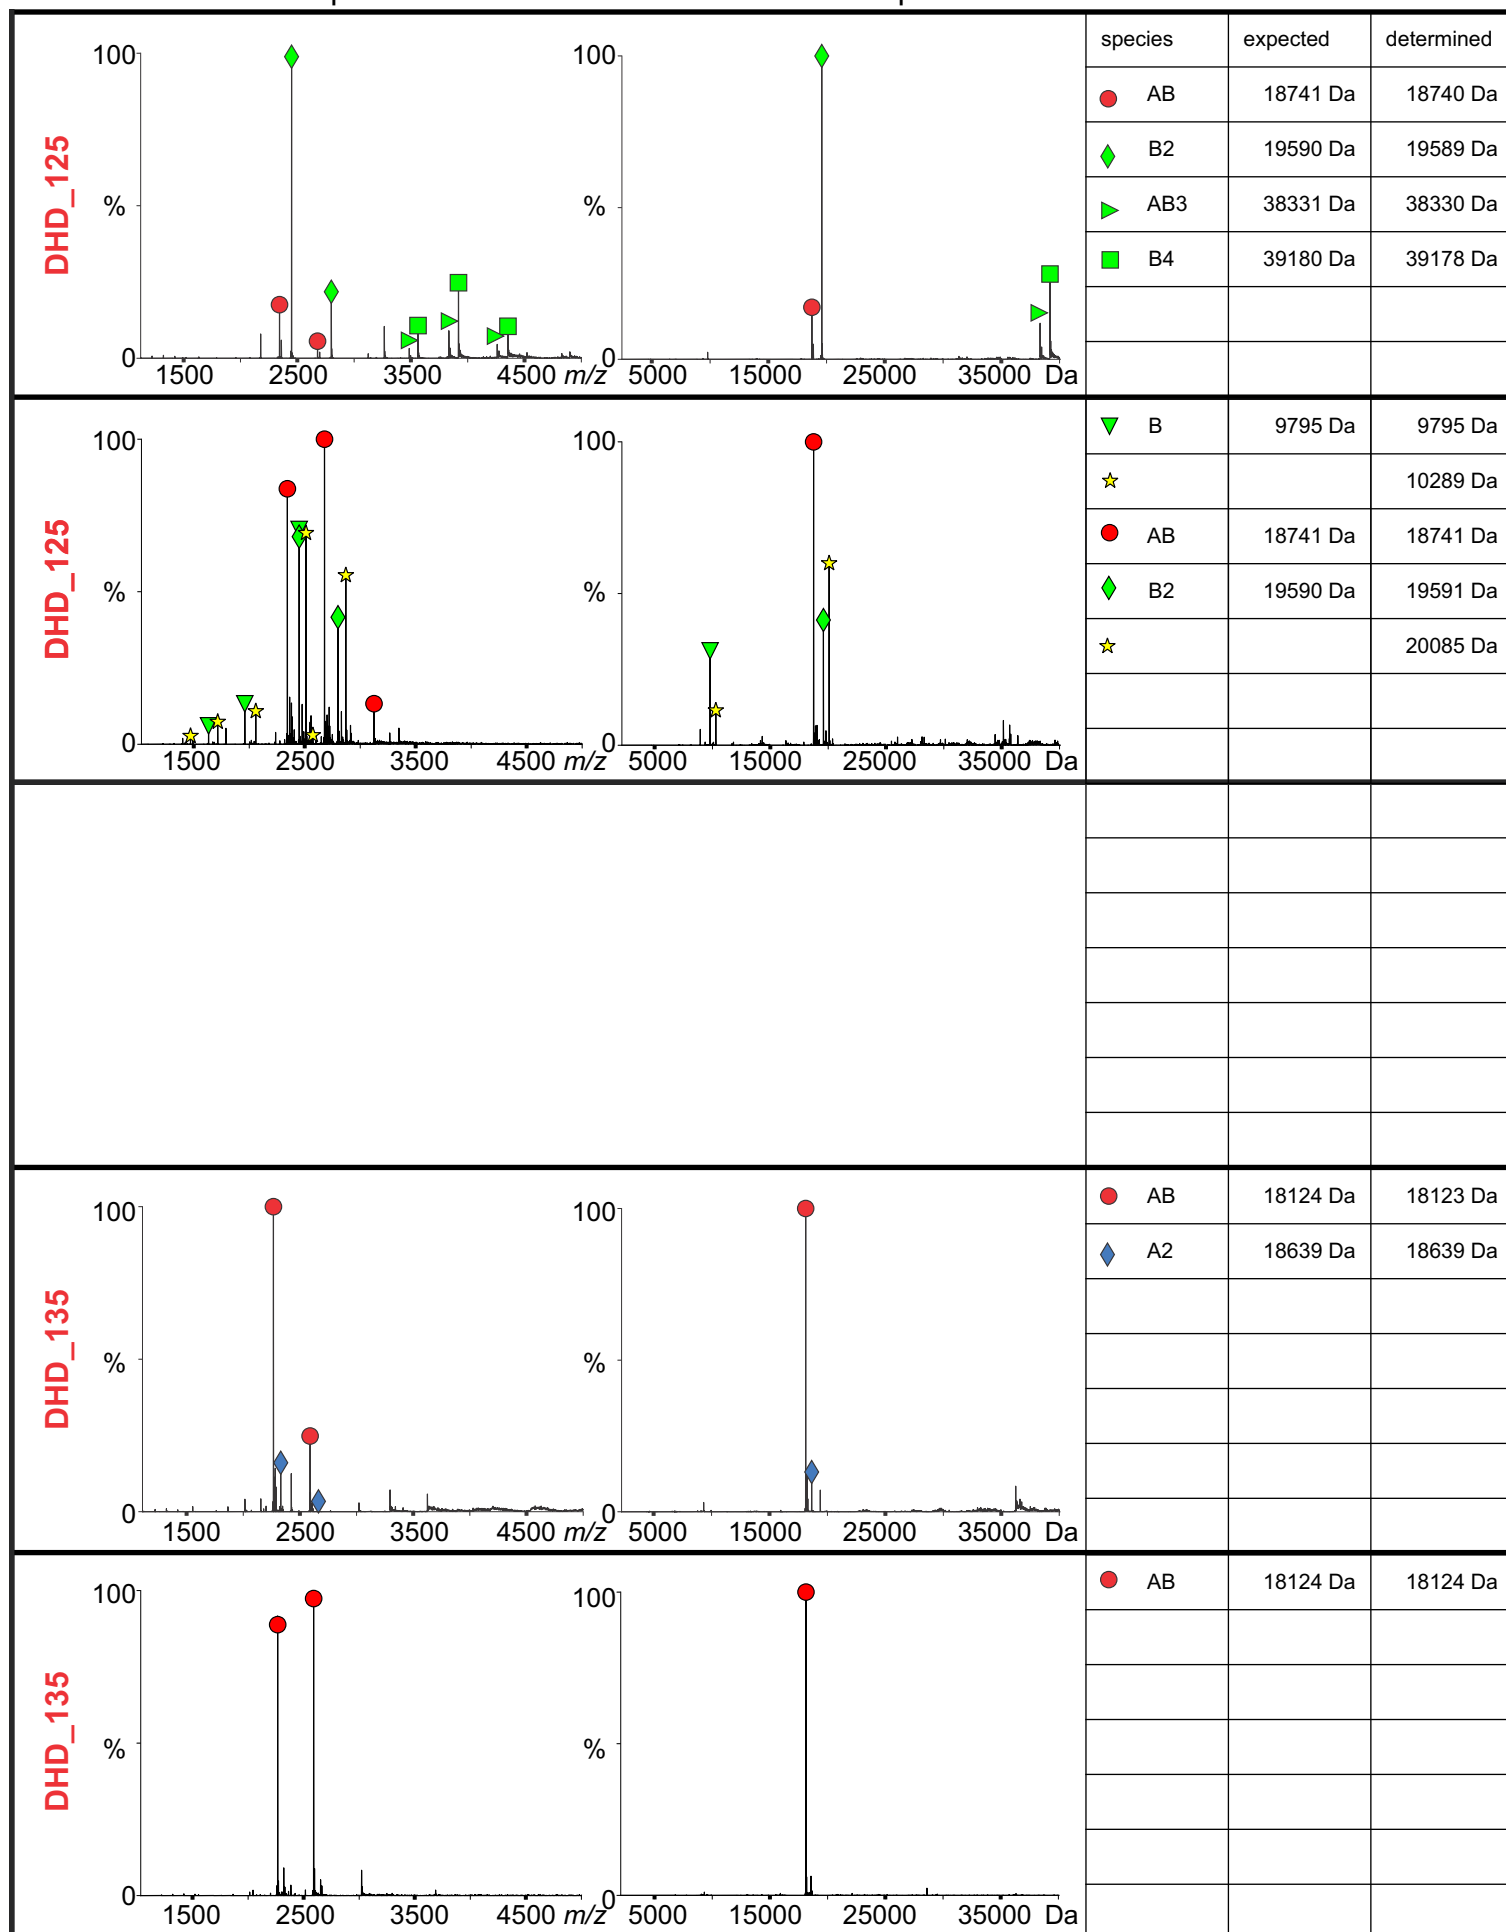

Mass spectrum

Deconvoluted spectrum

Annotated masses

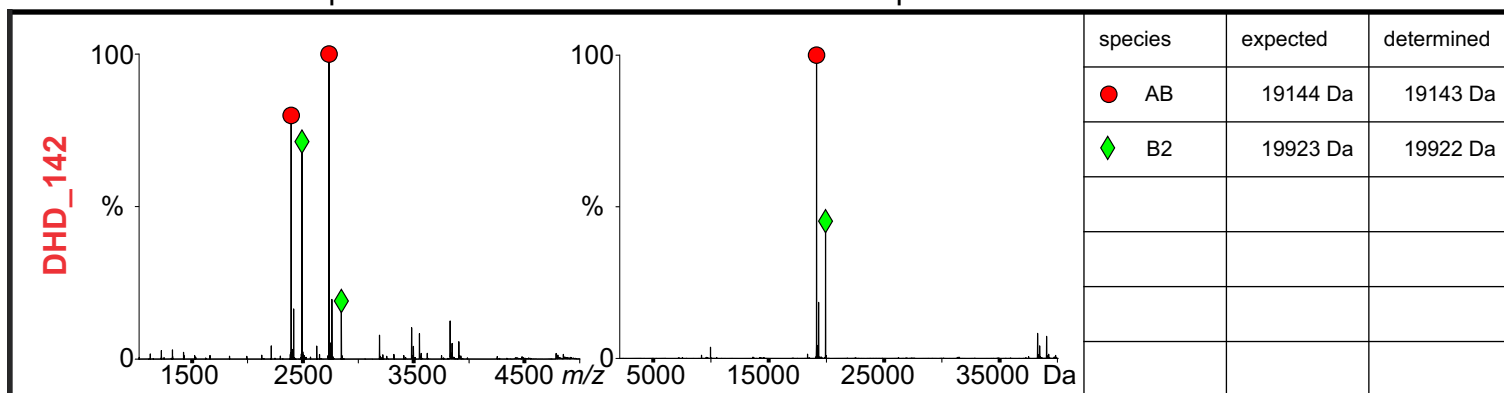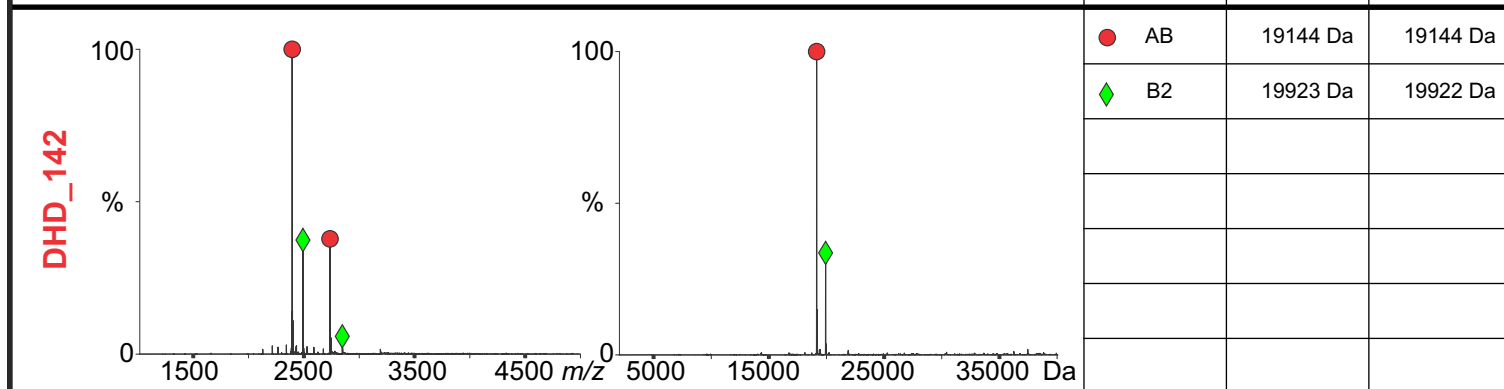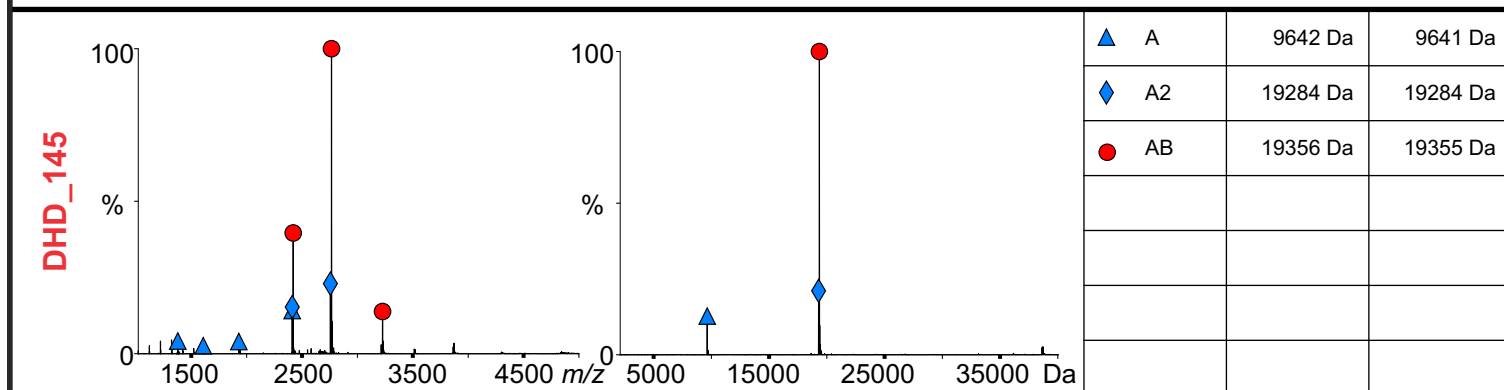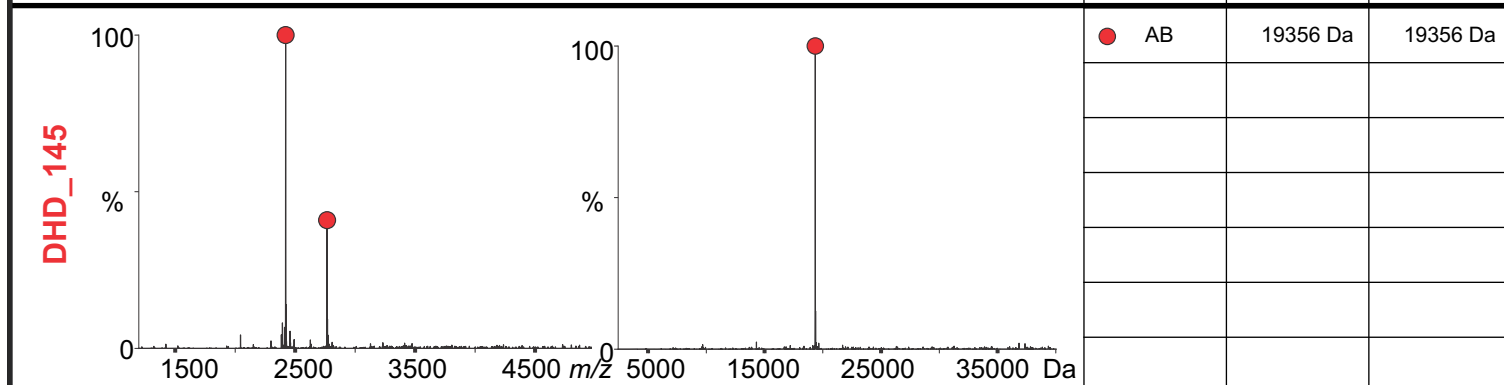

Supplement: NIHMS1025591-supplement-Sup_Table_6.pdf [file NIHMS1025591-supplement-Sup_Table_6.pdf]
