# Supplementary material
Source: PubMed Central journal article supplement (PMC6537907)
Supplement: NIHMS1025591-supplement-Sup_Table_9.pdf [file NIHMS1025591-supplement-Sup_Table_9.pdf]

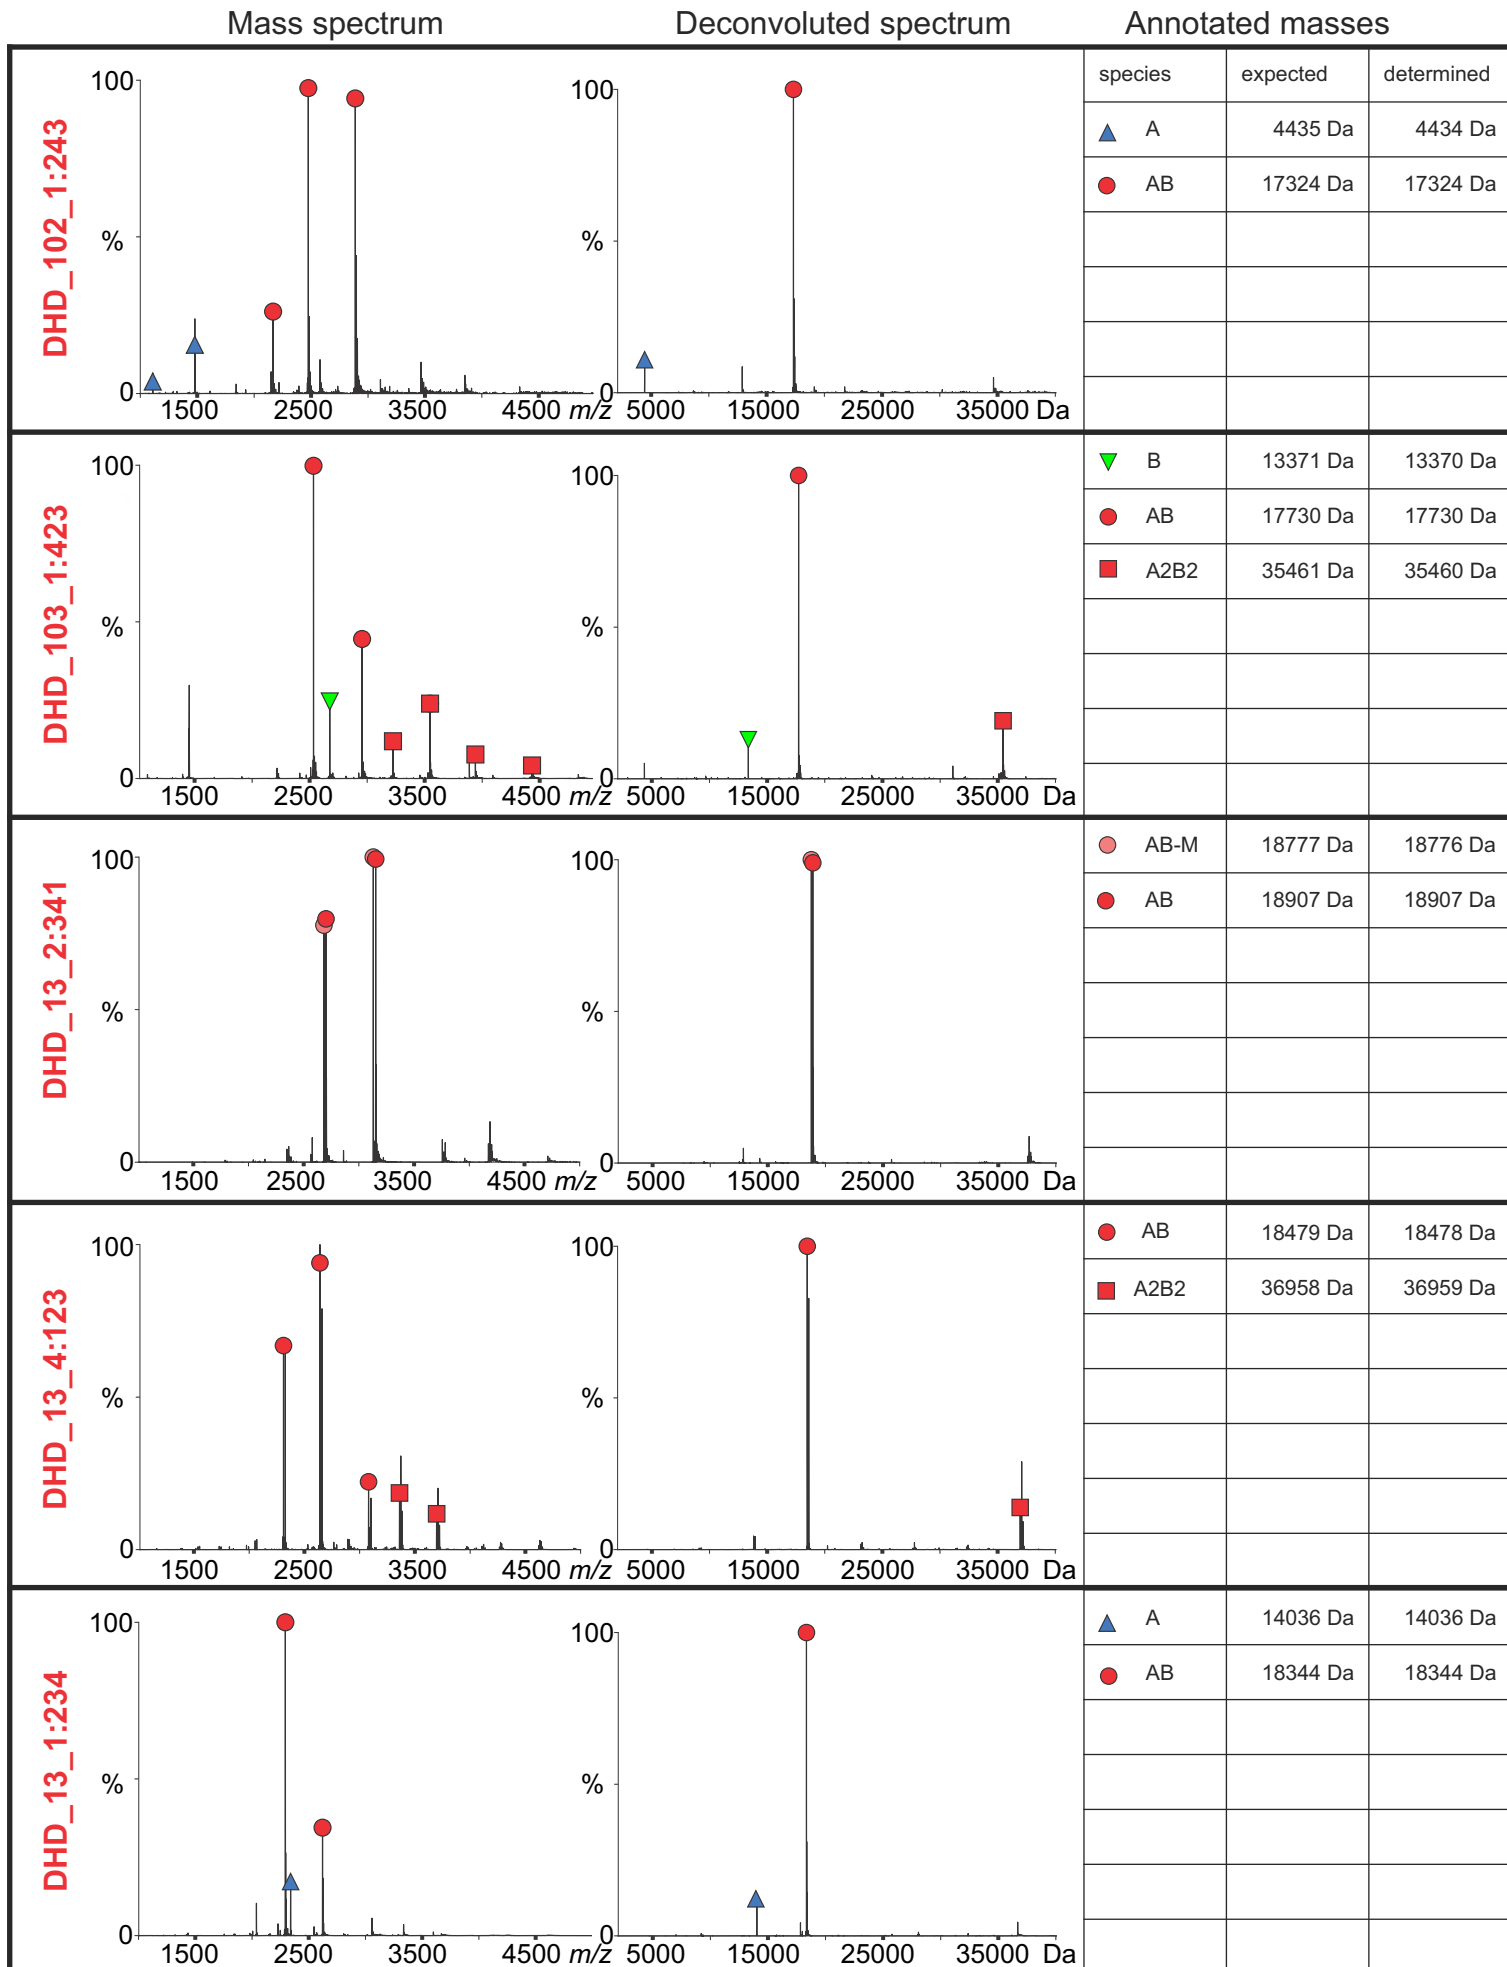

Mass spectrum

Deconvoluted spectrum

Annotated masses

|              | Mass spectrum | Deconvoluted spectrum | species | expected | determined |
|--------------|---------------|-----------------------|---------|----------|------------|
| DHD_37_3:124 |               |                       | ★       |          | 17526 Da   |
|              |               |                       | ● AB    | 18018 Da | 18155 Da   |
| DHD_37_1:234 |               |                       | ★       |          | 12883 Da   |
|              |               |                       | ▼ B     | 13866 Da | 13866 Da   |
|              |               |                       | ● AB    | 18027 Da | 18033 Da   |
| DHD_94_3:214 |               |                       | ● AB-M  | 20120 Da | 20119 Da   |
|              |               |                       | ● AB    | 20251 Da | 20250 Da   |
| DHD_94_2:143 |               |                       | ● AB    | 20132 Da | 20131 Da   |
