# Supplementary material
Source: PubMed Central journal article supplement (PMC6537907)

Mass spectrum

Deconvoluted spectrum

Annotated masses

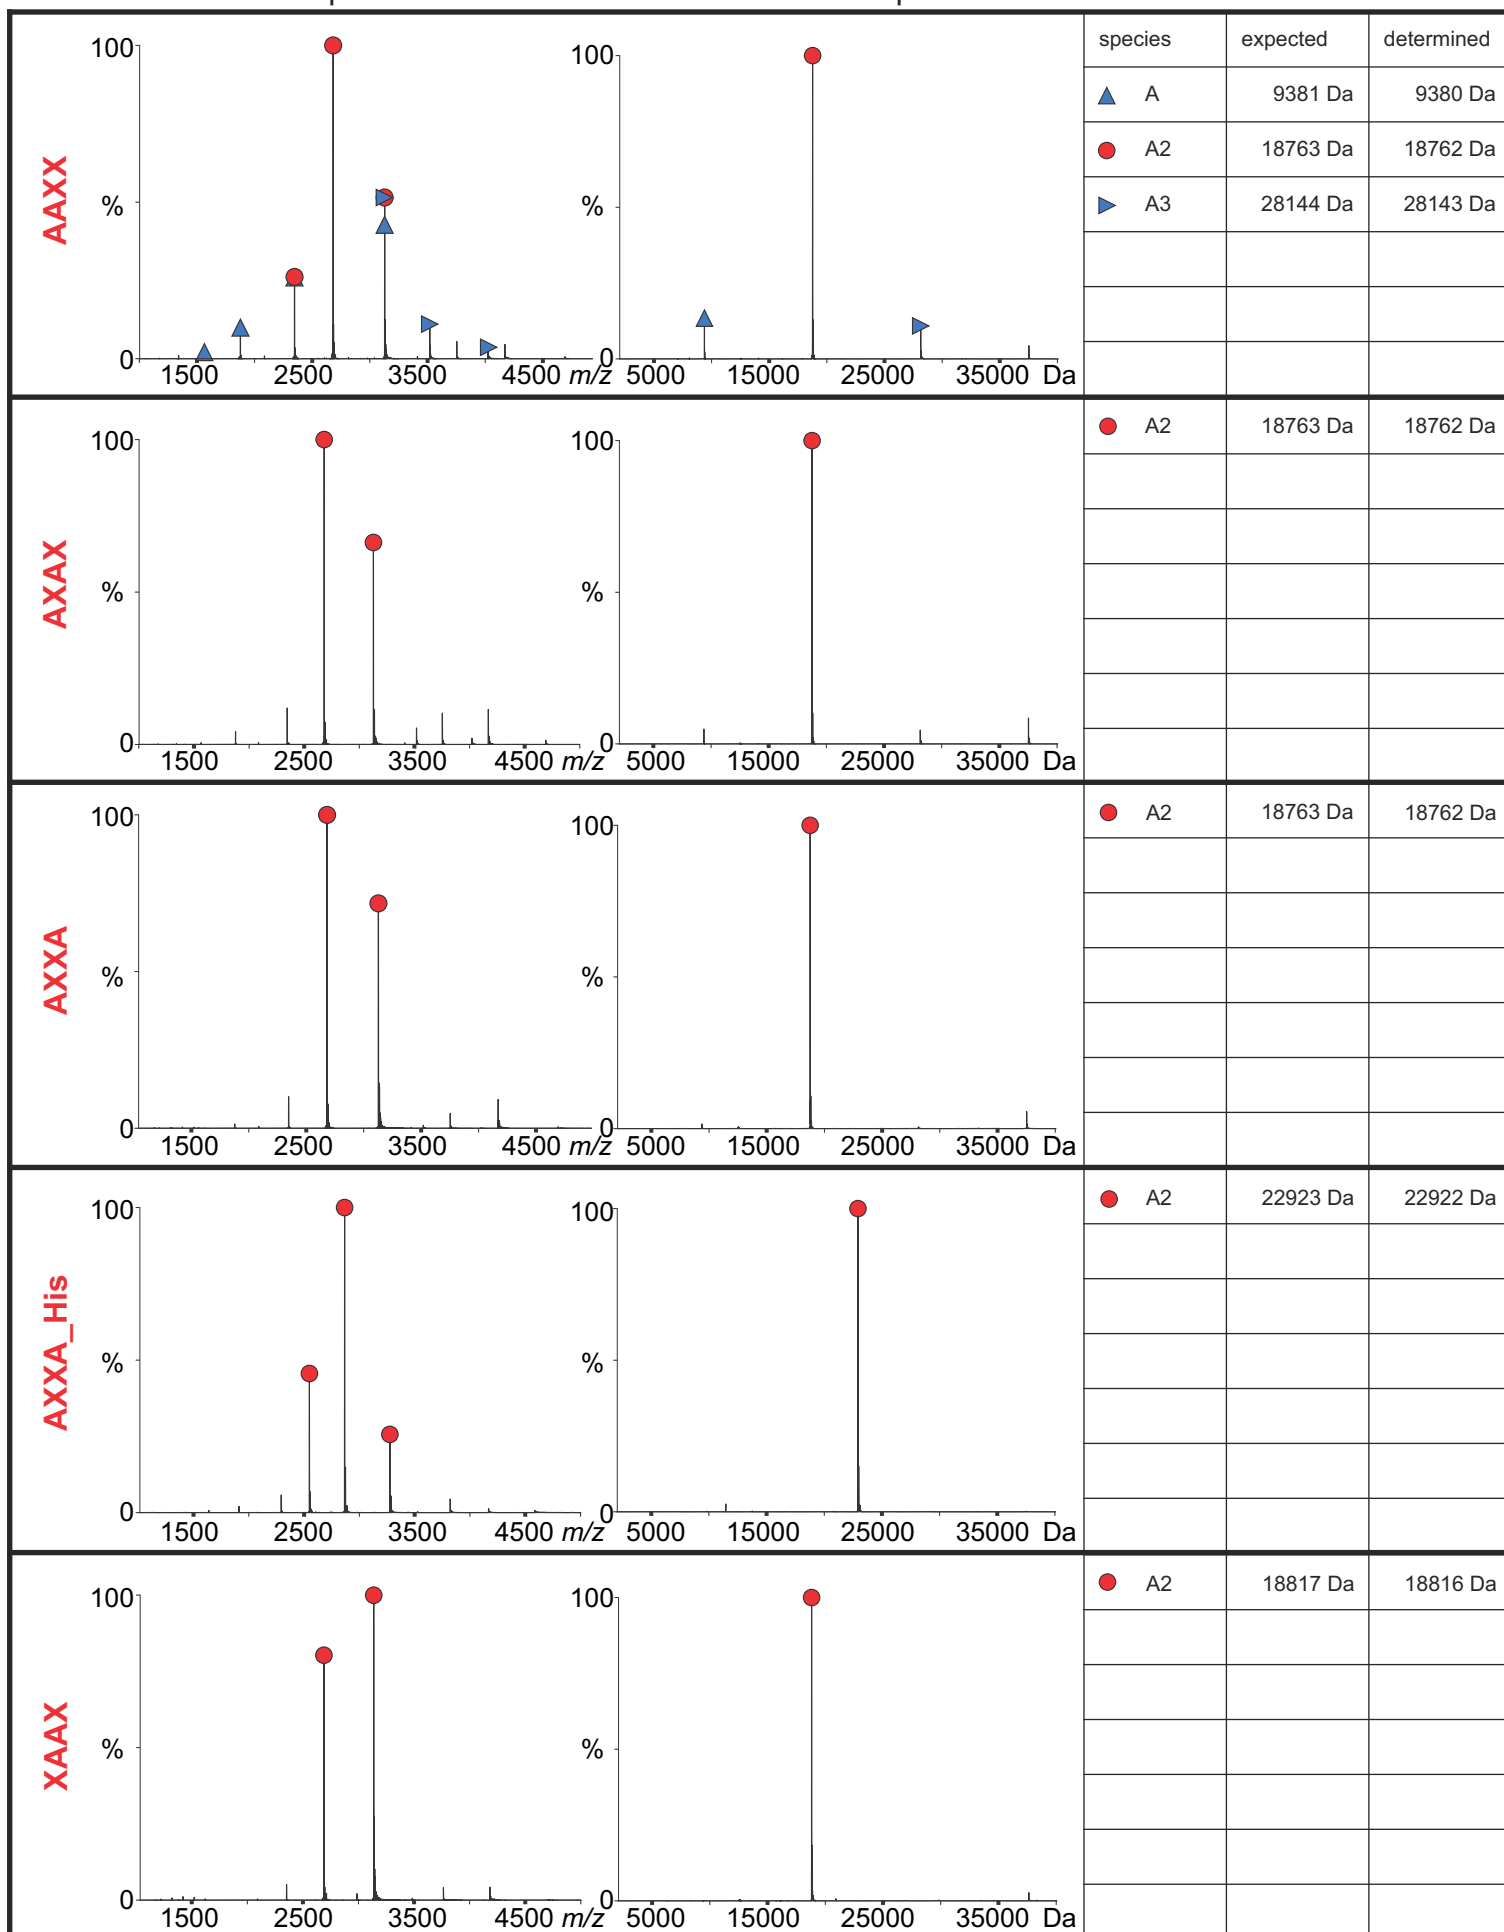

Mass spectrum

Deconvoluted spectrum

Annotated masses

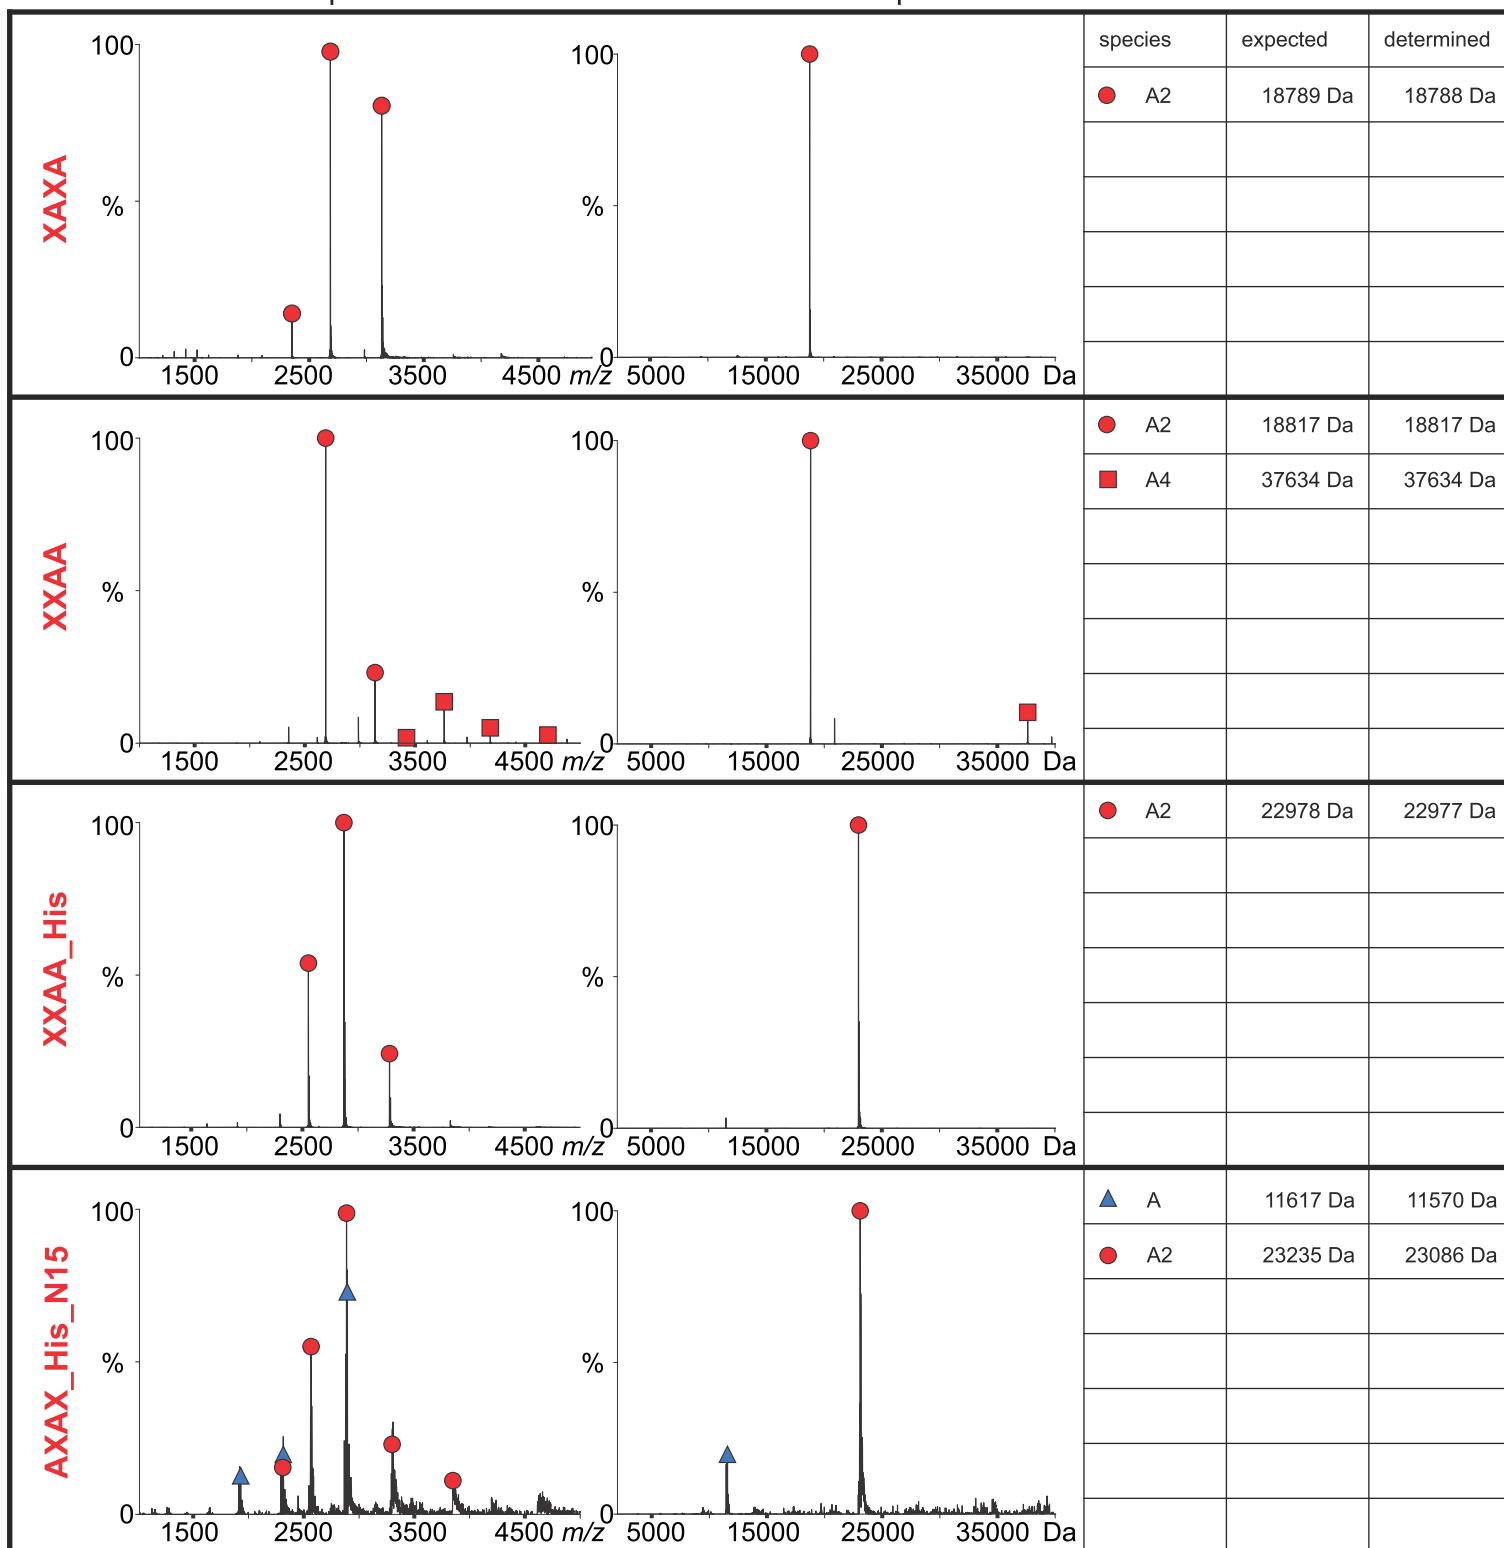

Supplement: NIHMS1025591-supplement-Sup_Table_10.pdf [file NIHMS1025591-supplement-Sup_Table_10.pdf]
