# Supplementary material
Source: PubMed Central journal article supplement (PMC6537907)
Supplement: NIHMS1025591-supplement-Sup_Table_12.pdf [file NIHMS1025591-supplement-Sup_Table_12.pdf]

Mass spectrum

Deconvoluted spectrum

Annotated masses

|                | Mass spectrum                                                                       | Deconvoluted spectrum                                                                | species | expected | determined |
|----------------|-------------------------------------------------------------------------------------|--------------------------------------------------------------------------------------|---------|----------|------------|
| DHD_SC_9-13-37 | 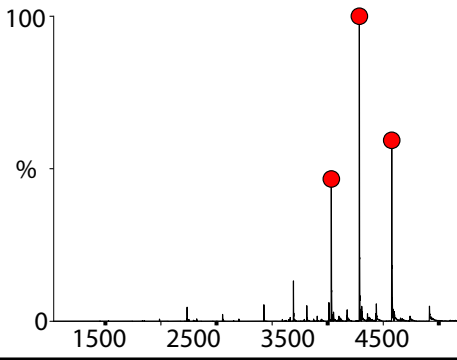   |    | ● ABCD  | 52979 Da | 52979 Da   |
| DHD_9-13       |    |    | ● ABC   | 34746 Da | 34746 Da   |
| DHD_15-37      |   |   | ● ABC   | 37163 Da | 37164 Da   |
| DHD_13-37      |  |  | ● ABC   | 37133 Da | 37132 Da   |
