# Supplementary material
Source: PubMed Central journal article supplement (PMC6537907)

Mass spectrum

Annotated masses

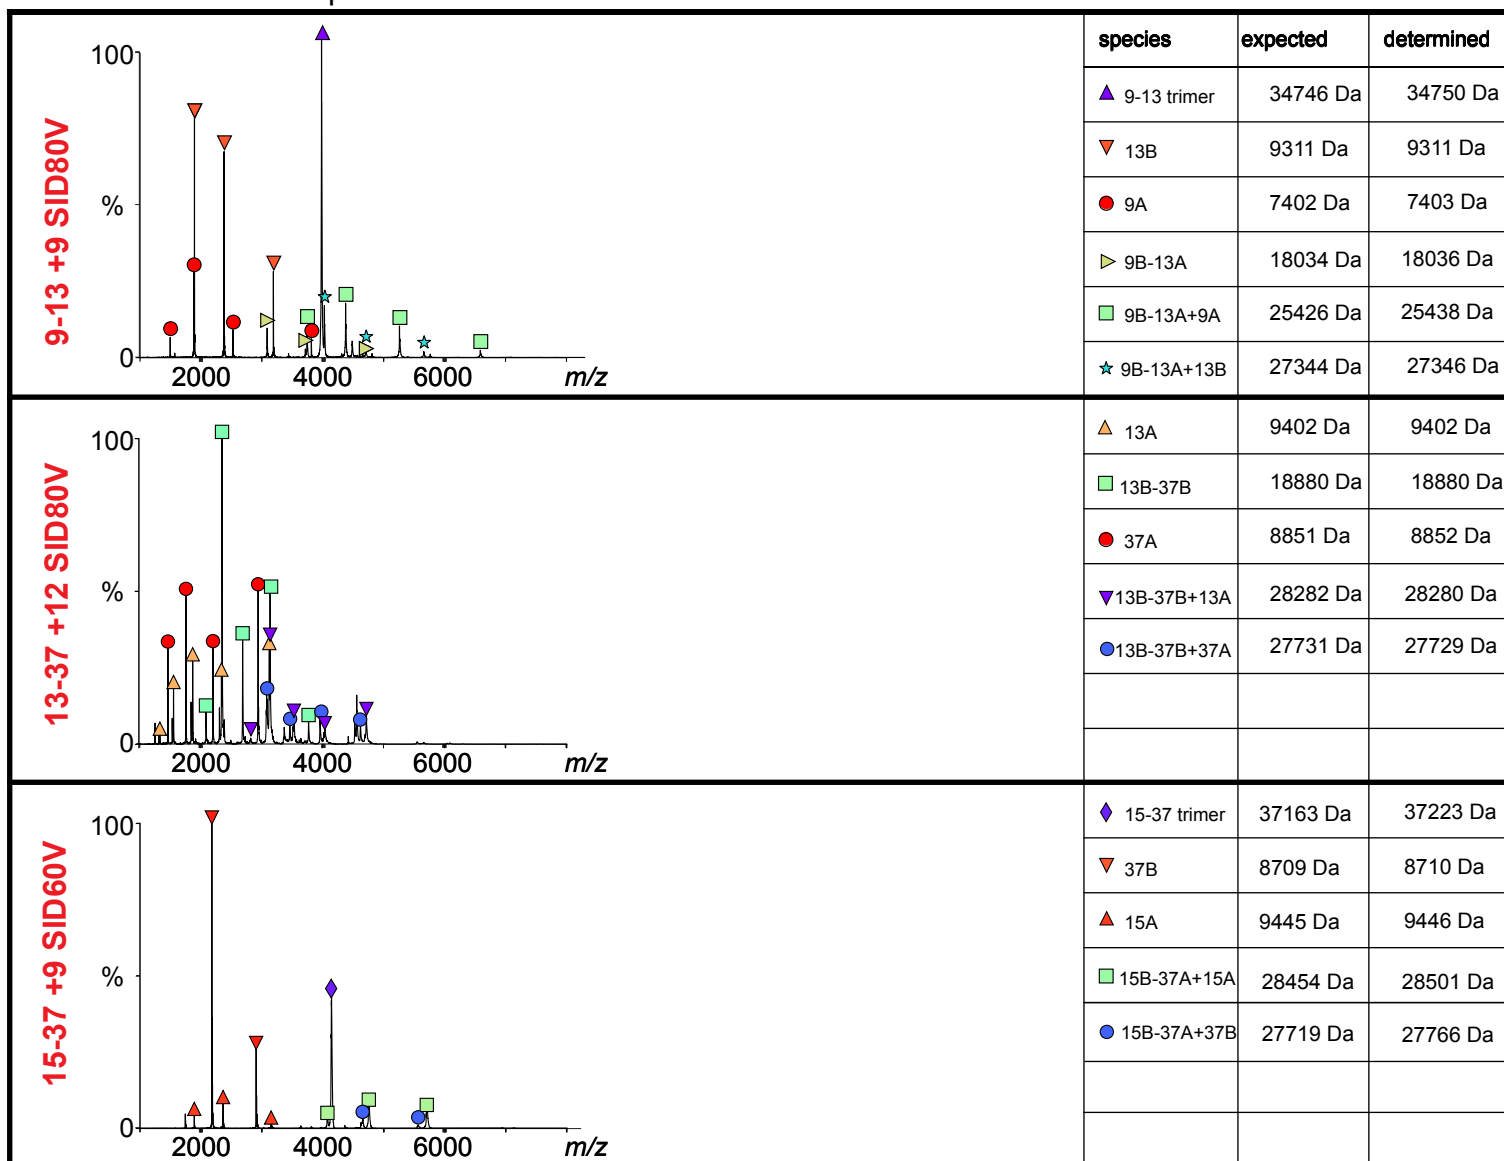

Supplement: NIHMS1025591-supplement-Sup_Table_13.pdf [file NIHMS1025591-supplement-Sup_Table_13.pdf]

a

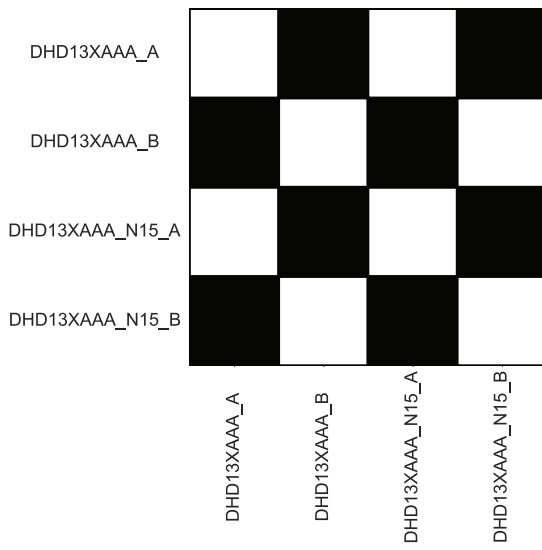

b

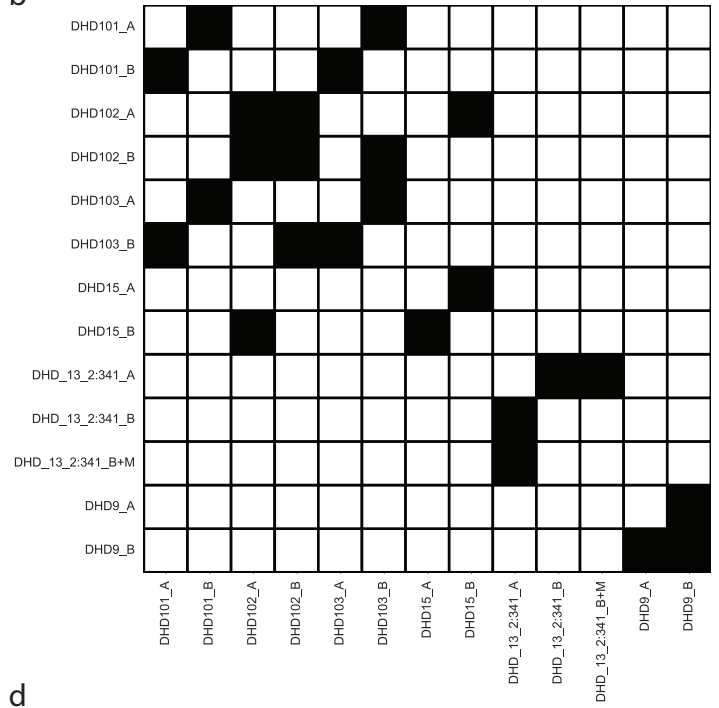

c

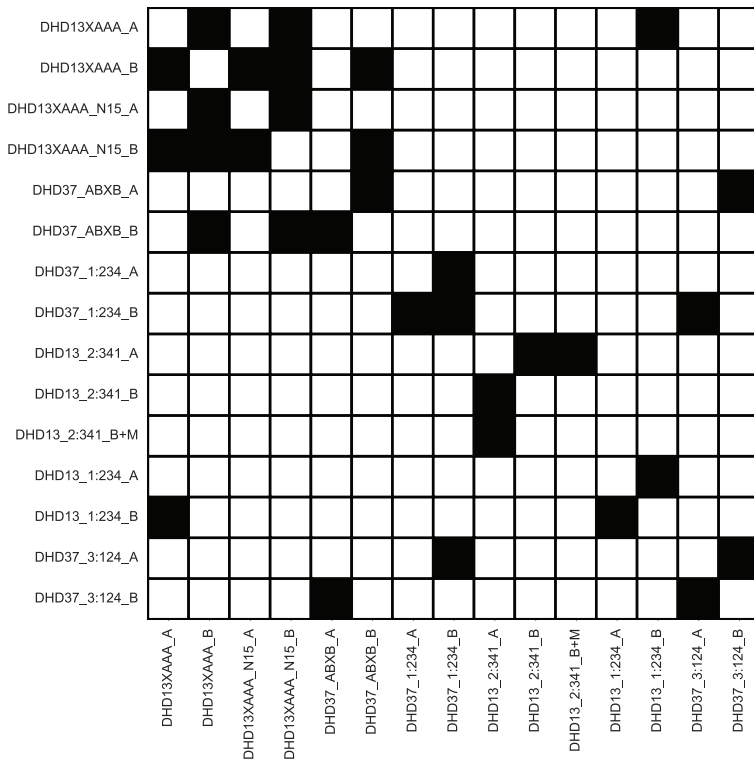

d

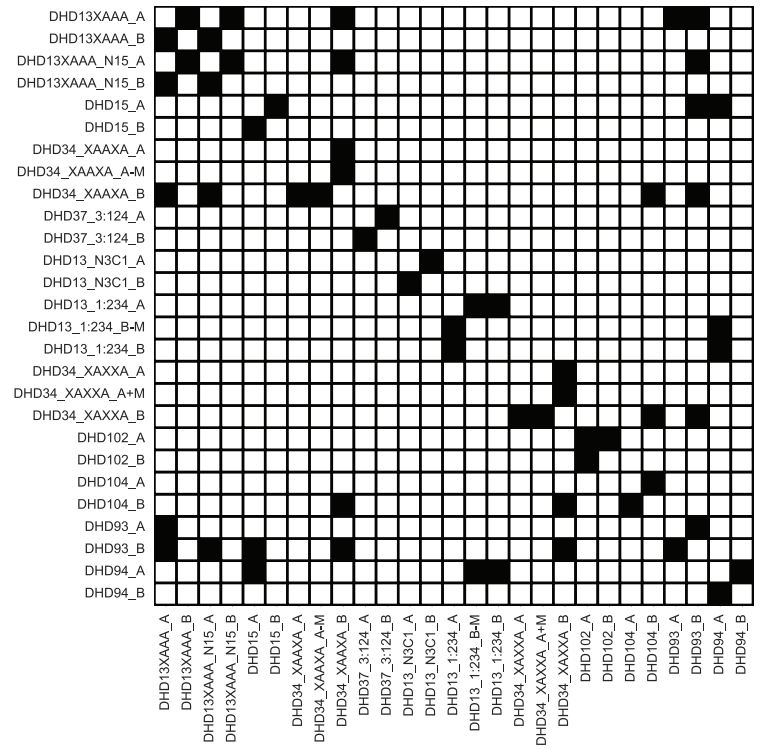

**e**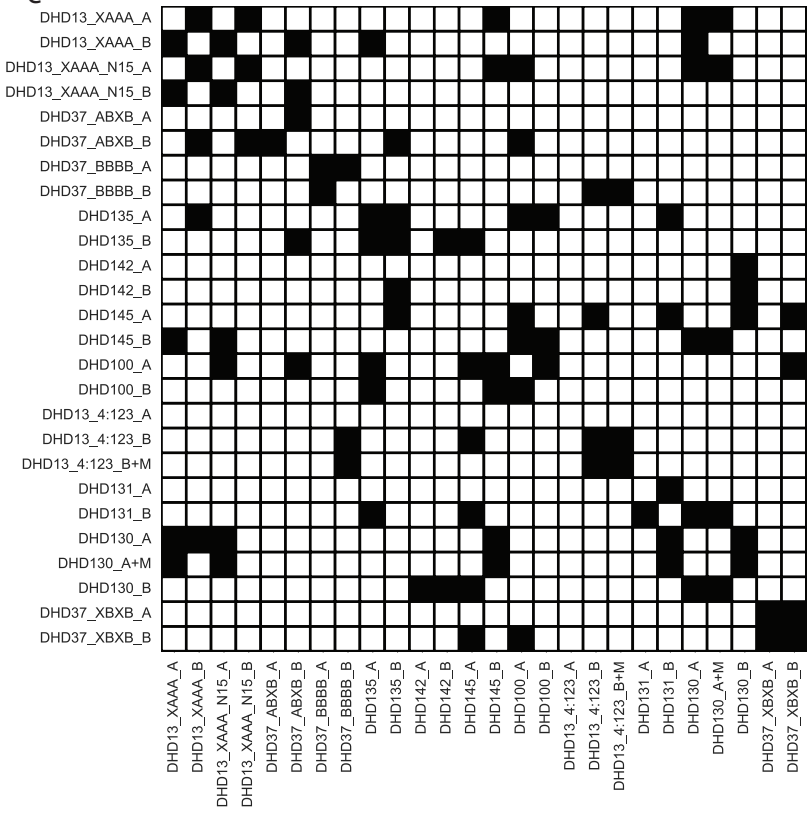**f**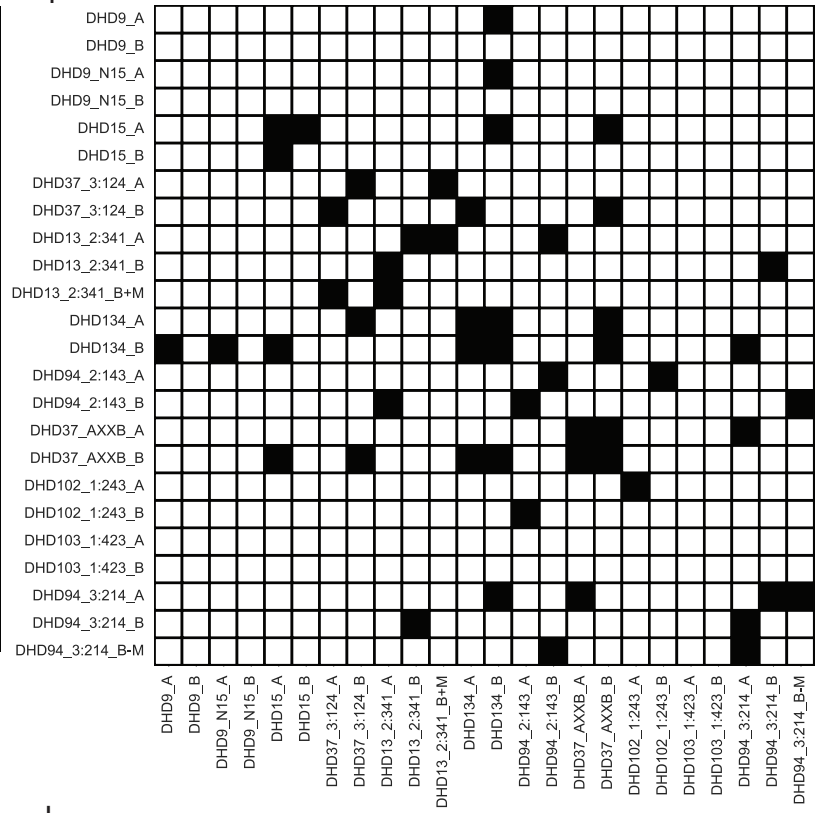**g**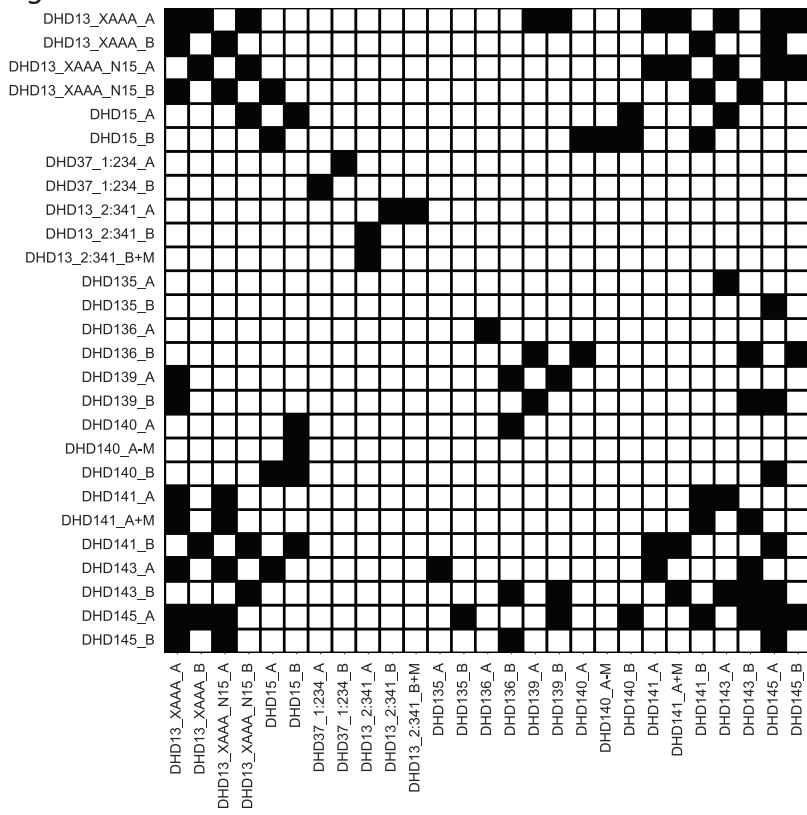**h**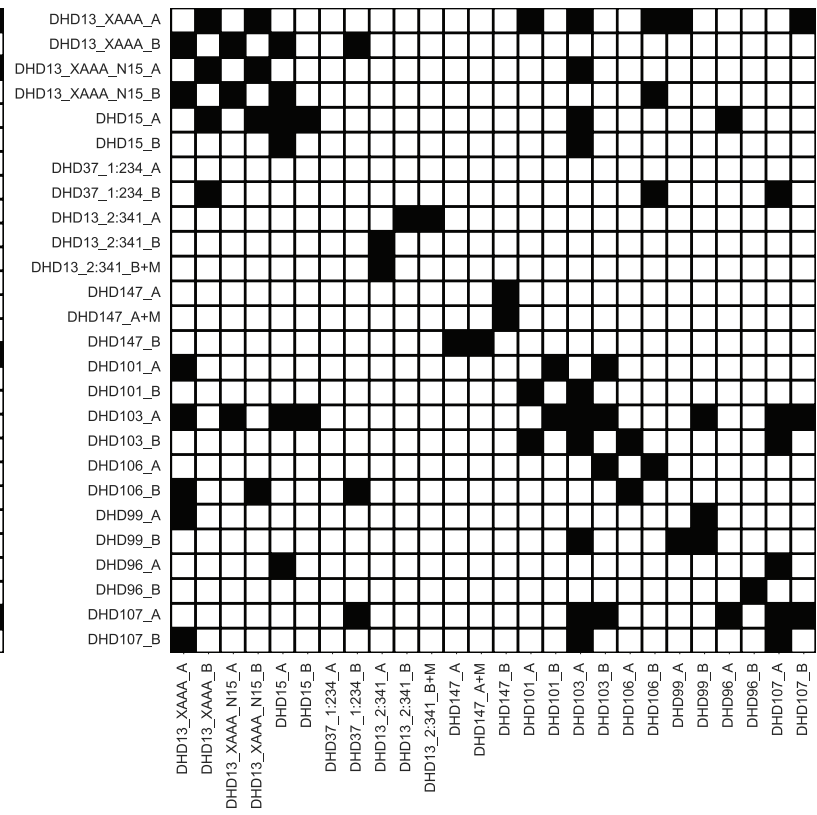

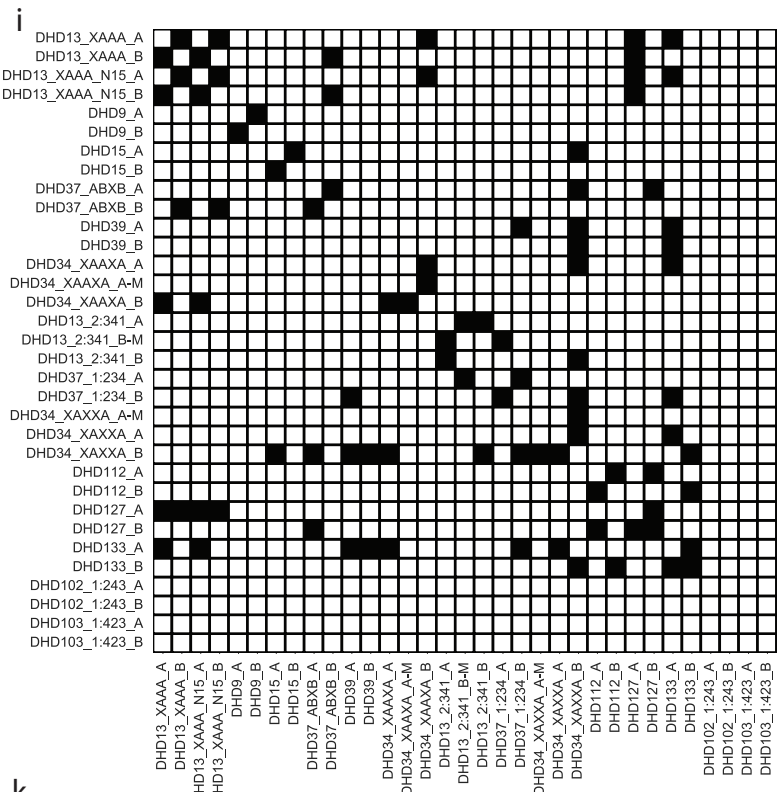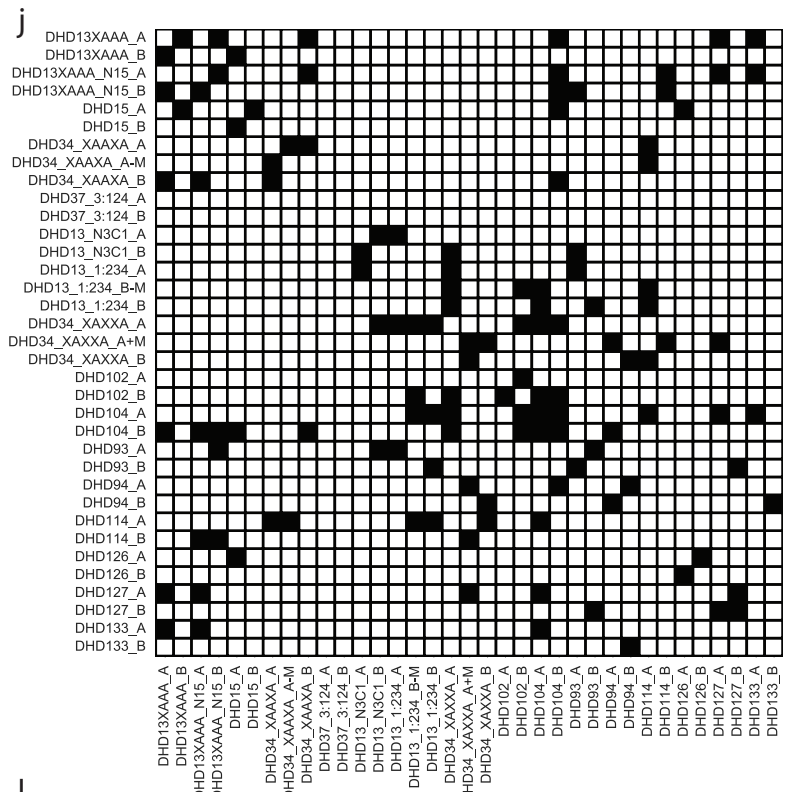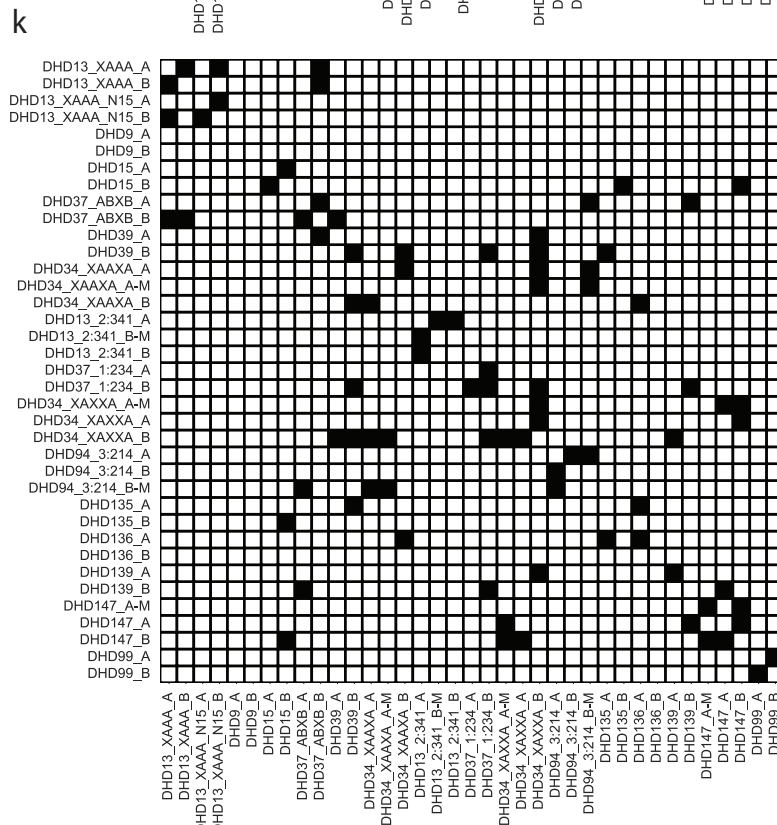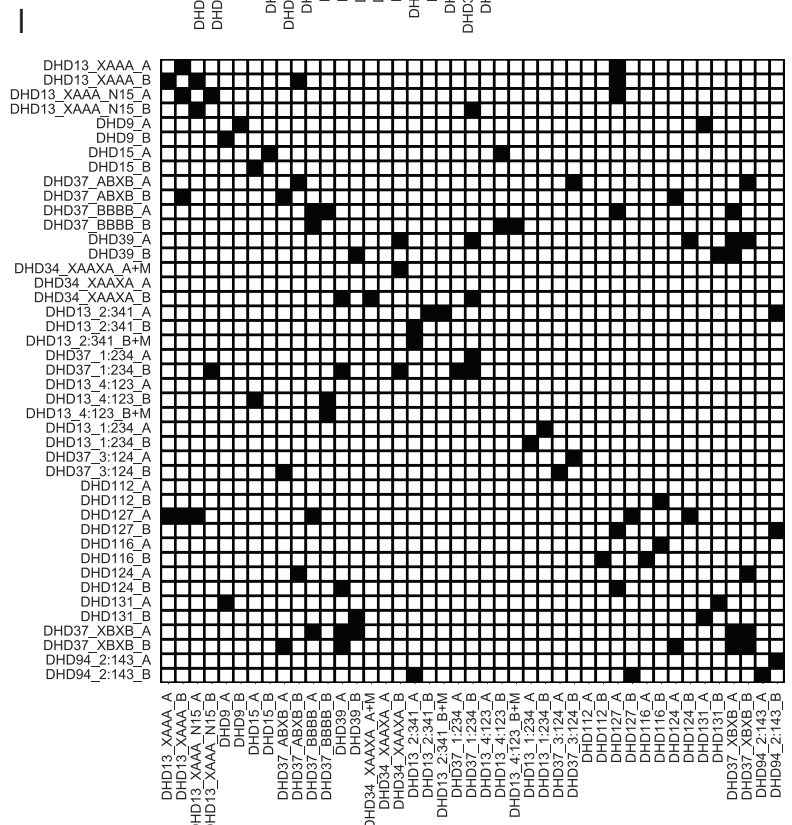

Supplement: NIHMS1025591-supplement-Sup_Table_14.pdf [file NIHMS1025591-supplement-Sup_Table_14.pdf]

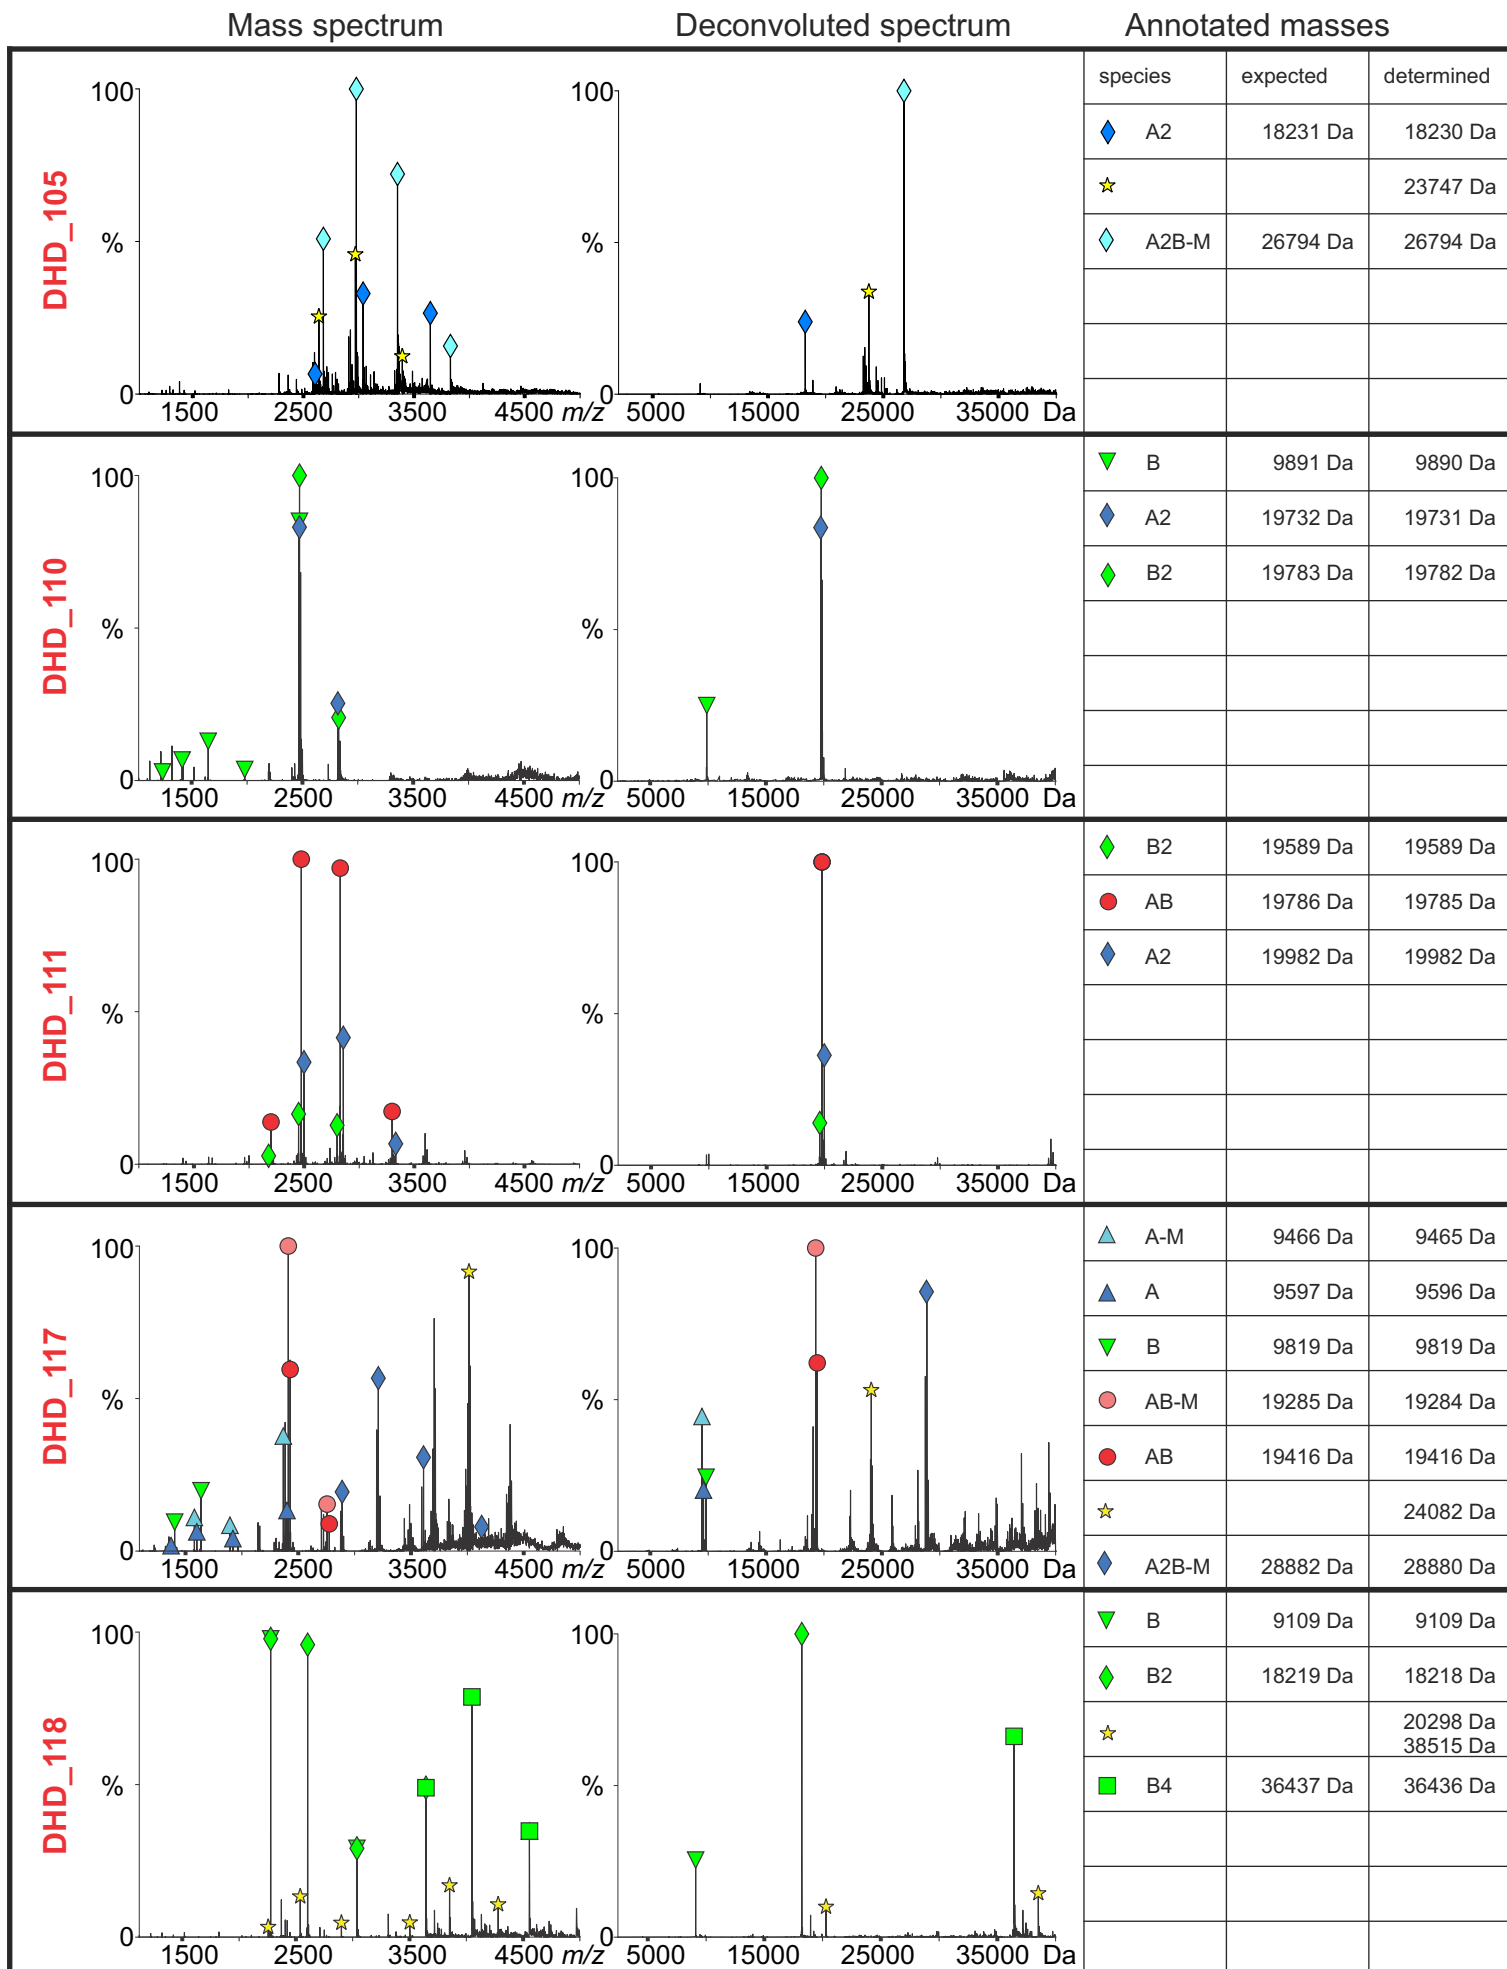

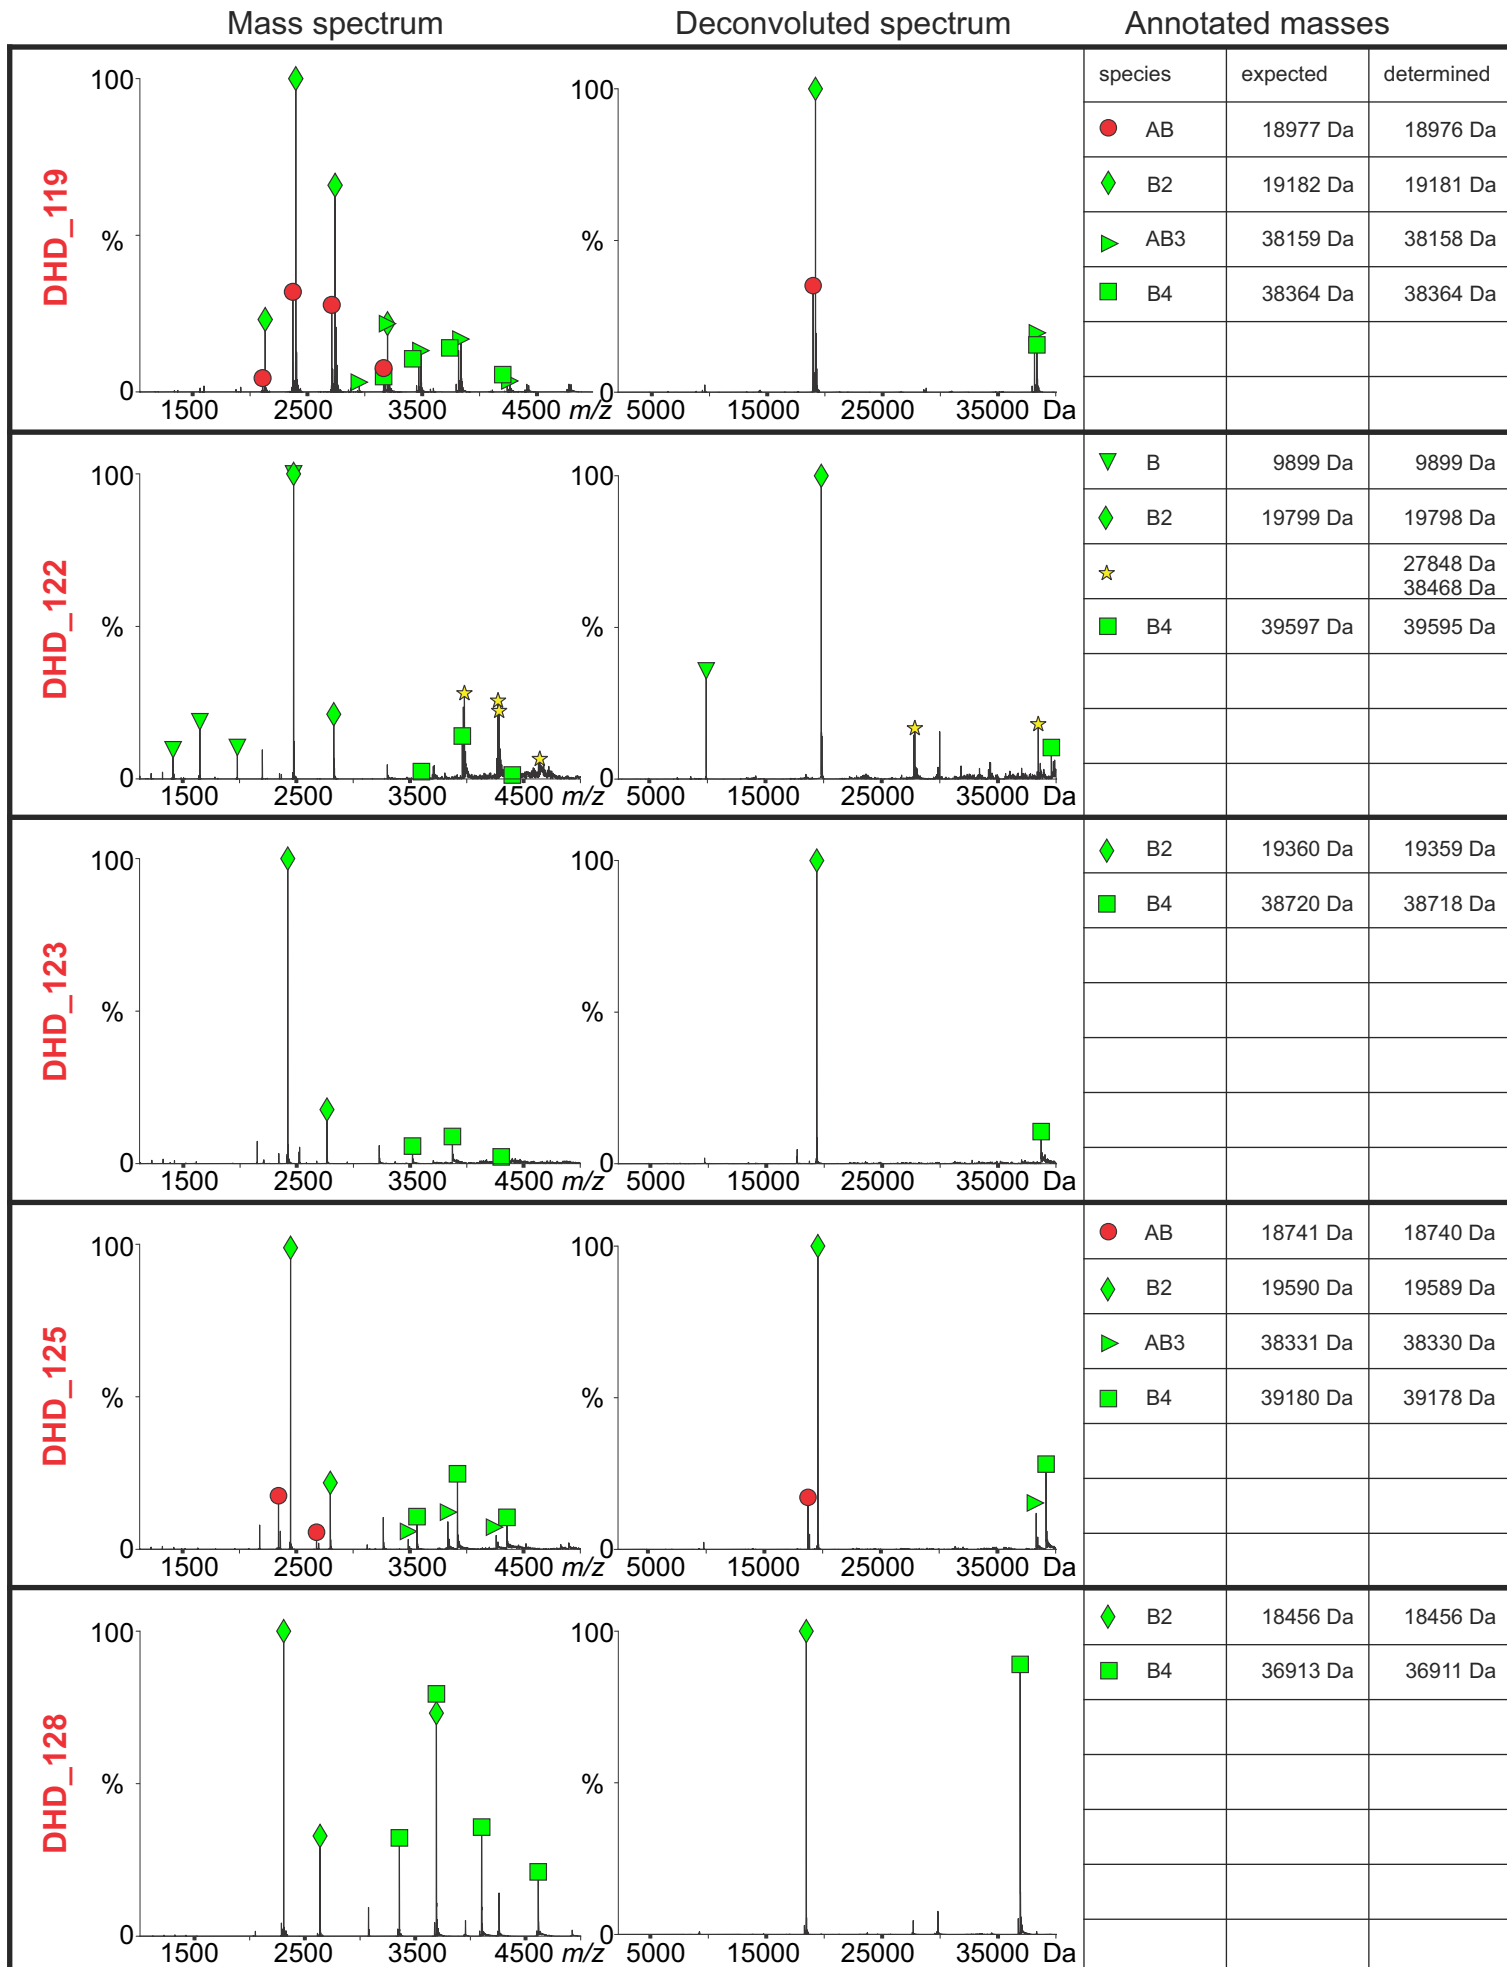

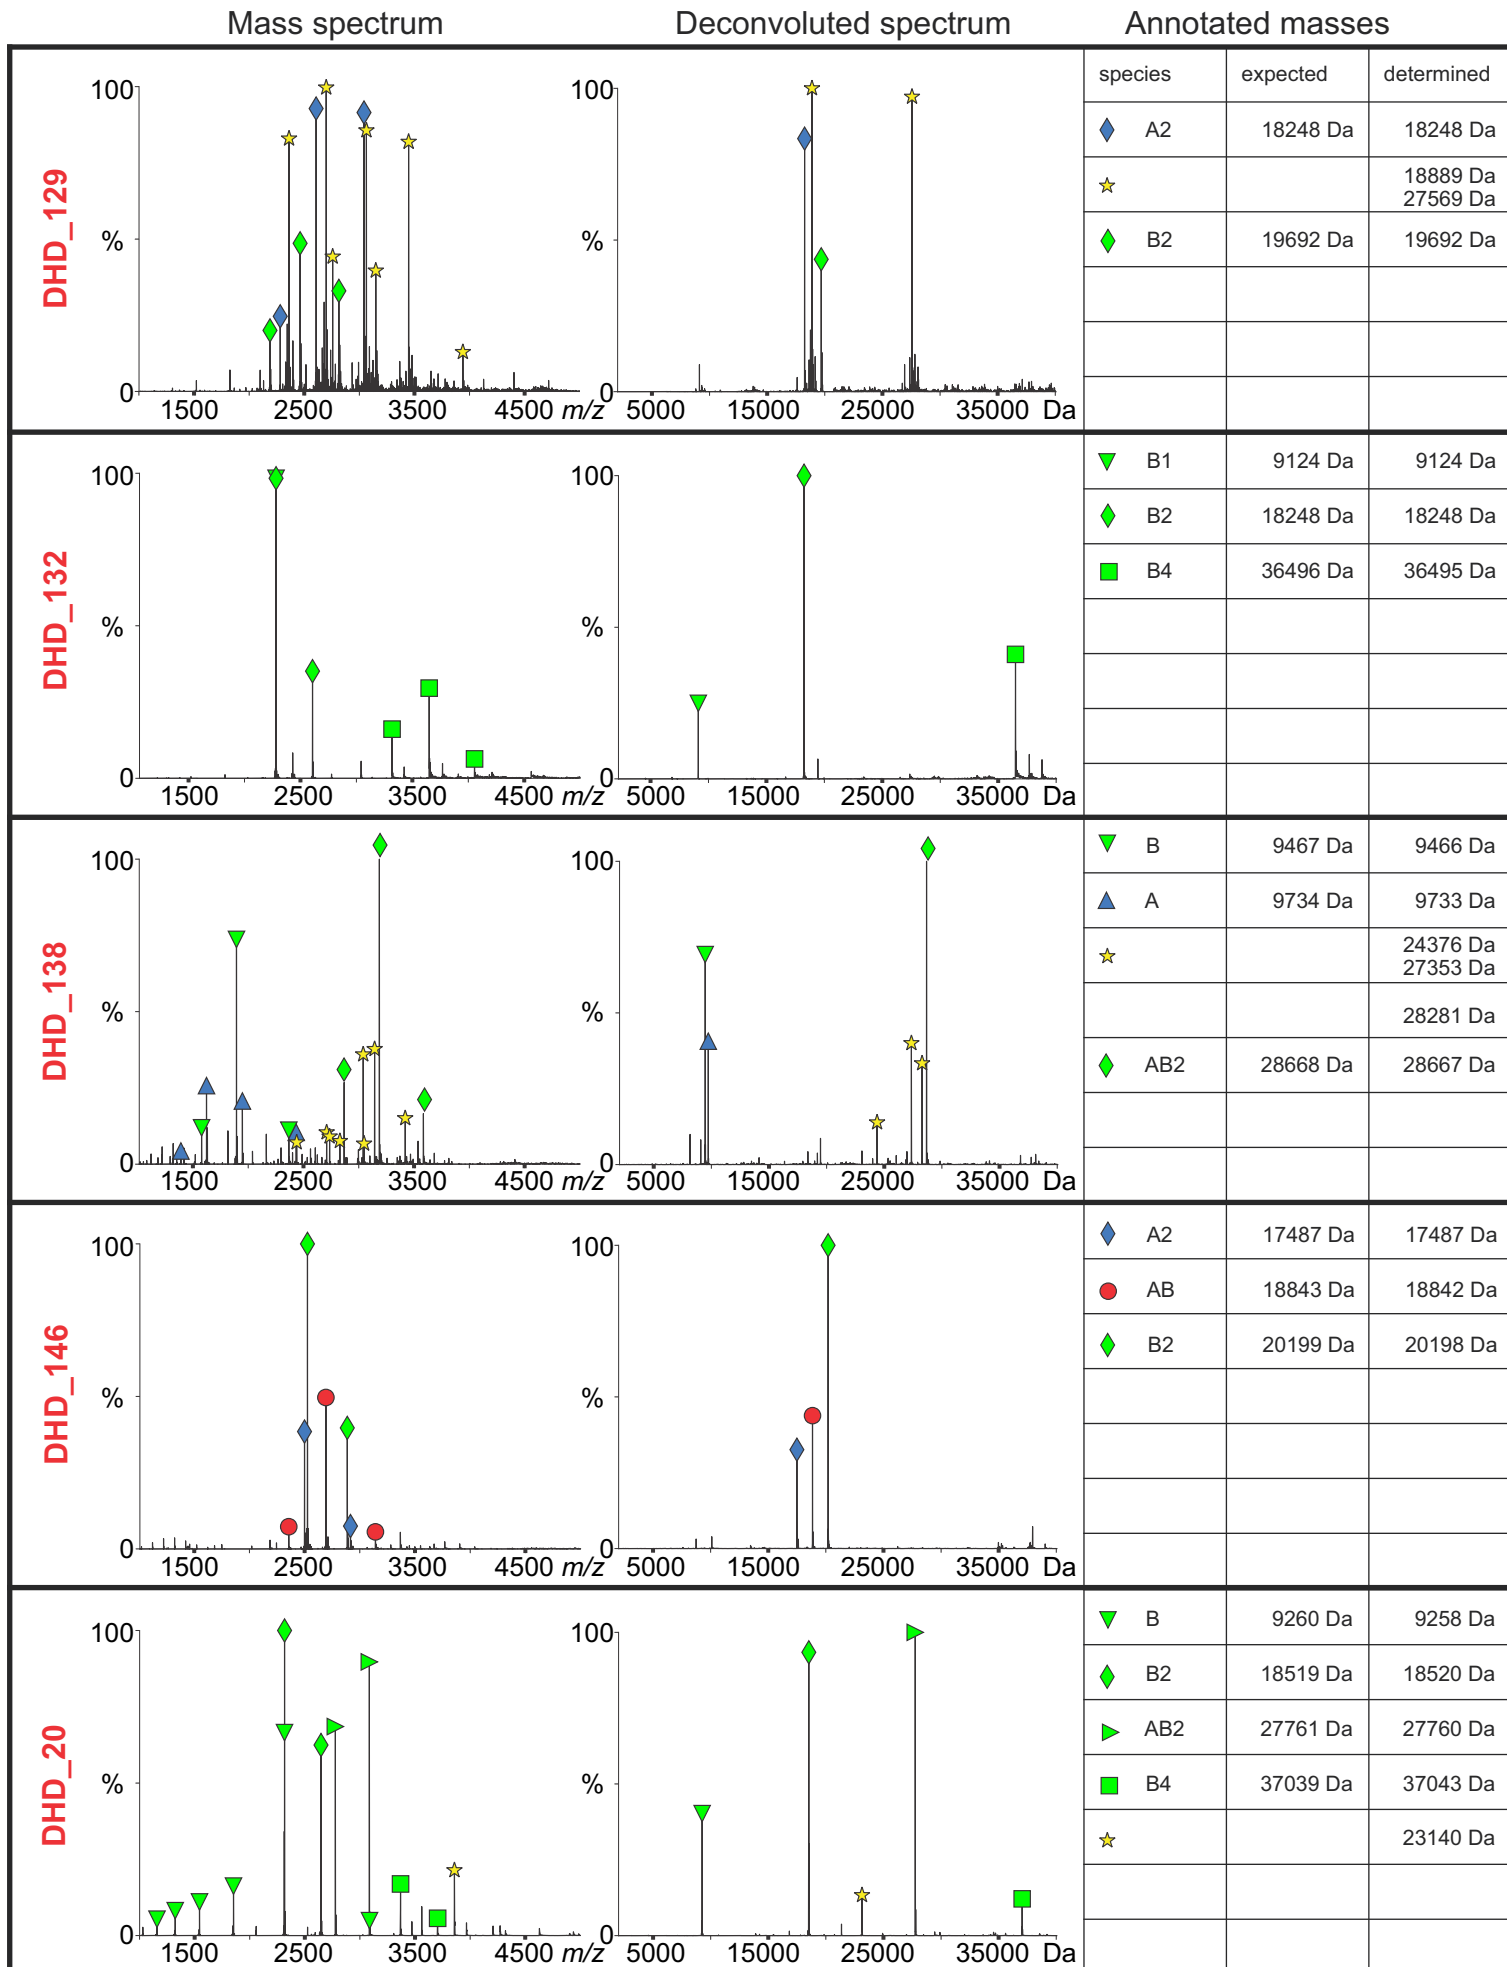

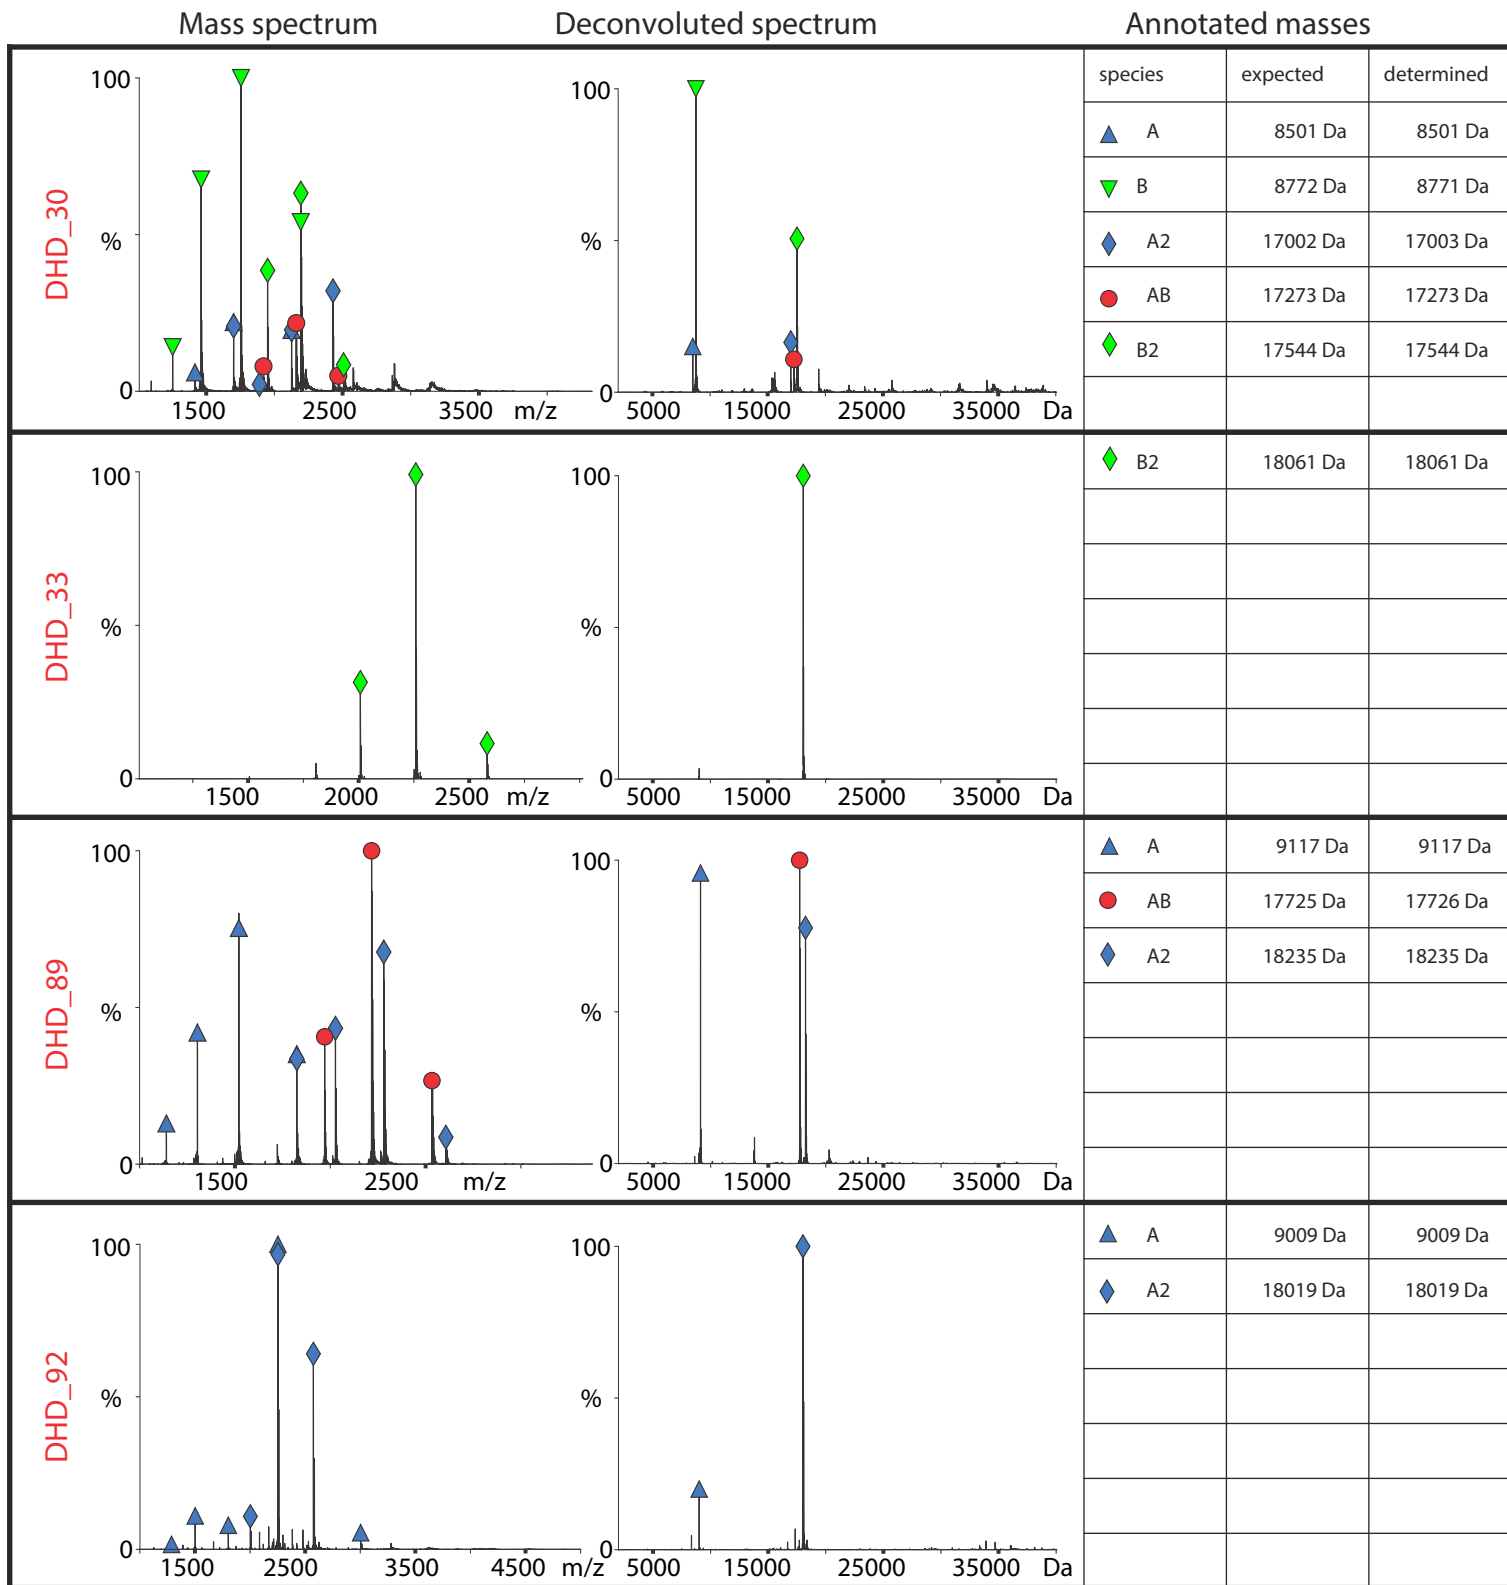

Supplement: NIHMS1025591-supplement-Sup_Table_5.pdf [file NIHMS1025591-supplement-Sup_Table_5.pdf]

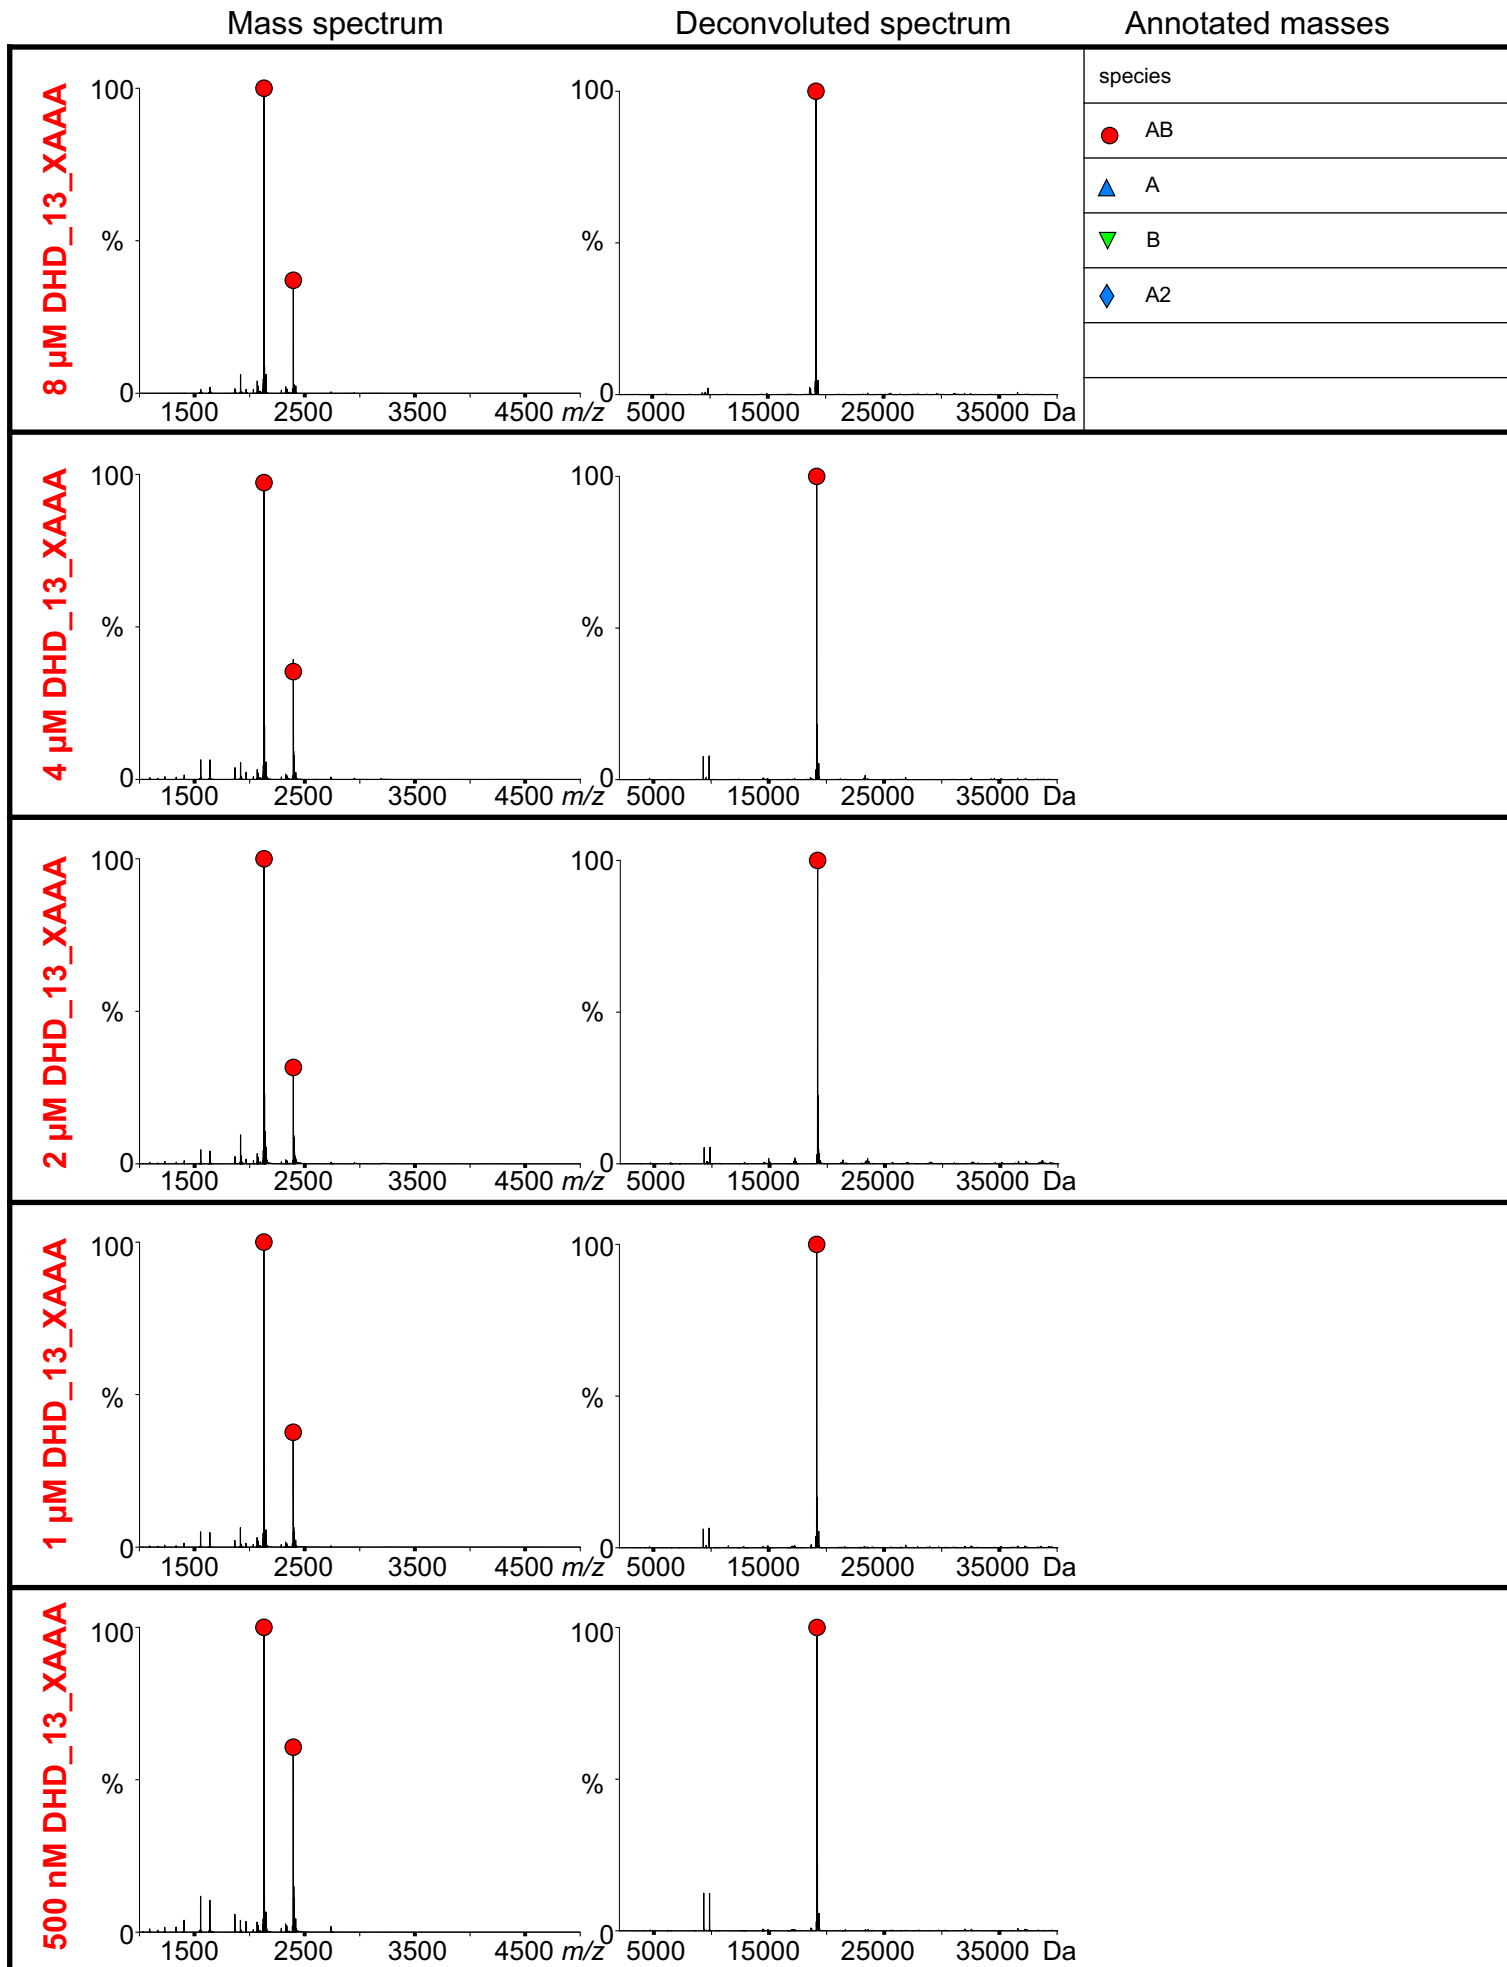

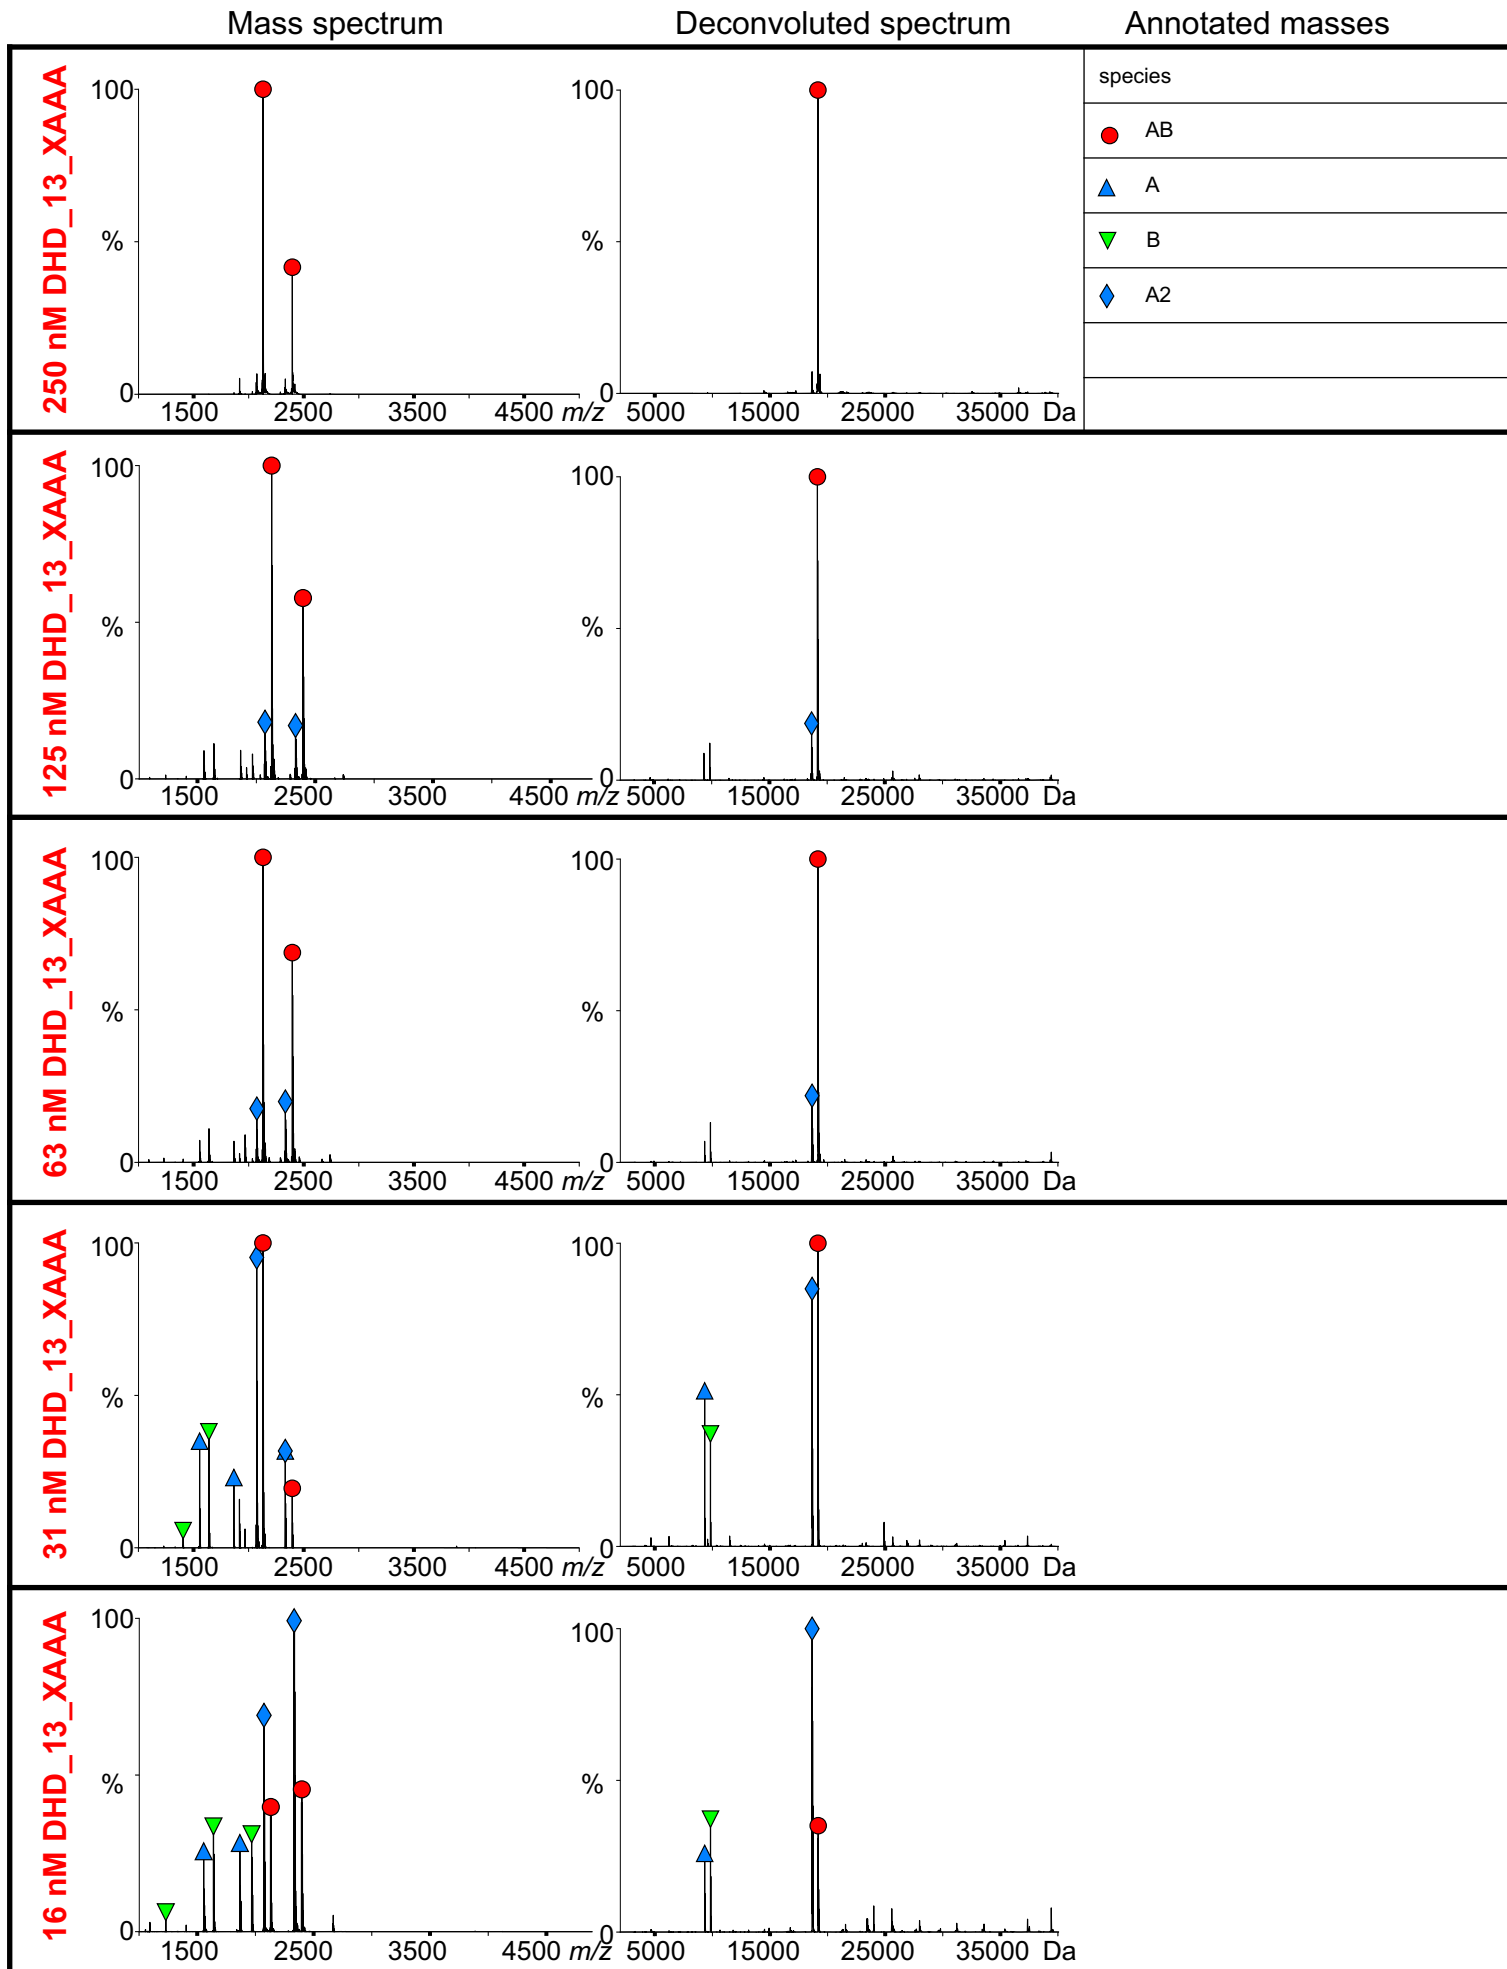

Mass spectrum

Deconvoluted spectrum

Annotated masses

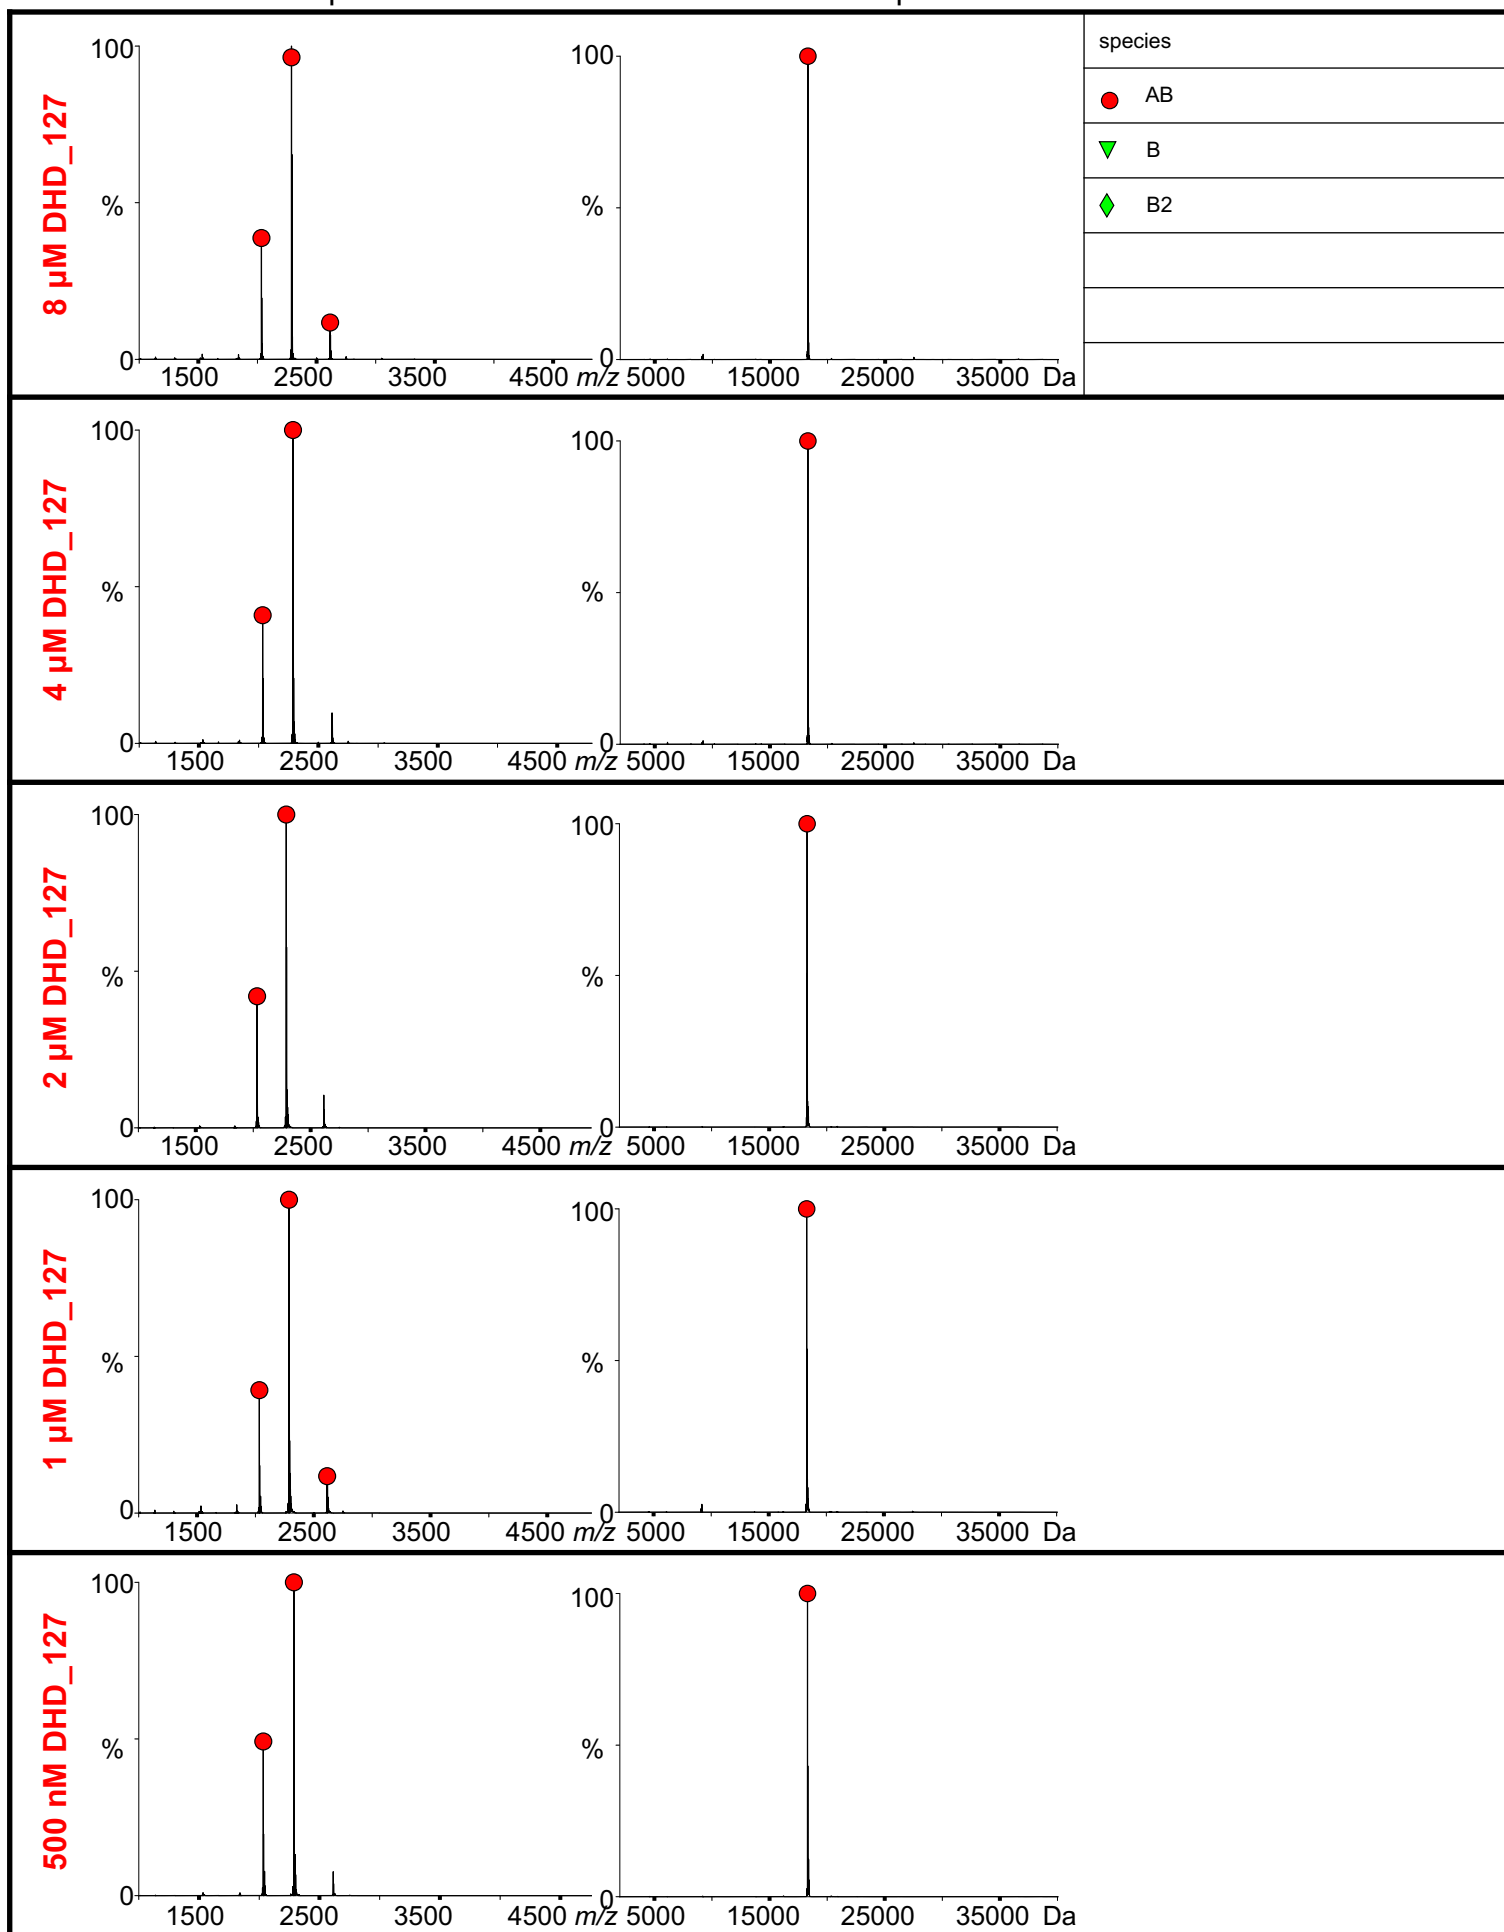

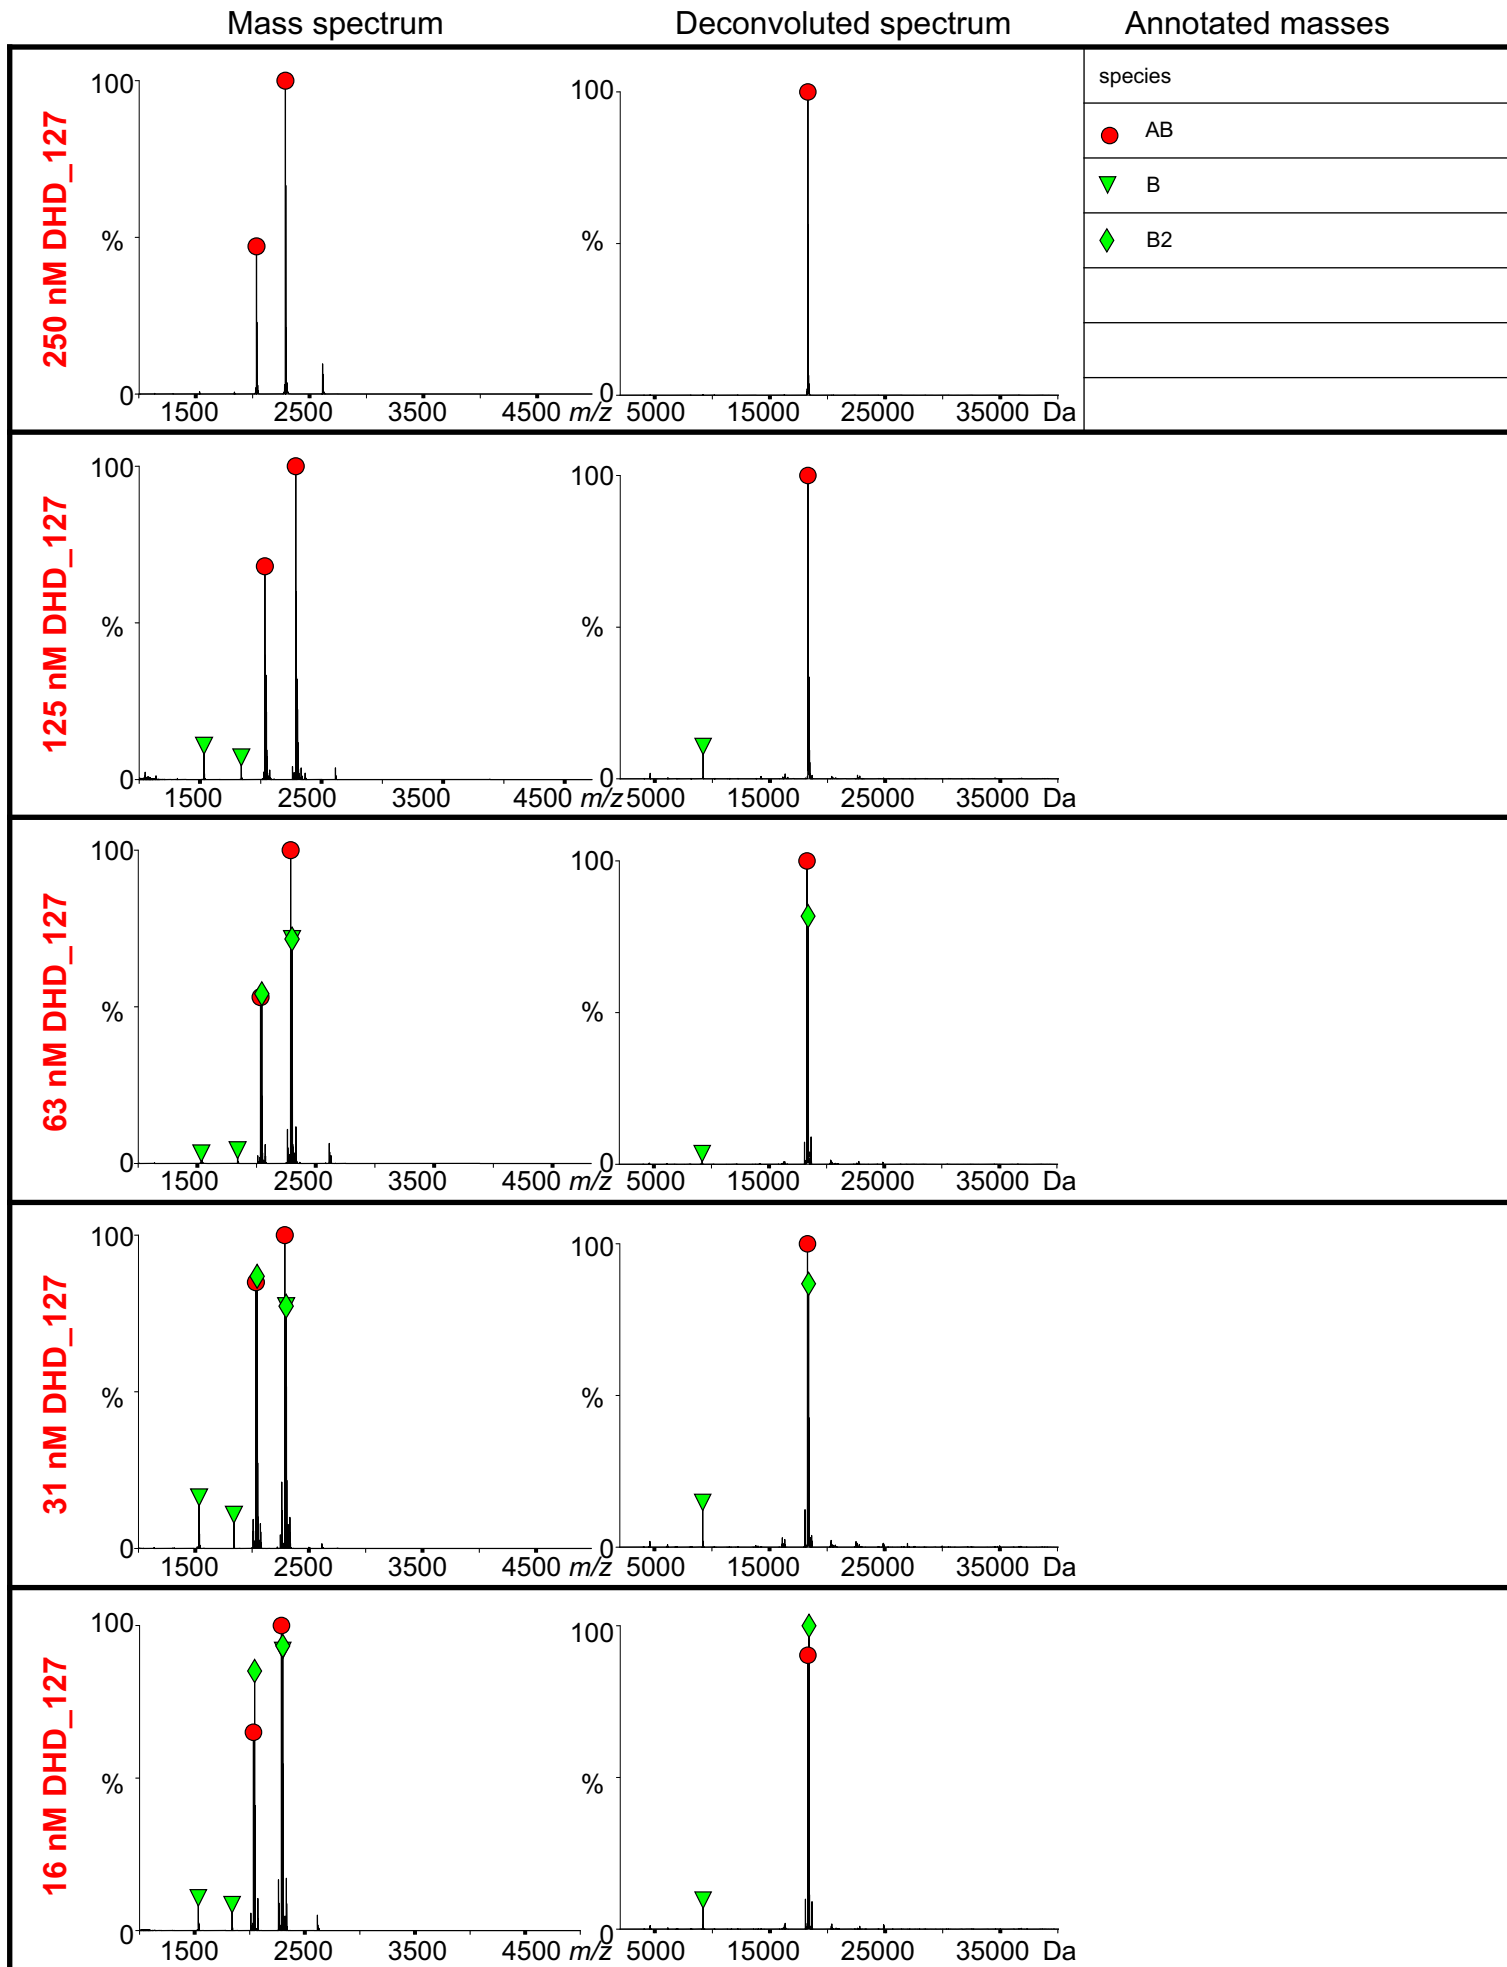

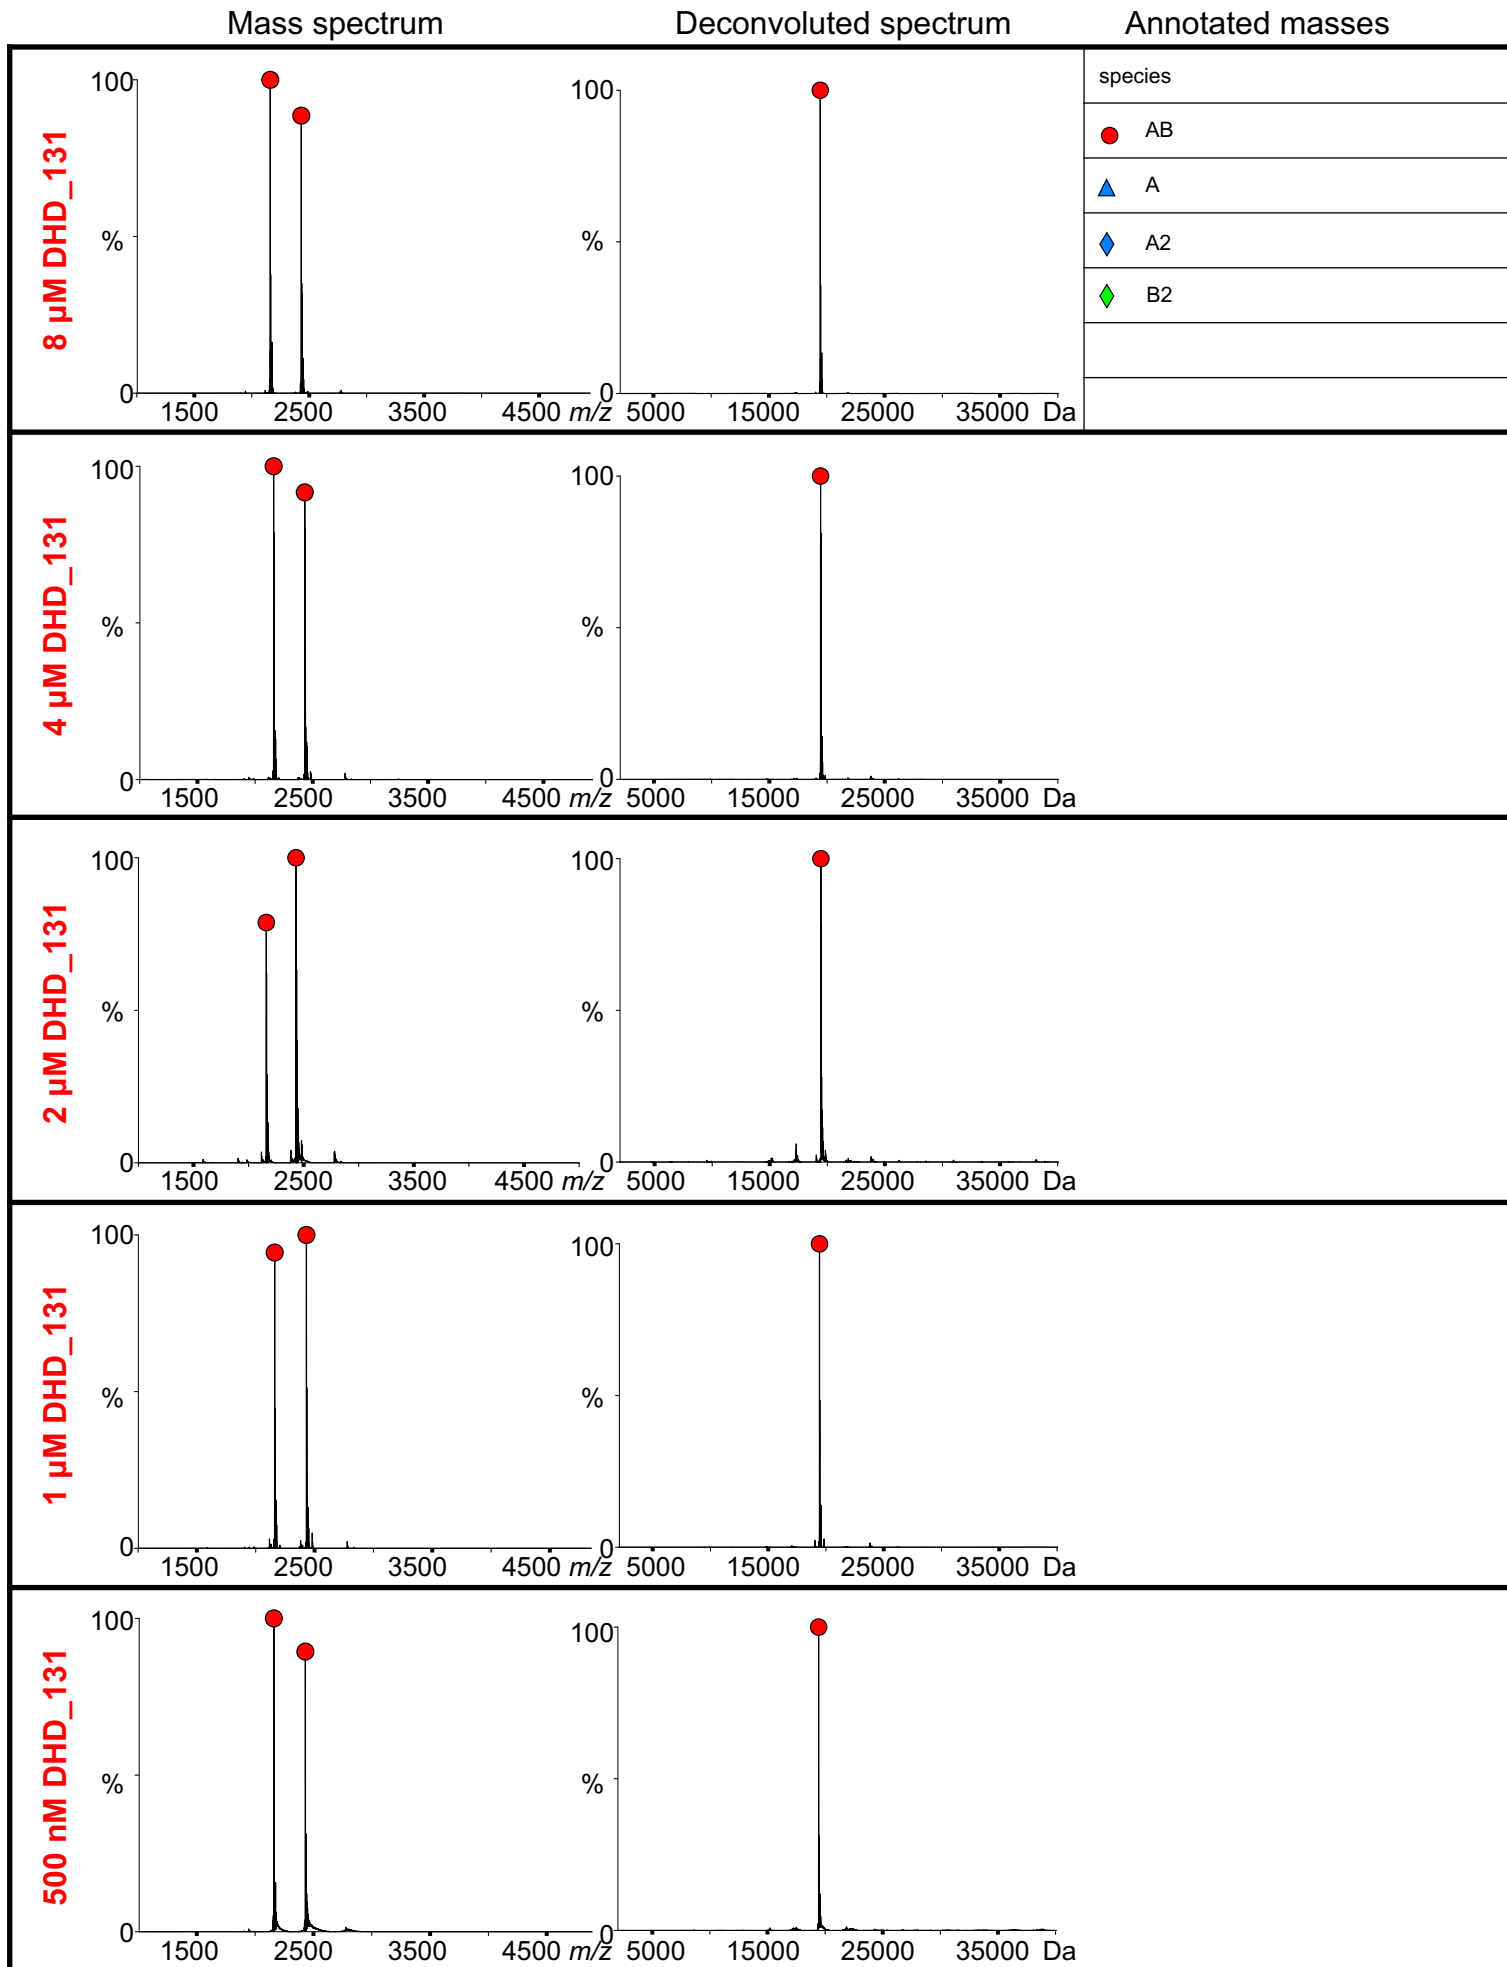

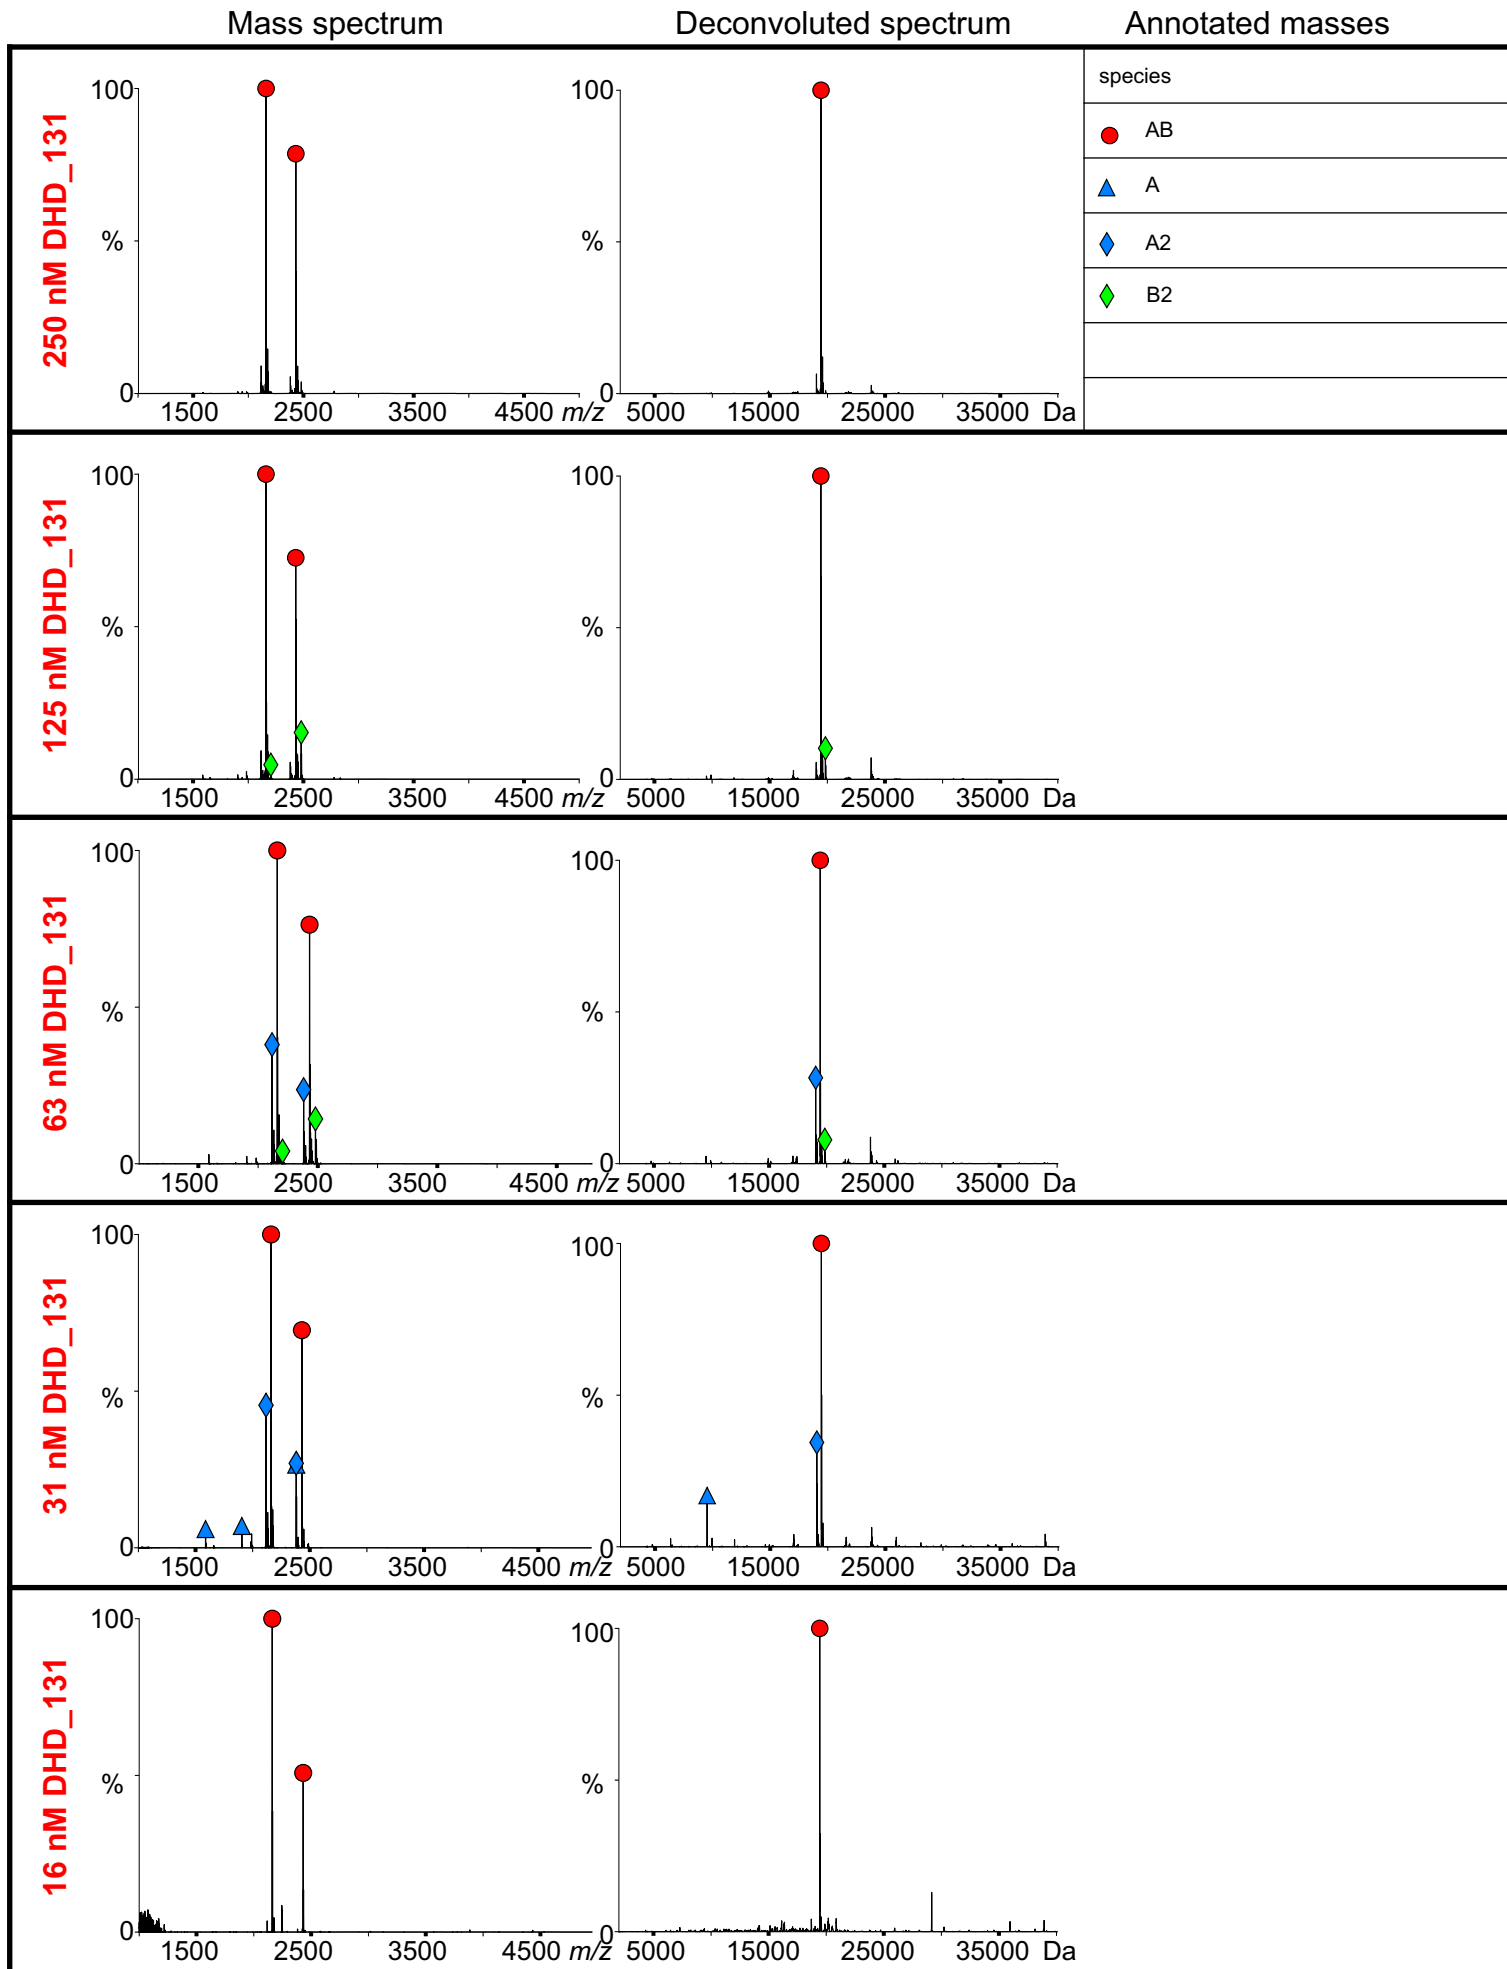

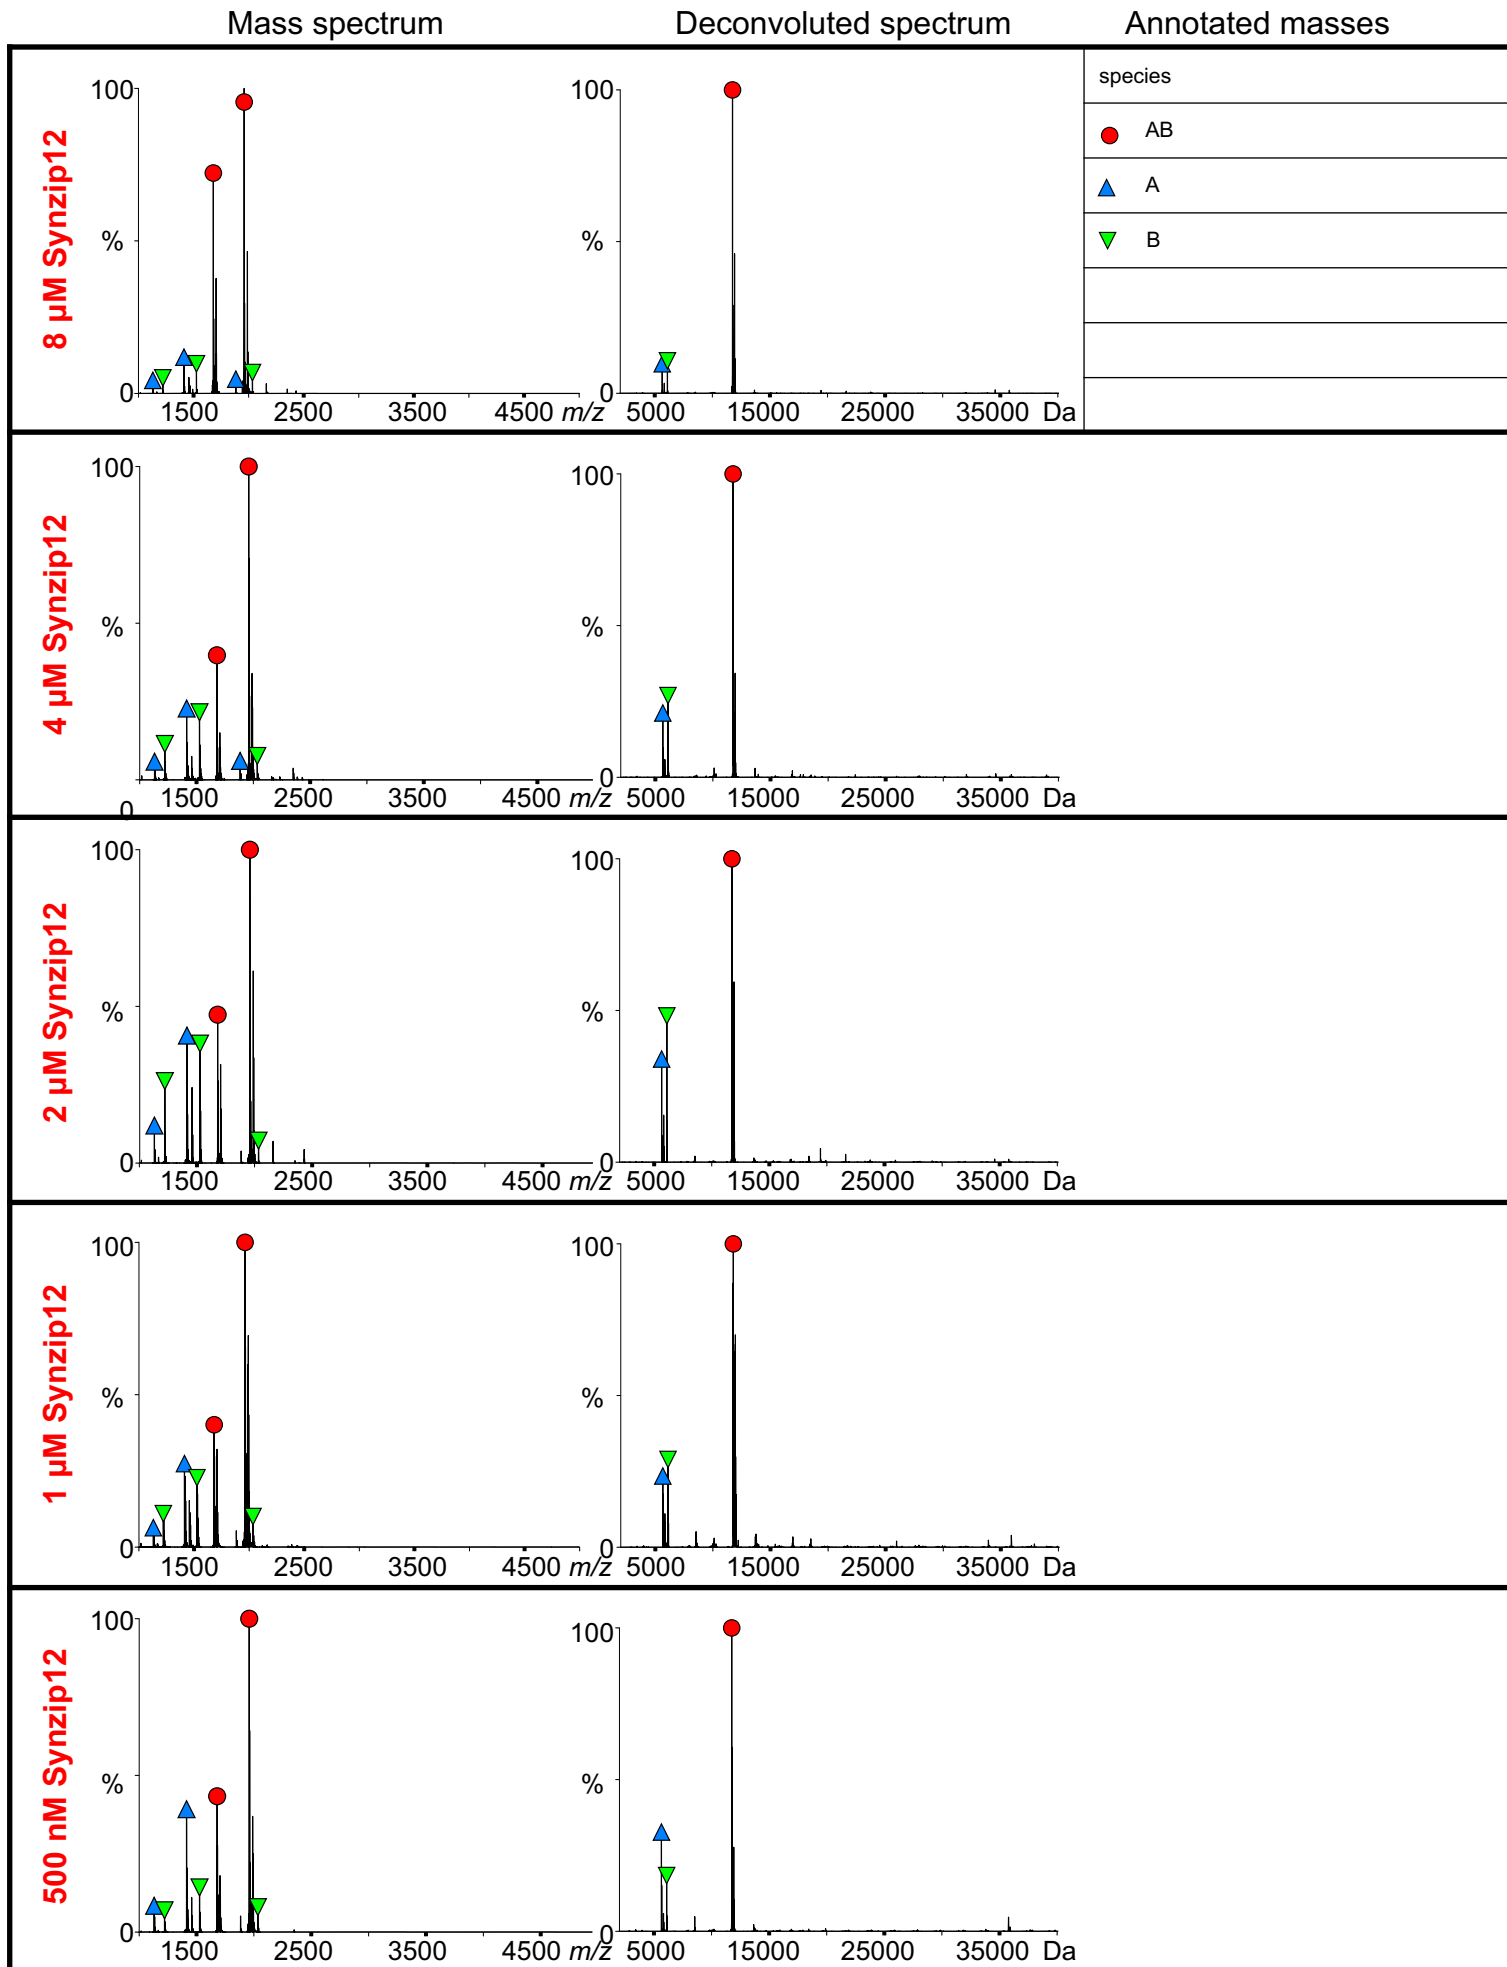

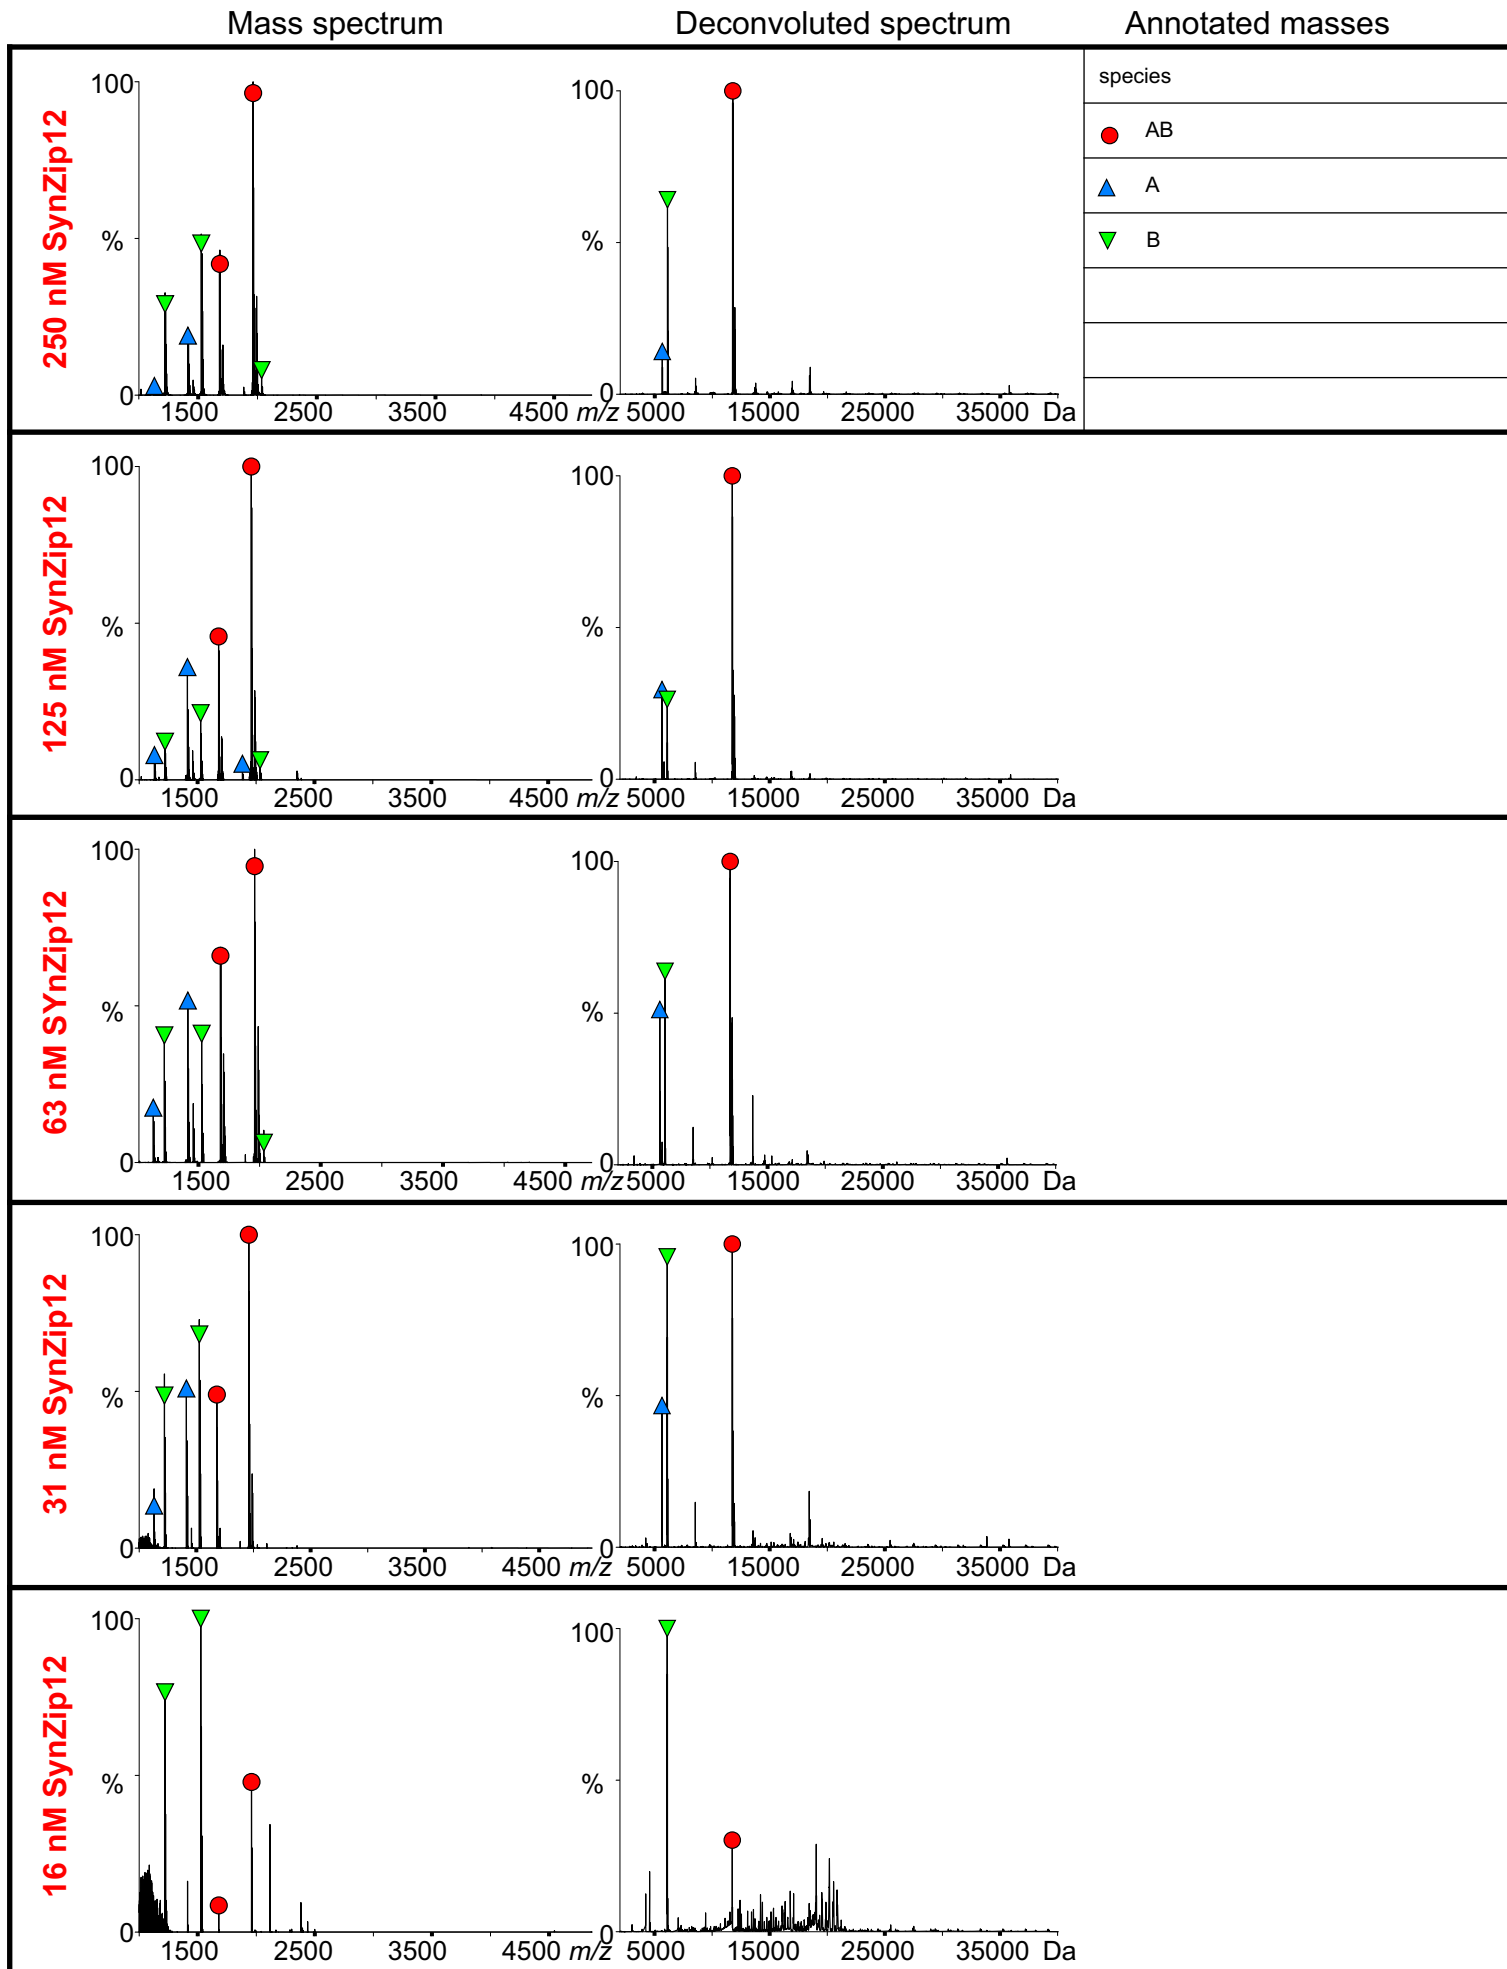

Supplement: NIHMS1025591-supplement-Sup_Table_7.pdf [file NIHMS1025591-supplement-Sup_Table_7.pdf]

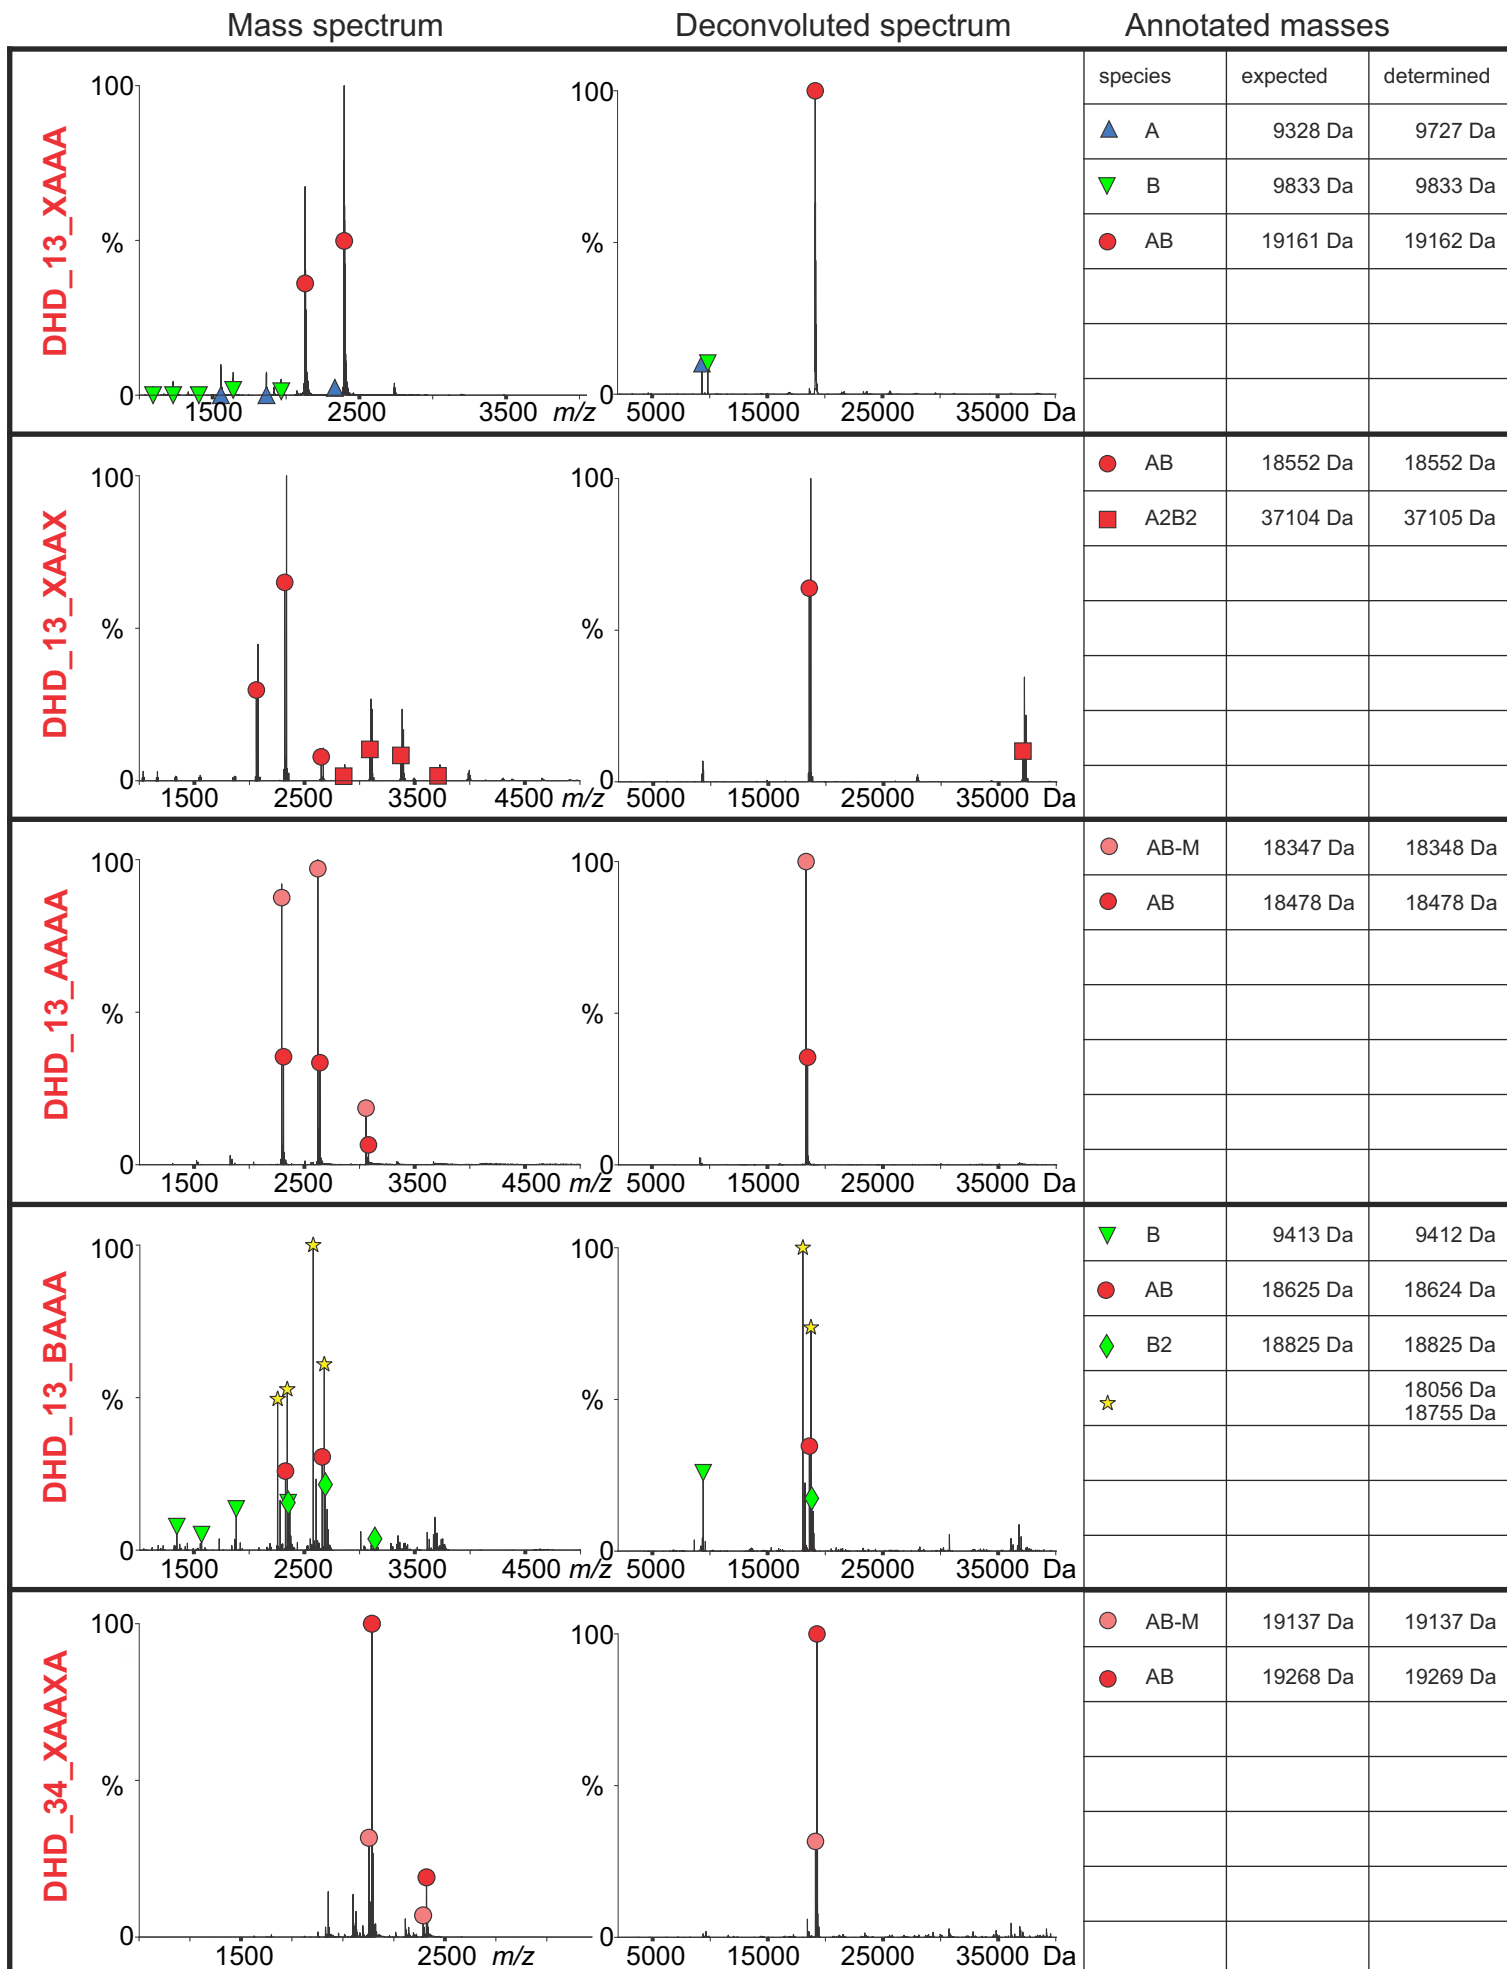

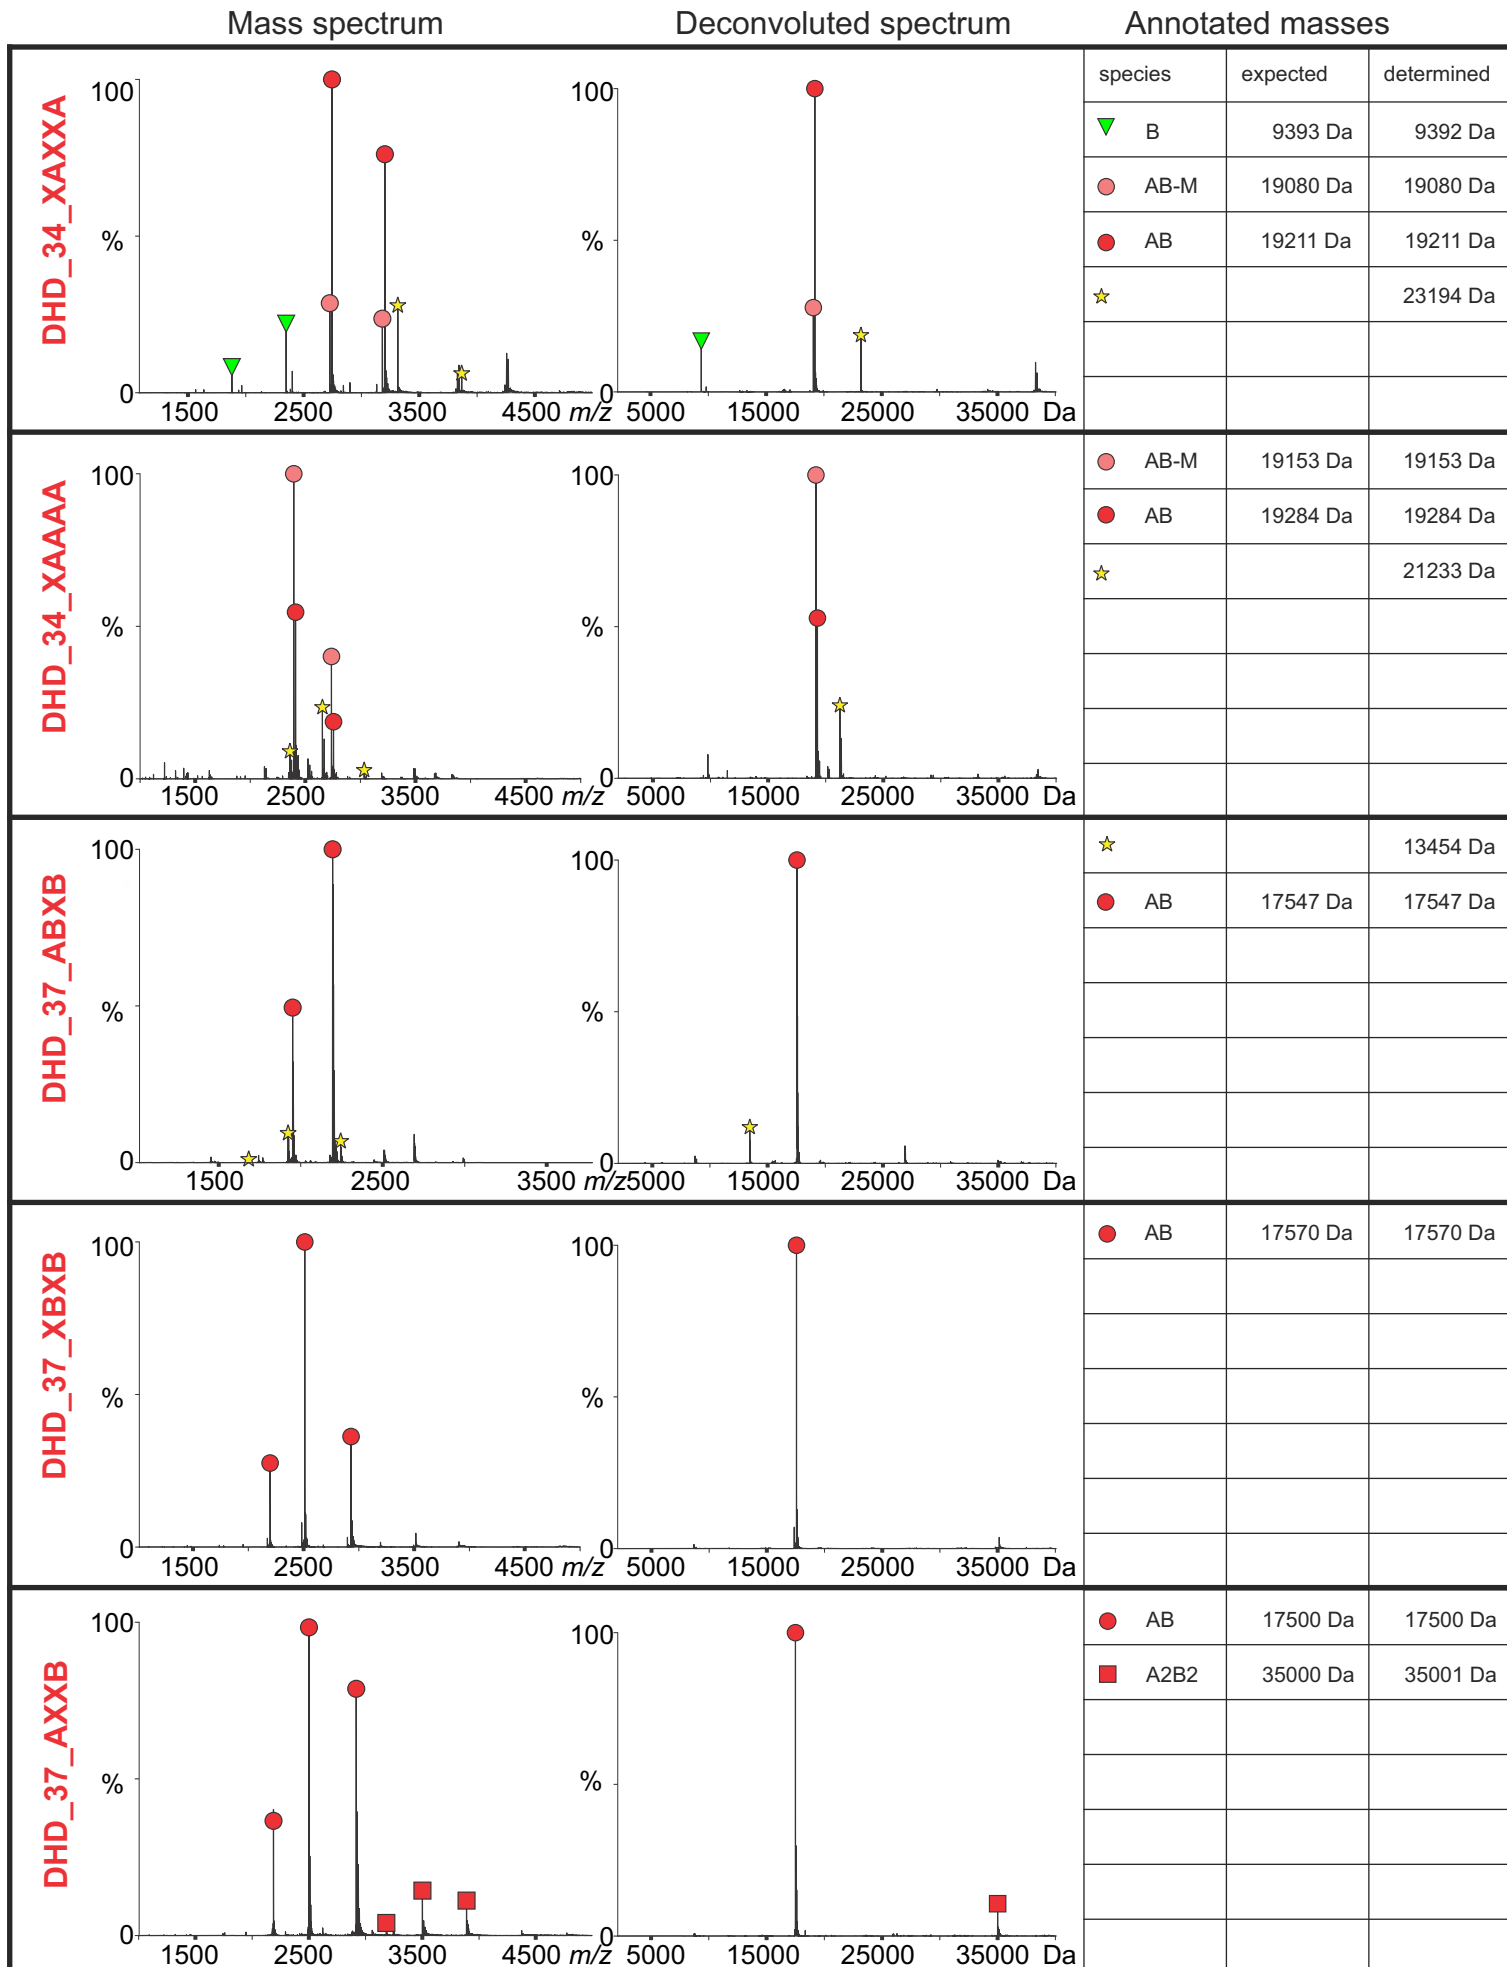

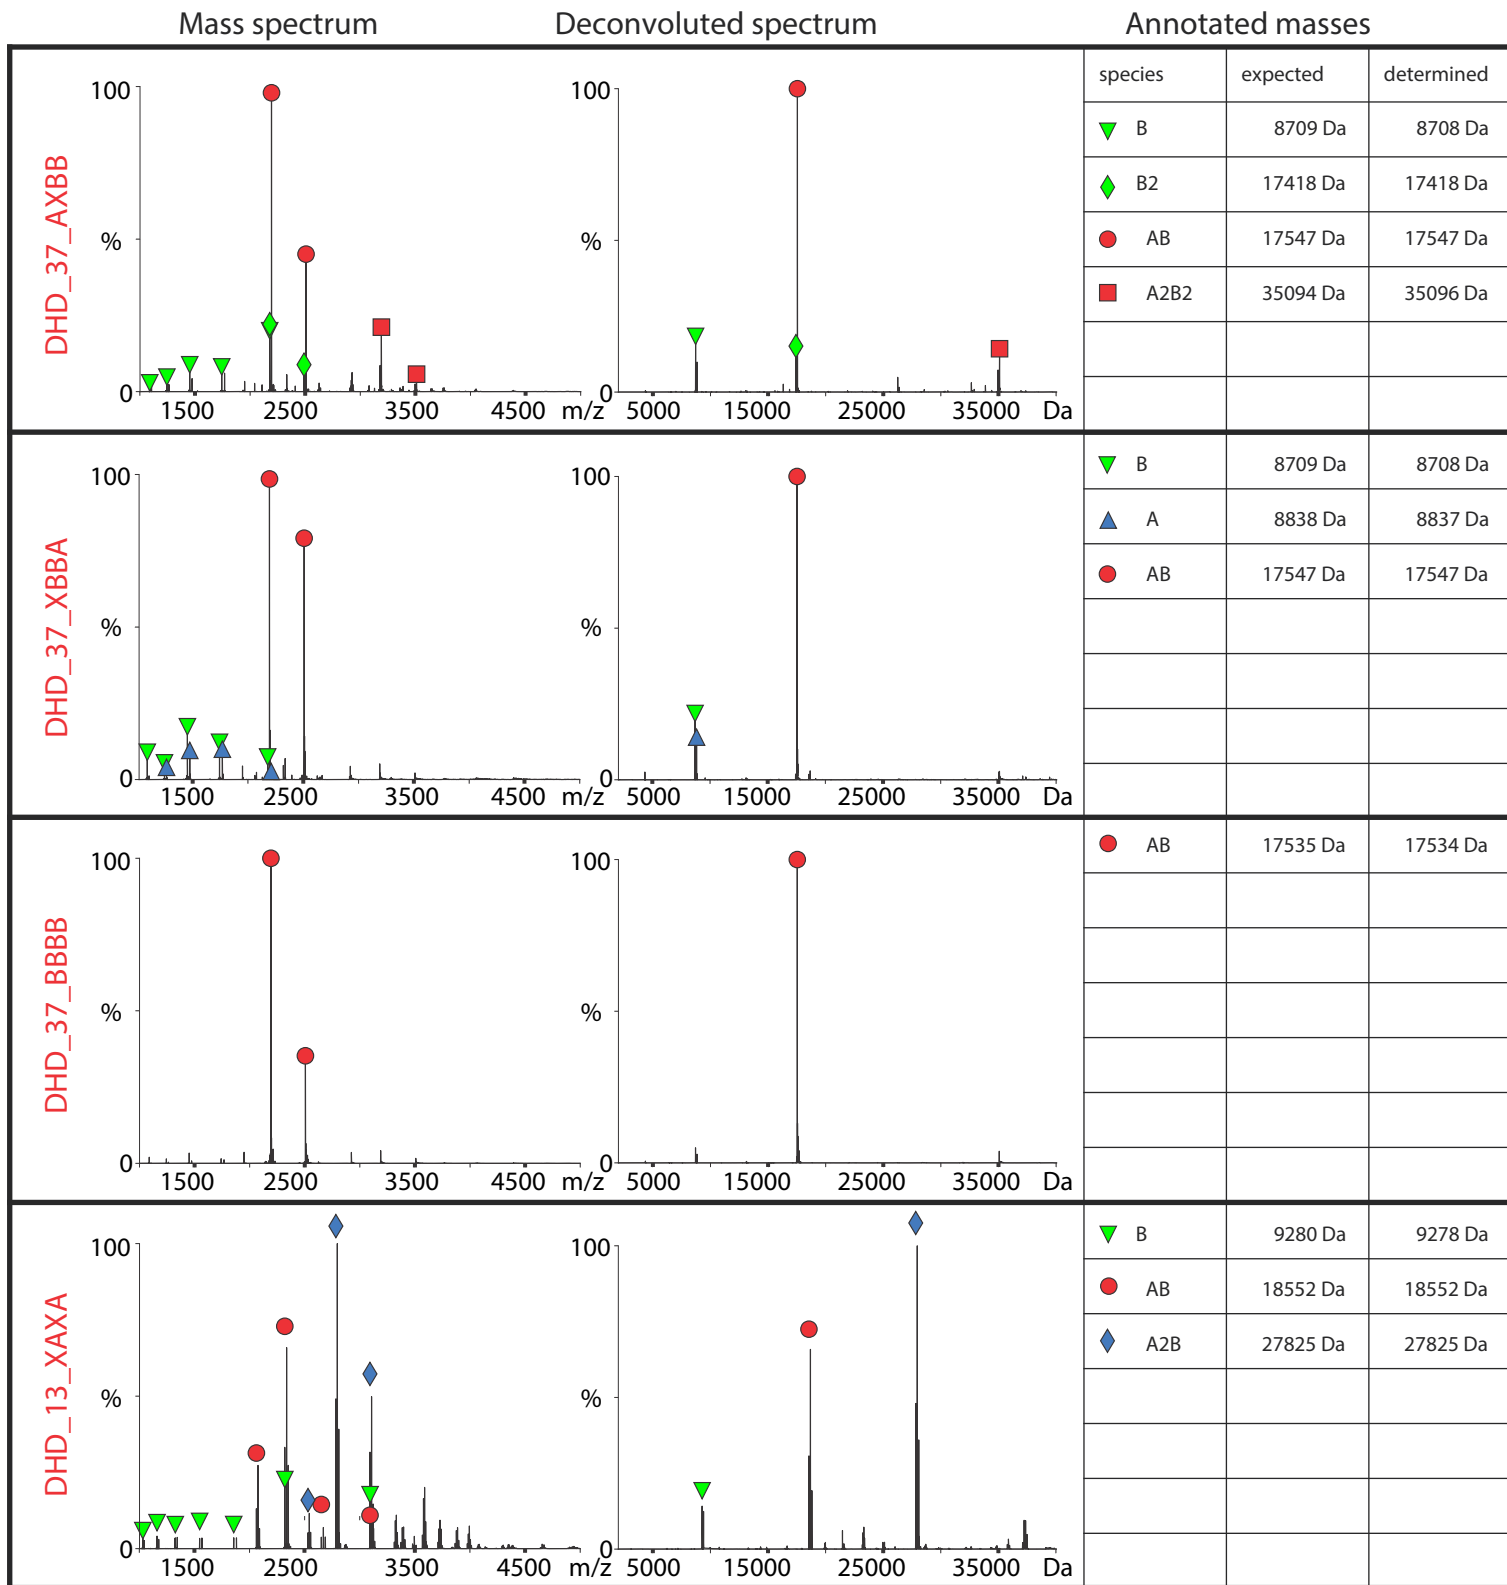

Supplement: NIHMS1025591-supplement-Sup_Table_8.pdf [file NIHMS1025591-supplement-Sup_Table_8.pdf]
